# Supplementary material for: Alternate splicing of transcripts shape macrophage response to Mycobacterium tuberculosis infection
Source: PLoS Pathog. 2017 Mar 3;13(3):e1006236. doi: 10.1371/journal.ppat.1006236 (PMC5352146; doi:10.1371/journal.ppat.1006236)
Supplement: S3 Table — (XLSX) [file ppat.1006236.s010.xlsx]

## Sheet: H37Ra 0 Hour
GO Term	Description	P-value	FDR q-value	Enrichment	N	B	n	b	Genes
GO:0044700	single organism signaling	4.39e-08	0.00062	1.85	14437	469	1334	80	[SYN1 - synapsin i, LHB - luteinizing hormone beta polypeptide, CRB1 - crumbs homolog 1 (drosophila), LHX1 - lim homeobox 1, SLC6A9 - solute carrier family 6 (neurotransmitter transporter, glycine), member 9, GALR2 - galanin receptor 2, CHRNA7 - cholinergic receptor, nicotinic, alpha 7 (neuronal), DRD4 - dopamine receptor d4, PCDH15 - protocadherin-related 15, CHRNB2 - cholinergic receptor, nicot…
GO:0023052	signaling	5.82e-08	0.000411	1.83	14437	472	1334	80	[SYN1 - synapsin i, LHB - luteinizing hormone beta polypeptide, CRB1 - crumbs homolog 1 (drosophila), LHX1 - lim homeobox 1, SLC6A9 - solute carrier family 6 (neurotransmitter transporter, glycine), member 9, GALR2 - galanin receptor 2, CHRNA7 - cholinergic receptor, nicotinic, alpha 7 (neuronal), DRD4 - dopamine receptor d4, PCDH15 - protocadherin-related 15, CHRNB2 - cholinergic receptor, nicot…
GO:0007186	G-protein coupled receptor signaling pathway	5.84e-08	0.000275	1.8	14437	504	1334	84	[RGS19 - regulator of g-protein signaling 19, AKR1C3 - aldo-keto reductase family 1, member c3, LHB - luteinizing hormone beta polypeptide, GNGT1 - guanine nucleotide binding protein (g protein), gamma transducing activity polypeptide 1, GALR2 - galanin receptor 2, OR1F1 - olfactory receptor, family 1, subfamily f, member 1, GPR146 - g protein-coupled receptor 146, DRD4 - dopamine receptor d4, OR…
GO:0048731	system development	2.83e-07	0.001	1.75	14437	514	1334	83	[LHX1 - lim homeobox 1, PCDH15 - protocadherin-related 15, GFRA2 - gdnf family receptor alpha 2, CHRNA3 - cholinergic receptor, nicotinic, alpha 3 (neuronal), SPOCK1 - sparc/osteonectin, cwcv and kazal-like domains proteoglycan (testican) 1, DRP2 - dystrophin related protein 2, PCDHGA8 - protocadherin gamma subfamily a, 8, WFIKKN1 - wap, follistatin/kazal, immunoglobulin, kunitz and netrin domain…
GO:0007267	cell-cell signaling	4.36e-07	0.00123	1.82	14437	422	1334	71	[SYN1 - synapsin i, LHB - luteinizing hormone beta polypeptide, CRB1 - crumbs homolog 1 (drosophila), SLC6A9 - solute carrier family 6 (neurotransmitter transporter, glycine), member 9, LHX1 - lim homeobox 1, GALR2 - galanin receptor 2, CHRNA7 - cholinergic receptor, nicotinic, alpha 7 (neuronal), DRD4 - dopamine receptor d4, PCDH15 - protocadherin-related 15, CHRNB2 - cholinergic receptor, nicot…
GO:0003008	system process	2.08e-06	0.00491	1.51	14437	859	1334	120	[GALR2 - galanin receptor 2, NPAS4 - neuronal pas domain protein 4, CCDC78 - coiled-coil domain containing 78, HSD11B2 - hydroxysteroid (11-beta) dehydrogenase 2, GNG13 - guanine nucleotide binding protein (g protein), gamma 13, SPTBN4 - spectrin, beta, non-erythrocytic 4, CNTNAP1 - contactin associated protein 1, CXCL12 - chemokine (c-x-c motif) ligand 12, IMPG2 - interphotoreceptor matrix prote…
GO:0007399	nervous system development	3.17e-06	0.0064	2.07	14437	225	1334	43	[CPNE6 - copine vi (neuronal), LHX1 - lim homeobox 1, GFRA2 - gdnf family receptor alpha 2, PCDH15 - protocadherin-related 15, FGF13 - fibroblast growth factor 13, MPPED2 - metallophosphoesterase domain containing 2, DLG2 - discs, large homolog 2 (drosophila), CHRNA3 - cholinergic receptor, nicotinic, alpha 3 (neuronal), AVIL - advillin, SERF1A - small edrk-rich factor 1a (telomeric), SPOCK1 - sp…
GO:0032501	multicellular organismal process	6.35e-06	0.0112	1.27	14437	2308	1334	271	[RGS19 - regulator of g-protein signaling 19, LHX1 - lim homeobox 1, NPAS4 - neuronal pas domain protein 4, GALR2 - galanin receptor 2, ACSBG2 - acyl-coa synthetase bubblegum family member 2, HSD11B2 - hydroxysteroid (11-beta) dehydrogenase 2, SPTBN4 - spectrin, beta, non-erythrocytic 4, CATSPER2 - cation channel, sperm associated 2, PLXNB1 - plexin b1, ESRP2 - epithelial splicing regulatory prot…
GO:0050906	detection of stimulus involved in sensory perception	1.27e-05	0.0199	2.94	14437	70	1334	19	[RTP1 - receptor (chemosensory) transporter protein 1, OR1F1 - olfactory receptor, family 1, subfamily f, member 1, KIAA1045 - kiaa1045, STRC - stereocilin, OR2C1 - olfactory receptor, family 2, subfamily c, member 1, GNAT2 - guanine nucleotide binding protein (g protein), alpha transducing activity polypeptide 2, EPHB1 - eph receptor b1, LPO - lactoperoxidase, OR2B11 - olfactory receptor, family…
GO:0098916	anterograde trans-synaptic signaling	1.51e-05	0.0213	2	14437	216	1334	40	[CPNE6 - copine vi (neuronal), SYN1 - synapsin i, GALR2 - galanin receptor 2, SLC6A9 - solute carrier family 6 (neurotransmitter transporter, glycine), member 9, CHRNA7 - cholinergic receptor, nicotinic, alpha 7 (neuronal), DRD4 - dopamine receptor d4, CHRNB2 - cholinergic receptor, nicotinic, beta 2 (neuronal), DLG2 - discs, large homolog 2 (drosophila), SLC6A4 - solute carrier family 6 (neurotr…
GO:0007268	chemical synaptic transmission	1.51e-05	0.0194	2	14437	216	1334	40	[CPNE6 - copine vi (neuronal), SYN1 - synapsin i, GALR2 - galanin receptor 2, SLC6A9 - solute carrier family 6 (neurotransmitter transporter, glycine), member 9, CHRNA7 - cholinergic receptor, nicotinic, alpha 7 (neuronal), DRD4 - dopamine receptor d4, CHRNB2 - cholinergic receptor, nicotinic, beta 2 (neuronal), DLG2 - discs, large homolog 2 (drosophila), SLC6A4 - solute carrier family 6 (neurotr…
GO:0099536	synaptic signaling	1.69e-05	0.0199	1.99	14437	217	1334	40	[CPNE6 - copine vi (neuronal), SYN1 - synapsin i, GALR2 - galanin receptor 2, SLC6A9 - solute carrier family 6 (neurotransmitter transporter, glycine), member 9, CHRNA7 - cholinergic receptor, nicotinic, alpha 7 (neuronal), DRD4 - dopamine receptor d4, CHRNB2 - cholinergic receptor, nicotinic, beta 2 (neuronal), DLG2 - discs, large homolog 2 (drosophila), SLC6A4 - solute carrier family 6 (neurotr…
GO:0099537	trans-synaptic signaling	1.69e-05	0.0184	1.99	14437	217	1334	40	[CPNE6 - copine vi (neuronal), SYN1 - synapsin i, GALR2 - galanin receptor 2, SLC6A9 - solute carrier family 6 (neurotransmitter transporter, glycine), member 9, CHRNA7 - cholinergic receptor, nicotinic, alpha 7 (neuronal), DRD4 - dopamine receptor d4, CHRNB2 - cholinergic receptor, nicotinic, beta 2 (neuronal), DLG2 - discs, large homolog 2 (drosophila), SLC6A4 - solute carrier family 6 (neurotr…
GO:0071805	potassium ion transmembrane transport	2.23e-05	0.0225	2.54	14437	98	1334	23	[KCNG3 - potassium voltage-gated channel, subfamily g, member 3, KCNH8 - potassium voltage-gated channel, subfamily h (eag-related), member 8, CNGA1 - cyclic nucleotide gated channel alpha 1, KCNV2 - potassium channel, subfamily v, member 2, KCNK2 - potassium channel, subfamily k, member 2, P2RY12 - purinergic receptor p2y, g-protein coupled, 12, KCNJ5 - potassium inwardly-rectifying channel, sub…
GO:0071804	cellular potassium ion transport	2.23e-05	0.021	2.54	14437	98	1334	23	[KCNG3 - potassium voltage-gated channel, subfamily g, member 3, KCNH8 - potassium voltage-gated channel, subfamily h (eag-related), member 8, CNGA1 - cyclic nucleotide gated channel alpha 1, KCNV2 - potassium channel, subfamily v, member 2, KCNK2 - potassium channel, subfamily k, member 2, P2RY12 - purinergic receptor p2y, g-protein coupled, 12, KCNJ5 - potassium inwardly-rectifying channel, sub…
GO:0048856	anatomical structure development	2.55e-05	0.0225	1.24	14437	2439	1334	280	[LHB - luteinizing hormone beta polypeptide, LHX1 - lim homeobox 1, GALR2 - galanin receptor 2, GFRA2 - gdnf family receptor alpha 2, ACSBG2 - acyl-coa synthetase bubblegum family member 2, TTC26 - tetratricopeptide repeat domain 26, SPOCK1 - sparc/osteonectin, cwcv and kazal-like domains proteoglycan (testican) 1, CATSPER2 - cation channel, sperm associated 2, EML1 - echinoderm microtubule assoc…
GO:0032502	developmental process	2.6e-05	0.0216	1.19	14437	3620	1334	397	[LHB - luteinizing hormone beta polypeptide, LHX1 - lim homeobox 1, NPAS4 - neuronal pas domain protein 4, GFRA2 - gdnf family receptor alpha 2, PHLDA3 - pleckstrin homology-like domain, family a, member 3, TTC26 - tetratricopeptide repeat domain 26, TNFRSF12A - tumor necrosis factor receptor superfamily, member 12a, SPTBN4 - spectrin, beta, non-erythrocytic 4, CATSPER2 - cation channel, sperm as…
GO:0050877	neurological system process	2.68e-05	0.0211	1.6	14437	507	1334	75	[NPAS4 - neuronal pas domain protein 4, GALR2 - galanin receptor 2, CHRNA7 - cholinergic receptor, nicotinic, alpha 7 (neuronal), PCDH15 - protocadherin-related 15, CHRNB2 - cholinergic receptor, nicotinic, beta 2 (neuronal), SLC6A4 - solute carrier family 6 (neurotransmitter transporter), member 4, GNG13 - guanine nucleotide binding protein (g protein), gamma 13, MYO3B - myosin iiib, SPTBN4 - sp…
GO:0050907	detection of chemical stimulus involved in sensory perception	2.77e-05	0.0206	3.61	14437	39	1334	13	[RTP1 - receptor (chemosensory) transporter protein 1, OR1F1 - olfactory receptor, family 1, subfamily f, member 1, OR2C1 - olfactory receptor, family 2, subfamily c, member 1, GNAT2 - guanine nucleotide binding protein (g protein), alpha transducing activity polypeptide 2, LPO - lactoperoxidase, OR2B11 - olfactory receptor, family 2, subfamily b, member 11, OR2B6 - olfactory receptor, family 2, …
GO:0007154	cell communication	8.45e-05	0.0597	1.51	14437	586	1334	82	[SYN1 - synapsin i, LHB - luteinizing hormone beta polypeptide, KREMEN2 - kringle containing transmembrane protein 2, AKR1C3 - aldo-keto reductase family 1, member c3, CRB1 - crumbs homolog 1 (drosophila), LHX1 - lim homeobox 1, SLC6A9 - solute carrier family 6 (neurotransmitter transporter, glycine), member 9, GALR2 - galanin receptor 2, CHRNA7 - cholinergic receptor, nicotinic, alpha 7 (neurona…
GO:0042487	regulation of odontogenesis of dentin-containing tooth	9.32e-05	0.0627	6.49	14437	10	1334	6	[CSF1 - colony stimulating factor 1 (macrophage), DMRT3 - doublesex and mab-3 related transcription factor 3, RSPO2 - r-spondin 2, BMP4 - bone morphogenetic protein 4, FGF8 - fibroblast growth factor 8 (androgen-induced), TNFRSF11B - tumor necrosis factor receptor superfamily, member 11b]
GO:0006813	potassium ion transport	0.00013	0.0834	2.28	14437	109	1334	23	[KCNG3 - potassium voltage-gated channel, subfamily g, member 3, KCNH8 - potassium voltage-gated channel, subfamily h (eag-related), member 8, CNGA1 - cyclic nucleotide gated channel alpha 1, KCNV2 - potassium channel, subfamily v, member 2, KCNK2 - potassium channel, subfamily k, member 2, P2RY12 - purinergic receptor p2y, g-protein coupled, 12, KCNJ5 - potassium inwardly-rectifying channel, sub…
GO:0060078	regulation of postsynaptic membrane potential	0.00017	0.105	3.73	14437	29	1334	10	[GRIK5 - glutamate receptor, ionotropic, kainate 5, DGKI - diacylglycerol kinase, iota, NPAS4 - neuronal pas domain protein 4, DRD4 - dopamine receptor d4, ADORA1 - adenosine a1 receptor, HCN4 - hyperpolarization activated cyclic nucleotide-gated potassium channel 4, CHRNA3 - cholinergic receptor, nicotinic, alpha 3 (neuronal), NPFF - neuropeptide ff-amide peptide precursor, SCN4B - sodium channe…
GO:0051093	negative regulation of developmental process	0.000179	0.105	1.47	14437	635	1334	86	[TRPV4 - transient receptor potential cation channel, subfamily v, member 4, HLA-G - major histocompatibility complex, class i, g, GPR55 - g protein-coupled receptor 55, SLC6A4 - solute carrier family 6 (neurotransmitter transporter), member 4, FUZ - fuzzy planar cell polarity protein, SPOCK1 - sparc/osteonectin, cwcv and kazal-like domains proteoglycan (testican) 1, USH2A - usher syndrome 2a (au…
GO:0007600	sensory perception	0.000231	0.131	1.71	14437	284	1334	45	[CNGA1 - cyclic nucleotide gated channel alpha 1, PROK2 - prokineticin 2, PCDH15 - protocadherin-related 15, CHRNB2 - cholinergic receptor, nicotinic, beta 2 (neuronal), PDE6G - phosphodiesterase 6g, cgmp-specific, rod, gamma, DLG2 - discs, large homolog 2 (drosophila), GNG13 - guanine nucleotide binding protein (g protein), gamma 13, ESPN - espin, OR2B11 - olfactory receptor, family 2, subfamily…
GO:0007156	homophilic cell adhesion via plasma membrane adhesion molecules	0.000267	0.145	2.23	14437	107	1334	22	[ROBO2 - roundabout, axon guidance receptor, homolog 2 (drosophila), PCDH15 - protocadherin-related 15, PCDHGA4 - protocadherin gamma subfamily a, 4, PCDHGA1 - protocadherin gamma subfamily a, 1, DSC3 - desmocollin 3, CDHR3 - cadherin-related family member 3, IGSF9B - immunoglobulin superfamily, member 9b, CDH22 - cadherin 22, type 2, PCDHGA8 - protocadherin gamma subfamily a, 8, CD226 - cd226 mo…
GO:0016056	rhodopsin mediated signaling pathway	0.000295	0.154	6.76	14437	8	1334	5	[GNGT1 - guanine nucleotide binding protein (g protein), gamma transducing activity polypeptide 1, CNGA1 - cyclic nucleotide gated channel alpha 1, PDE6G - phosphodiesterase 6g, cgmp-specific, rod, gamma, PDE6A - phosphodiesterase 6a, cgmp-specific, rod, alpha, PDE6B - phosphodiesterase 6b, cgmp-specific, rod, beta]
GO:0050912	detection of chemical stimulus involved in sensory perception of taste	0.000479	0.242	4.46	14437	17	1334	7	[RTP1 - receptor (chemosensory) transporter protein 1, PKD2L1 - polycystic kidney disease 2-like 1, CXXC11 - cxxc finger protein 11, GNAT2 - guanine nucleotide binding protein (g protein), alpha transducing activity polypeptide 2, LPO - lactoperoxidase, PIGR - polymeric immunoglobulin receptor, TAS2R31 - taste receptor, type 2, member 31]
GO:0098742	cell-cell adhesion via plasma-membrane adhesion molecules	0.000535	0.26	1.98	14437	142	1334	26	[PCDH15 - protocadherin-related 15, DSC3 - desmocollin 3, CDHR3 - cadherin-related family member 3, IGSF9B - immunoglobulin superfamily, member 9b, PCDHGA8 - protocadherin gamma subfamily a, 8, PCDHGB2 - protocadherin gamma subfamily b, 2, CD226 - cd226 molecule, CD6 - cd6 molecule, PCDHGC4 - protocadherin gamma subfamily c, 4, SDK2 - sidekick cell adhesion molecule 2, TENM4 - teneurin transmembr…
GO:0032331	negative regulation of chondrocyte differentiation	0.000597	0.281	4.99	14437	13	1334	6	[CHADL - chondroadherin-like, RARB - retinoic acid receptor, beta, NKX3-2 - nk3 homeobox 2, PTHLH - parathyroid hormone-like hormone, BMP4 - bone morphogenetic protein 4, SNAI2 - snail family zinc finger 2]
GO:0019748	secondary metabolic process	0.000652	0.297	3.48	14437	28	1334	9	[AKR1C3 - aldo-keto reductase family 1, member c3, AS3MT - arsenic (+3 oxidation state) methyltransferase, DCT - dopachrome tautomerase, CITED1 - cbp/p300-interacting transactivator, with glu/asp-rich carboxy-terminal domain, 1, CYP2D6 - cytochrome p450, family 2, subfamily d, polypeptide 6, AKR1B10 - aldo-keto reductase family 1, member b10 (aldose reductase), CYP1A1 - cytochrome p450, family 1,…
GO:0009593	detection of chemical stimulus	0.000696	0.307	2.5	14437	65	1334	15	[RTP1 - receptor (chemosensory) transporter protein 1, OR1F1 - olfactory receptor, family 1, subfamily f, member 1, TGFB3 - transforming growth factor, beta 3, OR2C1 - olfactory receptor, family 2, subfamily c, member 1, GNAT2 - guanine nucleotide binding protein (g protein), alpha transducing activity polypeptide 2, LPO - lactoperoxidase, OR2B11 - olfactory receptor, family 2, subfamily b, membe…
GO:0061037	negative regulation of cartilage development	0.000722	0.309	4.21	14437	18	1334	7	[CHADL - chondroadherin-like, RARB - retinoic acid receptor, beta, NKX3-2 - nk3 homeobox 2, WNT11 - wingless-type mmtv integration site family, member 11, PTHLH - parathyroid hormone-like hormone, BMP4 - bone morphogenetic protein 4, SNAI2 - snail family zinc finger 2]
GO:0045596	negative regulation of cell differentiation	0.000865	0.359	1.47	14437	485	1334	66	[TRPV4 - transient receptor potential cation channel, subfamily v, member 4, HLA-G - major histocompatibility complex, class i, g, SLC6A4 - solute carrier family 6 (neurotransmitter transporter), member 4, GPR55 - g protein-coupled receptor 55, FUZ - fuzzy planar cell polarity protein, SPOCK1 - sparc/osteonectin, cwcv and kazal-like domains proteoglycan (testican) 1, USH2A - usher syndrome 2a (au…
GO:0001508	action potential	0.000905	0.365	2.76	14437	47	1334	12	[KCND2 - potassium voltage-gated channel, shal-related subfamily, member 2, NEDD4L - neural precursor cell expressed, developmentally down-regulated 4-like, e3 ubiquitin protein ligase, CHRNB2 - cholinergic receptor, nicotinic, beta 2 (neuronal), GPER1 - g protein-coupled estrogen receptor 1, HCN4 - hyperpolarization activated cyclic nucleotide-gated potassium channel 4, KCNE1L - kcne1-like, GPR8…
GO:0098532	histone H3-K27 trimethylation	0.000935	0.367	7.21	14437	6	1334	4	[HIST1H1E - histone cluster 1, h1e, HIST1H1D - histone cluster 1, h1d, HIST1H1C - histone cluster 1, h1c, CHD5 - chromodomain helicase dna binding protein 5]
GO:0001708	cell fate specification	0.00094	0.359	2.9	14437	41	1334	11	[GSX2 - gs homeobox 2, PTCH2 - patched 2, TLX3 - t-cell leukemia homeobox 3, TENM4 - teneurin transmembrane protein 4, SMO - smoothened, frizzled family receptor, GSC - goosecoid homeobox, DMRT3 - doublesex and mab-3 related transcription factor 3, SOX6 - sry (sex determining region y)-box 6, HOXC10 - homeobox c10, MNX1 - motor neuron and pancreas homeobox 1, TBX1 - t-box 1]
GO:0001580	detection of chemical stimulus involved in sensory perception of bitter taste	0.000963	0.358	4.64	14437	14	1334	6	[RTP1 - receptor (chemosensory) transporter protein 1, CXXC11 - cxxc finger protein 11, GNAT2 - guanine nucleotide binding protein (g protein), alpha transducing activity polypeptide 2, LPO - lactoperoxidase, PIGR - polymeric immunoglobulin receptor, TAS2R31 - taste receptor, type 2, member 31]

## Sheet: H37Ra 6 Hours
GO Term	Description	P-value	FDR q-value	Enrichment	N	B	n	b	Genes
GO:0048856	anatomical structure development	5.35e-08	0.000756	1.23	14437	2439	2259	471	[GFAP - glial fibrillary acidic protein, MDGA1 - mam domain containing glycosylphosphatidylinositol anchor 1, LHB - luteinizing hormone beta polypeptide, SPTA1 - spectrin, alpha, erythrocytic 1 (elliptocytosis 2), COX6B1 - cytochrome c oxidase subunit vib polypeptide 1 (ubiquitous), LHX1 - lim homeobox 1, MSTN - myostatin, PITPNM1 - phosphatidylinositol transfer protein, membrane-associated 1, LI…
GO:0007186	G-protein coupled receptor signaling pathway	1.37e-07	0.000967	1.56	14437	504	2259	123	[RGS19 - regulator of g-protein signaling 19, LHB - luteinizing hormone beta polypeptide, GALR2 - galanin receptor 2, OR1F1 - olfactory receptor, family 1, subfamily f, member 1, GPR52 - g protein-coupled receptor 52, GPR55 - g protein-coupled receptor 55, AKR1C2 - aldo-keto reductase family 1, member c2, ABCA1 - atp-binding cassette, sub-family a (abc1), member 1, NXPH3 - neurexophilin 3, FLNA -…
GO:0032502	developmental process	1.01e-06	0.00474	1.16	14437	3620	2259	658	[GFAP - glial fibrillary acidic protein, MDGA1 - mam domain containing glycosylphosphatidylinositol anchor 1, LHB - luteinizing hormone beta polypeptide, SPTA1 - spectrin, alpha, erythrocytic 1 (elliptocytosis 2), GFI1 - growth factor independent 1 transcription repressor, COX6B1 - cytochrome c oxidase subunit vib polypeptide 1 (ubiquitous), LHX1 - lim homeobox 1, KIF20B - kinesin family member 2…
GO:0044700	single organism signaling	2.71e-06	0.00957	1.51	14437	469	2259	111	[LHB - luteinizing hormone beta polypeptide, PARK2 - parkinson protein 2, e3 ubiquitin protein ligase (parkin), LHX1 - lim homeobox 1, GALR2 - galanin receptor 2, GPR52 - g protein-coupled receptor 52, FCHSD2 - fch and double sh3 domains 2, SPTBN4 - spectrin, beta, non-erythrocytic 4, INHBA - inhibin, beta a, PTGDR2 - prostaglandin d2 receptor 2, ATXN3 - ataxin 3, MLLT4 - myeloid/lymphoid or mixe…
GO:0023052	signaling	3.72e-06	0.0105	1.5	14437	472	2259	111	[LHB - luteinizing hormone beta polypeptide, PARK2 - parkinson protein 2, e3 ubiquitin protein ligase (parkin), LHX1 - lim homeobox 1, GALR2 - galanin receptor 2, GPR52 - g protein-coupled receptor 52, FCHSD2 - fch and double sh3 domains 2, SPTBN4 - spectrin, beta, non-erythrocytic 4, INHBA - inhibin, beta a, ATXN3 - ataxin 3, PTGDR2 - prostaglandin d2 receptor 2, MLLT4 - myeloid/lymphoid or mixe…
GO:0032501	multicellular organismal process	6.02e-06	0.0142	1.2	14437	2308	2259	433	[LHX1 - lim homeobox 1, MSTN - myostatin, SPTBN4 - spectrin, beta, non-erythrocytic 4, LIF - leukemia inhibitory factor, ABCA1 - atp-binding cassette, sub-family a (abc1), member 1, CATSPER2 - cation channel, sperm associated 2, ESRP2 - epithelial splicing regulatory protein 2, LDLR - low density lipoprotein receptor, CYP39A1 - cytochrome p450, family 39, subfamily a, polypeptide 1, NME8 - nme/nm…
GO:0048869	cellular developmental process	7.31e-06	0.0147	1.22	14437	1940	2259	370	[GFAP - glial fibrillary acidic protein, RGS19 - regulator of g-protein signaling 19, BOK - bcl2-related ovarian killer, MDGA1 - mam domain containing glycosylphosphatidylinositol anchor 1, GFI1 - growth factor independent 1 transcription repressor, LHX1 - lim homeobox 1, KIF20B - kinesin family member 20b, MSTN - myostatin, SPTBN4 - spectrin, beta, non-erythrocytic 4, LIF - leukemia inhibitory f…
GO:0044767	single-organism developmental process	7.4e-06	0.0131	1.16	14437	3286	2259	595	[GFAP - glial fibrillary acidic protein, MDGA1 - mam domain containing glycosylphosphatidylinositol anchor 1, LHB - luteinizing hormone beta polypeptide, SPTA1 - spectrin, alpha, erythrocytic 1 (elliptocytosis 2), GFI1 - growth factor independent 1 transcription repressor, COX6B1 - cytochrome c oxidase subunit vib polypeptide 1 (ubiquitous), LHX1 - lim homeobox 1, KIF20B - kinesin family member 2…
GO:0030182	neuron differentiation	8.59e-06	0.0135	1.88	14437	156	2259	46	[MDGA1 - mam domain containing glycosylphosphatidylinositol anchor 1, PITX2 - paired-like homeodomain 2, LHX1 - lim homeobox 1, FZD5 - frizzled family receptor 5, ATP2B2 - atpase, ca++ transporting, plasma membrane 2, SHH - sonic hedgehog, ISL1 - isl lim homeobox 1, SPOCK1 - sparc/osteonectin, cwcv and kazal-like domains proteoglycan (testican) 1, FGF8 - fibroblast growth factor 8 (androgen-induc…
GO:0010107	potassium ion import	1.21e-05	0.0171	4.26	14437	15	2259	10	[KCNJ14 - potassium inwardly-rectifying channel, subfamily j, member 14, ABCC9 - atp-binding cassette, sub-family c (cftr/mrp), member 9, KCNJ15 - potassium inwardly-rectifying channel, subfamily j, member 15, KCNJ5 - potassium inwardly-rectifying channel, subfamily j, member 5, KCNJ2 - potassium inwardly-rectifying channel, subfamily j, member 2, ATP1A2 - atpase, na+/k+ transporting, alpha 2 pol…
GO:0003008	system process	1.87e-05	0.024	1.33	14437	859	2259	179	[LRIG2 - leucine-rich repeats and immunoglobulin-like domains 2, TPRN - taperin, PARK2 - parkinson protein 2, e3 ubiquitin protein ligase (parkin), AFF2 - af4/fmr2 family, member 2, NCAM2 - neural cell adhesion molecule 2, GPR155 - g protein-coupled receptor 155, GALR2 - galanin receptor 2, GPR52 - g protein-coupled receptor 52, PRR4 - proline rich 4 (lacrimal), F11R - f11 receptor, MSTN - myosta…
GO:0002227	innate immune response in mucosa	2.17e-05	0.0255	4.42	14437	13	2259	9	[HIST1H2BC - histone cluster 1, h2bc, DEFB1 - defensin, beta 1, HIST2H2BE - histone cluster 2, h2be, NOS2 - nitric oxide synthase 2, inducible, HIST1H2BJ - histone cluster 1, h2bj, HIST1H2BF - histone cluster 1, h2bf, CAMP - cathelicidin antimicrobial peptide, HIST1H2BG - histone cluster 1, h2bg, LTF - lactotransferrin]
GO:0007267	cell-cell signaling	2.34e-05	0.0255	1.48	14437	422	2259	98	[LHB - luteinizing hormone beta polypeptide, PARK2 - parkinson protein 2, e3 ubiquitin protein ligase (parkin), LHX1 - lim homeobox 1, GALR2 - galanin receptor 2, GPR52 - g protein-coupled receptor 52, FCHSD2 - fch and double sh3 domains 2, INHBA - inhibin, beta a, ATXN3 - ataxin 3, PTGDR2 - prostaglandin d2 receptor 2, MLLT4 - myeloid/lymphoid or mixed-lineage leukemia (trithorax homolog, drosop…
GO:0050877	neurological system process	2.42e-05	0.0244	1.44	14437	507	2259	114	[TPRN - taperin, PARK2 - parkinson protein 2, e3 ubiquitin protein ligase (parkin), LRIG2 - leucine-rich repeats and immunoglobulin-like domains 2, NCAM2 - neural cell adhesion molecule 2, AFF2 - af4/fmr2 family, member 2, GALR2 - galanin receptor 2, GPR155 - g protein-coupled receptor 155, GPR52 - g protein-coupled receptor 52, PRR4 - proline rich 4 (lacrimal), SPTBN4 - spectrin, beta, non-eryth…
GO:0070193	synaptonemal complex organization	2.99e-05	0.0281	3.7	14437	19	2259	11	[SYCE1L - synaptonemal complex central element protein 1-like, PLK1 - polo-like kinase 1, SYCE2 - synaptonemal complex central element protein 2, AGO4 - argonaute risc catalytic component 4, SYCP1 - synaptonemal complex protein 1, HSPA2 - heat shock 70kda protein 2, TEX15 - testis expressed 15, SYCE3 - synaptonemal complex central element protein 3, SYCP2 - synaptonemal complex protein 2, HORMAD1…
GO:0032570	response to progesterone	4.9e-05	0.0433	2.9	14437	33	2259	15	[TGFB2 - transforming growth factor, beta 2, TGFB3 - transforming growth factor, beta 3, CATSPERG - catsper channel auxiliary subunit gamma, CLDN4 - claudin 4, CATSPERB - catsper channel auxiliary subunit beta, GJB2 - gap junction protein, beta 2, 26kda, CATSPER2 - cation channel, sperm associated 2, PTGER2 - prostaglandin e receptor 2 (subtype ep2), 53kda, CATSPER3 - cation channel, sperm associ…
GO:0006334	nucleosome assembly	5.83e-05	0.0484	1.97	14437	107	2259	33	[HIST1H3D - histone cluster 1, h3d, HIST1H2BD - histone cluster 1, h2bd, HIST2H2BF - histone cluster 2, h2bf, H2AFX - h2a histone family, member x, HIST1H4I - histone cluster 1, h4i, HIST1H2BC - histone cluster 1, h2bc, HIST1H2BO - histone cluster 1, h2bo, STRA13 - stimulated by retinoic acid 13, HIST2H2BE - histone cluster 2, h2be, HIST1H1T - histone cluster 1, h1t, CENPM - centromere protein m,…
GO:0022414	reproductive process	6.02e-05	0.0472	1.29	14437	961	2259	194	[BOK - bcl2-related ovarian killer, LHB - luteinizing hormone beta polypeptide, LHX1 - lim homeobox 1, STRA13 - stimulated by retinoic acid 13, MSTN - myostatin, SPTBN4 - spectrin, beta, non-erythrocytic 4, LIF - leukemia inhibitory factor, CATSPER2 - cation channel, sperm associated 2, SEPT4 - septin 4, FOXL2 - forkhead box l2, TRPC3 - transient receptor potential cation channel, subfamily c, me…
GO:0008284	positive regulation of cell proliferation	6.22e-05	0.0463	1.36	14437	654	2259	139	[GFAP - glial fibrillary acidic protein, CDC6 - cell division cycle 6, SPTA1 - spectrin, alpha, erythrocytic 1 (elliptocytosis 2), CDC20 - cell division cycle 20, SASH3 - sam and sh3 domain containing 3, BIRC5 - baculoviral iap repeat containing 5, CDK1 - cyclin-dependent kinase 1, KIF20B - kinesin family member 20b, FLT3 - fms-related tyrosine kinase 3, FLT1 - fms-related tyrosine kinase 1, FLT4…
GO:0003006	developmental process involved in reproduction	7.47e-05	0.0528	1.44	14437	434	2259	98	[BOK - bcl2-related ovarian killer, LHB - luteinizing hormone beta polypeptide, LHX1 - lim homeobox 1, RBM15 - rna binding motif protein 15, LIF - leukemia inhibitory factor, CDC25B - cell division cycle 25b, FOXL2 - forkhead box l2, SEPT4 - septin 4, INHBA - inhibin, beta a, PBX1 - pre-b-cell leukemia homeobox 1, INHBB - inhibin, beta b, SIX4 - six homeobox 4, CCDC155 - coiled-coil domain contai…
GO:0007154	cell communication	8.03e-05	0.054	1.37	14437	586	2259	126	[LHB - luteinizing hormone beta polypeptide, PARK2 - parkinson protein 2, e3 ubiquitin protein ligase (parkin), LHX1 - lim homeobox 1, GALR2 - galanin receptor 2, GPR52 - g protein-coupled receptor 52, FCHSD2 - fch and double sh3 domains 2, INHBA - inhibin, beta a, INHBB - inhibin, beta b, ATXN3 - ataxin 3, PTGDR2 - prostaglandin d2 receptor 2, MLLT4 - myeloid/lymphoid or mixed-lineage leukemia (…
GO:2000241	regulation of reproductive process	9.5e-05	0.061	2	14437	96	2259	30	[PLB1 - phospholipase b1, ACVR1C - activin a receptor, type ic, CDC20 - cell division cycle 20, NOX5 - nadph oxidase, ef-hand calcium binding domain 5, GNRH1 - gonadotropin-releasing hormone 1 (luteinizing-releasing hormone), SEMA3A - sema domain, immunoglobulin domain (ig), short basic domain, secreted, (semaphorin) 3a, SHH - sonic hedgehog, LIF - leukemia inhibitory factor, NPM2 - nucleophosmin…
GO:0007600	sensory perception	0.000155	0.0953	1.53	14437	284	2259	68	[LRIG2 - leucine-rich repeats and immunoglobulin-like domains 2, TPRN - taperin, NCAM2 - neural cell adhesion molecule 2, TIMP3 - timp metallopeptidase inhibitor 3, ATP2B2 - atpase, ca++ transporting, plasma membrane 2, CHRNB2 - cholinergic receptor, nicotinic, beta 2 (neuronal), PRR4 - proline rich 4 (lacrimal), SPTBN4 - spectrin, beta, non-erythrocytic 4, OR10P1 - olfactory receptor, family 10,…
GO:0009653	anatomical structure morphogenesis	0.000165	0.0973	1.27	14437	995	2259	197	[LHX1 - lim homeobox 1, KIF20B - kinesin family member 20b, SPTBN4 - spectrin, beta, non-erythrocytic 4, LIF - leukemia inhibitory factor, FOXL2 - forkhead box l2, GCNT1 - glucosaminyl (n-acetyl) transferase 1, core 2, RELA - v-rel avian reticuloendotheliosis viral oncogene homolog a, ESRP2 - epithelial splicing regulatory protein 2, TRPS1 - trichorhinophalangeal syndrome i, FARP1 - ferm, rhogef …
GO:0051606	detection of stimulus	0.000169	0.0953	1.68	14437	179	2259	47	[RFC4 - replication factor c (activator 1) 4, 37kda, CNGA1 - cyclic nucleotide gated channel alpha 1, TAS2R20 - taste receptor, type 2, member 20, OR1F1 - olfactory receptor, family 1, subfamily f, member 1, RFC2 - replication factor c (activator 1) 2, 40kda, PPEF1 - protein phosphatase, ef-hand calcium binding domain 1, PGLYRP2 - peptidoglycan recognition protein 2, ATP2B2 - atpase, ca++ transpo…
GO:0007130	synaptonemal complex assembly	0.000221	0.12	3.59	14437	16	2259	9	[SYCE1L - synaptonemal complex central element protein 1-like, SYCE2 - synaptonemal complex central element protein 2, AGO4 - argonaute risc catalytic component 4, SYCP1 - synaptonemal complex protein 1, TEX15 - testis expressed 15, SYCE3 - synaptonemal complex central element protein 3, HORMAD1 - horma domain containing 1, SYCP2 - synaptonemal complex protein 2, TEX12 - testis expressed 12]
GO:0033993	response to lipid	0.000224	0.117	1.35	14437	572	2259	121	[GFI1 - growth factor independent 1 transcription repressor, APOA2 - apolipoprotein a-ii, MSTN - myostatin, FLT3 - fms-related tyrosine kinase 3, AANAT - aralkylamine n-acetyltransferase, PAQR9 - progestin and adipoq receptor family member ix, AKR1C2 - aldo-keto reductase family 1, member c2, ABCA1 - atp-binding cassette, sub-family a (abc1), member 1, CATSPER2 - cation channel, sperm associated …
GO:0006275	regulation of DNA replication	0.000234	0.118	1.89	14437	105	2259	31	[CDC6 - cell division cycle 6, RFC4 - replication factor c (activator 1) 4, 37kda, RFC2 - replication factor c (activator 1) 2, 40kda, CDK1 - cyclin-dependent kinase 1, EREG - epiregulin, CDT1 - chromatin licensing and dna replication factor 1, ZRANB3 - zinc finger, ran-binding domain containing 3, PDGFRA - platelet-derived growth factor receptor, alpha polypeptide, PDGFB - platelet-derived growt…
GO:0050906	detection of stimulus involved in sensory perception	0.000266	0.129	2.1	14437	70	2259	23	[OR1F1 - olfactory receptor, family 1, subfamily f, member 1, PPEF1 - protein phosphatase, ef-hand calcium binding domain 1, TAS2R20 - taste receptor, type 2, member 20, ATP2B2 - atpase, ca++ transporting, plasma membrane 2, STRC - stereocilin, TMC1 - transmembrane channel-like 1, GNAT2 - guanine nucleotide binding protein (g protein), alpha transducing activity polypeptide 2, LPO - lactoperoxida…
GO:0044702	single organism reproductive process	0.000274	0.129	1.29	14437	776	2259	157	[BOK - bcl2-related ovarian killer, LHB - luteinizing hormone beta polypeptide, DDX6 - dead (asp-glu-ala-asp) box helicase 6, LHX1 - lim homeobox 1, MSTN - myostatin, SGOL1 - shugoshin-like 1 (s. pombe), RBM15 - rna binding motif protein 15, SPTBN4 - spectrin, beta, non-erythrocytic 4, CDC25C - cell division cycle 25c, LIF - leukemia inhibitory factor, CNBD2 - cyclic nucleotide binding domain con…
GO:0051480	regulation of cytosolic calcium ion concentration	0.000331	0.151	1.65	14437	174	2259	45	[BOK - bcl2-related ovarian killer, CCR5 - chemokine (c-c motif) receptor 5 (gene/pseudogene), C5AR2 - complement component 5a receptor 2, GALR2 - galanin receptor 2, ATP2B2 - atpase, ca++ transporting, plasma membrane 2, HRH4 - histamine receptor h4, GPR55 - g protein-coupled receptor 55, ATP1A2 - atpase, na+/k+ transporting, alpha 2 polypeptide, SLC35G1 - solute carrier family 35, member g1, PD…
GO:0034728	nucleosome organization	0.000367	0.162	1.76	14437	131	2259	36	[HIST1H3D - histone cluster 1, h3d, HIST1H2BD - histone cluster 1, h2bd, HIST2H2BF - histone cluster 2, h2bf, H2AFX - h2a histone family, member x, HIST1H4I - histone cluster 1, h4i, HIST1H2BC - histone cluster 1, h2bc, HIST1H2BO - histone cluster 1, h2bo, STRA13 - stimulated by retinoic acid 13, HIST2H2BE - histone cluster 2, h2be, HIST1H1T - histone cluster 1, h1t, CENPM - centromere protein m,…
GO:0009887	animal organ morphogenesis	0.000386	0.165	1.44	14437	356	2259	80	[LHX1 - lim homeobox 1, PLEKHA1 - pleckstrin homology domain containing, family a (phosphoinositide binding specific) member 1, LIF - leukemia inhibitory factor, FUZ - fuzzy planar cell polarity protein, TLE1 - transducin-like enhancer of split 1 (e(sp1) homolog, drosophila), PAX9 - paired box 9, FOXL2 - forkhead box l2, TLE3 - transducin-like enhancer of split 3 (e(sp1) homolog, drosophila), VAN…
GO:0008283	cell proliferation	0.000392	0.163	1.34	14437	552	2259	116	[EMP1 - epithelial membrane protein 1, BOK - bcl2-related ovarian killer, CDC25A - cell division cycle 25a, CDK1 - cyclin-dependent kinase 1, FLT3 - fms-related tyrosine kinase 3, CDC25C - cell division cycle 25c, EML1 - echinoderm microtubule associated protein like 1, CARD11 - caspase recruitment domain family, member 11, OSM - oncostatin m, ACE - angiotensin i converting enzyme, HRAS - harvey …
GO:0009725	response to hormone	0.0004	0.161	1.38	14437	448	2259	97	[CDC6 - cell division cycle 6, APOA2 - apolipoprotein a-ii, MSTN - myostatin, FLT3 - fms-related tyrosine kinase 3, AANAT - aralkylamine n-acetyltransferase, PAQR9 - progestin and adipoq receptor family member ix, AKR1C2 - aldo-keto reductase family 1, member c2, AKR1C1 - aldo-keto reductase family 1, member c1, CATSPER2 - cation channel, sperm associated 2, GCNT1 - glucosaminyl (n-acetyl) transf…
GO:0002385	mucosal immune response	0.000405	0.159	3.38	14437	17	2259	9	[HIST1H2BC - histone cluster 1, h2bc, DEFB1 - defensin, beta 1, HIST2H2BE - histone cluster 2, h2be, NOS2 - nitric oxide synthase 2, inducible, HIST1H2BJ - histone cluster 1, h2bj, HIST1H2BF - histone cluster 1, h2bf, CAMP - cathelicidin antimicrobial peptide, HIST1H2BG - histone cluster 1, h2bg, LTF - lactotransferrin]
GO:0050982	detection of mechanical stimulus	0.000416	0.159	2.68	14437	31	2259	13	[ATP2B2 - atpase, ca++ transporting, plasma membrane 2, TMC1 - transmembrane channel-like 1, STRC - stereocilin, ANO3 - anoctamin 3, PKD2L2 - polycystic kidney disease 2-like 2, JUP - junction plakoglobin, PKD2L1 - polycystic kidney disease 2-like 1, PKDREJ - polycystin (pkd) family receptor for egg jelly, LOXHD1 - lipoxygenase homology domains 1, PIEZO2 - piezo-type mechanosensitive ion channel …
GO:0009888	tissue development	0.000419	0.156	1.4	14437	416	2259	91	[EMP1 - epithelial membrane protein 1, LHX1 - lim homeobox 1, ATP2B2 - atpase, ca++ transporting, plasma membrane 2, MSTN - myostatin, ZNF358 - zinc finger protein 358, TMEM119 - transmembrane protein 119, SRPK3 - srsf protein kinase 3, LIF - leukemia inhibitory factor, PAX9 - paired box 9, FOXL2 - forkhead box l2, MTPN - myotrophin, SIX4 - six homeobox 4, JAG1 - jagged 1, TRPS1 - trichorhinophal…
GO:0098916	anterograde trans-synaptic signaling	0.000423	0.153	1.57	14437	216	2259	53	[SLC6A11 - solute carrier family 6 (neurotransmitter transporter), member 11, PARK2 - parkinson protein 2, e3 ubiquitin protein ligase (parkin), GALR2 - galanin receptor 2, SLC6A9 - solute carrier family 6 (neurotransmitter transporter, glycine), member 9, GPR52 - g protein-coupled receptor 52, HRH4 - histamine receptor h4, CHRNB2 - cholinergic receptor, nicotinic, beta 2 (neuronal), CHRNA2 - cho…
GO:0007268	chemical synaptic transmission	0.000423	0.149	1.57	14437	216	2259	53	[SLC6A11 - solute carrier family 6 (neurotransmitter transporter), member 11, PARK2 - parkinson protein 2, e3 ubiquitin protein ligase (parkin), GALR2 - galanin receptor 2, SLC6A9 - solute carrier family 6 (neurotransmitter transporter, glycine), member 9, GPR52 - g protein-coupled receptor 52, HRH4 - histamine receptor h4, CHRNB2 - cholinergic receptor, nicotinic, beta 2 (neuronal), CHRNA2 - cho…
GO:0050907	detection of chemical stimulus involved in sensory perception	0.000469	0.161	2.46	14437	39	2259	15	[TAS2R20 - taste receptor, type 2, member 20, OR1F1 - olfactory receptor, family 1, subfamily f, member 1, GNAT2 - guanine nucleotide binding protein (g protein), alpha transducing activity polypeptide 2, LPO - lactoperoxidase, OR2B11 - olfactory receptor, family 2, subfamily b, member 11, OR2B6 - olfactory receptor, family 2, subfamily b, member 6, OR10P1 - olfactory receptor, family 10, subfami…
GO:0099536	synaptic signaling	0.000476	0.16	1.56	14437	217	2259	53	[SLC6A11 - solute carrier family 6 (neurotransmitter transporter), member 11, PARK2 - parkinson protein 2, e3 ubiquitin protein ligase (parkin), GALR2 - galanin receptor 2, SLC6A9 - solute carrier family 6 (neurotransmitter transporter, glycine), member 9, GPR52 - g protein-coupled receptor 52, HRH4 - histamine receptor h4, CHRNB2 - cholinergic receptor, nicotinic, beta 2 (neuronal), CHRNA2 - cho…
GO:0099537	trans-synaptic signaling	0.000476	0.156	1.56	14437	217	2259	53	[SLC6A11 - solute carrier family 6 (neurotransmitter transporter), member 11, PARK2 - parkinson protein 2, e3 ubiquitin protein ligase (parkin), GALR2 - galanin receptor 2, SLC6A9 - solute carrier family 6 (neurotransmitter transporter, glycine), member 9, GPR52 - g protein-coupled receptor 52, HRH4 - histamine receptor h4, CHRNB2 - cholinergic receptor, nicotinic, beta 2 (neuronal), CHRNA2 - cho…
GO:0034754	cellular hormone metabolic process	0.000525	0.169	2.01	14437	73	2259	23	[PLB1 - phospholipase b1, LHB - luteinizing hormone beta polypeptide, AKR1C3 - aldo-keto reductase family 1, member c3, RDH8 - retinol dehydrogenase 8 (all-trans), PLEKHA1 - pleckstrin homology domain containing, family a (phosphoinositide binding specific) member 1, SHH - sonic hedgehog, AANAT - aralkylamine n-acetyltransferase, AKR1C2 - aldo-keto reductase family 1, member c2, AKR1C1 - aldo-ket…
GO:0048468	cell development	0.00055	0.173	1.37	14437	452	2259	97	[GFAP - glial fibrillary acidic protein, MAGI2 - membrane associated guanylate kinase, ww and pdz domain containing 2, CDK1 - cyclin-dependent kinase 1, MSTN - myostatin, F11R - f11 receptor, LIF - leukemia inhibitory factor, CLEC5A - c-type lectin domain family 5, member a, INHBA - inhibin, beta a, INHBB - inhibin, beta b, TRPS1 - trichorhinophalangeal syndrome i, FLNC - filamin c, gamma, GDF1 -…
GO:0065004	protein-DNA complex assembly	0.000561	0.172	1.64	14437	168	2259	43	[HIST1H3D - histone cluster 1, h3d, HIST1H2BD - histone cluster 1, h2bd, ERCC5 - excision repair cross-complementing rodent repair deficiency, complementation group 5, HIST2H2BF - histone cluster 2, h2bf, H2AFX - h2a histone family, member x, HIST1H4I - histone cluster 1, h4i, HIST1H2BC - histone cluster 1, h2bc, TAF4B - taf4b rna polymerase ii, tata box binding protein (tbp)-associated factor, 1…
GO:0048513	animal organ development	0.000619	0.186	1.24	14437	950	2259	185	[BOK - bcl2-related ovarian killer, LHB - luteinizing hormone beta polypeptide, MDGA1 - mam domain containing glycosylphosphatidylinositol anchor 1, AFF2 - af4/fmr2 family, member 2, SPTA1 - spectrin, alpha, erythrocytic 1 (elliptocytosis 2), LHX1 - lim homeobox 1, CDK1 - cyclin-dependent kinase 1, FLT3 - fms-related tyrosine kinase 3, MSTN - myostatin, APOA2 - apolipoprotein a-ii, RBM15 - rna bi…
GO:0009581	detection of external stimulus	0.000715	0.21	2.01	14437	70	2259	22	[CNGA1 - cyclic nucleotide gated channel alpha 1, ATP2B2 - atpase, ca++ transporting, plasma membrane 2, STRC - stereocilin, TMC1 - transmembrane channel-like 1, PDE6G - phosphodiesterase 6g, cgmp-specific, rod, gamma, ANO3 - anoctamin 3, GNAT2 - guanine nucleotide binding protein (g protein), alpha transducing activity polypeptide 2, PITPNM1 - phosphatidylinositol transfer protein, membrane-asso…
GO:0097485	neuron projection guidance	0.000721	0.208	1.65	14437	155	2259	40	[RPL24 - ribosomal protein l24, SPTA1 - spectrin, alpha, erythrocytic 1 (elliptocytosis 2), RNF165 - ring finger protein 165, LHX1 - lim homeobox 1, SEMA3A - sema domain, immunoglobulin domain (ig), short basic domain, secreted, (semaphorin) 3a, NEO1 - neogenin 1, SHH - sonic hedgehog, KIF26B - kinesin family member 26b, KIF5C - kinesin family member 5c, MYH10 - myosin, heavy chain 10, non-muscle…
GO:0022602	ovulation cycle process	0.000724	0.205	2.13	14437	57	2259	19	[ROBO2 - roundabout, axon guidance receptor, homolog 2 (drosophila), VEGFA - vascular endothelial growth factor a, TGFB2 - transforming growth factor, beta 2, PLEKHA1 - pleckstrin homology domain containing, family a (phosphoinositide binding specific) member 1, TGFB3 - transforming growth factor, beta 3, EREG - epiregulin, MSTN - myostatin, FOXL2 - forkhead box l2, PDGFRA - platelet-derived grow…
GO:0051239	regulation of multicellular organismal process	0.000746	0.207	1.15	14437	2126	2259	383	[HSPA1A - heat shock 70kda protein 1a, GFAP - glial fibrillary acidic protein, BMP2K - bmp2 inducible kinase, GFI1 - growth factor independent 1 transcription repressor, LHX1 - lim homeobox 1, KIF20B - kinesin family member 20b, TNFRSF12A - tumor necrosis factor receptor superfamily, member 12a, MSTN - myostatin, BRCA1 - breast cancer 1, early onset, SPTBN4 - spectrin, beta, non-erythrocytic 4, L…
GO:0006811	ion transport	0.000818	0.222	1.24	14437	938	2259	182	[PARK2 - parkinson protein 2, e3 ubiquitin protein ligase (parkin), TCN1 - transcobalamin i (vitamin b12 binding protein, r binder family), COX6B1 - cytochrome c oxidase subunit vib polypeptide 1 (ubiquitous), APOA2 - apolipoprotein a-ii, PITPNM1 - phosphatidylinositol transfer protein, membrane-associated 1, SLC35G1 - solute carrier family 35, member g1, APOC1 - apolipoprotein c-i, AKR1C1 - aldo…
GO:1903522	regulation of blood circulation	0.00087	0.232	1.54	14437	212	2259	51	[FXYD2 - fxyd domain containing ion transport regulator 2, WDR35 - wd repeat domain 35, ATP2B1 - atpase, ca++ transporting, plasma membrane 1, ATP2B2 - atpase, ca++ transporting, plasma membrane 2, RNF207 - ring finger protein 207, NOS2 - nitric oxide synthase 2, inducible, SPTBN4 - spectrin, beta, non-erythrocytic 4, ATP1A2 - atpase, na+/k+ transporting, alpha 2 polypeptide, ATP1B2 - atpase, na+…
GO:0009582	detection of abiotic stimulus	0.000885	0.231	1.98	14437	71	2259	22	[CNGA1 - cyclic nucleotide gated channel alpha 1, ATP2B2 - atpase, ca++ transporting, plasma membrane 2, STRC - stereocilin, TMC1 - transmembrane channel-like 1, PDE6G - phosphodiesterase 6g, cgmp-specific, rod, gamma, ANO3 - anoctamin 3, GNAT2 - guanine nucleotide binding protein (g protein), alpha transducing activity polypeptide 2, PITPNM1 - phosphatidylinositol transfer protein, membrane-asso…
GO:0048731	system development	0.000916	0.235	1.33	14437	514	2259	107	[PARK2 - parkinson protein 2, e3 ubiquitin protein ligase (parkin), LHX1 - lim homeobox 1, FLT4 - fms-related tyrosine kinase 4, LIF - leukemia inhibitory factor, ENC1 - ectodermal-neural cortex 1 (with btb domain), SPOCK1 - sparc/osteonectin, cwcv and kazal-like domains proteoglycan (testican) 1, INHBA - inhibin, beta a, PBX1 - pre-b-cell leukemia homeobox 1, GDA - guanine deaminase, OSM - oncos…
GO:0098742	cell-cell adhesion via plasma-membrane adhesion molecules	0.000923	0.233	1.67	14437	142	2259	37	[PCDHA1 - protocadherin alpha 1, DSC3 - desmocollin 3, CDHR3 - cadherin-related family member 3, CLDN16 - claudin 16, CDHR4 - cadherin-related family member 4, PCDHGA11 - protocadherin gamma subfamily a, 11, PCDHGC4 - protocadherin gamma subfamily c, 4, CELSR2 - cadherin, egf lag seven-pass g-type receptor 2, TRO - trophinin, SDK2 - sidekick cell adhesion molecule 2, TENM4 - teneurin transmembran…
GO:0048545	response to steroid hormone	0.000943	0.234	1.6	14437	172	2259	43	[AKR1C3 - aldo-keto reductase family 1, member c3, ATP2B1 - atpase, ca++ transporting, plasma membrane 1, GNRH1 - gonadotropin-releasing hormone 1 (luteinizing-releasing hormone), PAQR7 - progestin and adipoq receptor family member vii, APOA2 - apolipoprotein a-ii, MSTN - myostatin, FLT3 - fms-related tyrosine kinase 3, MDK - midkine (neurite growth-promoting factor 2), AANAT - aralkylamine n-ace…

## Sheet: H37Ra 12 Hours
GO Term	Description	P-value	FDR q-value	Enrichment	N	B	n	b	Genes
GO:0007186	G-protein coupled receptor signaling pathway	3.37e-12	4.76e-08	1.78	14437	504	2176	135	[OPRL1 - opiate receptor-like 1, RGS19 - regulator of g-protein signaling 19, LPHN2 - latrophilin 2, OR1F1 - olfactory receptor, family 1, subfamily f, member 1, OR2C1 - olfactory receptor, family 2, subfamily c, member 1, TAS2R10 - taste receptor, type 2, member 10, GPR55 - g protein-coupled receptor 55, EMR1 - egf-like module containing, mucin-like, hormone receptor-like 1, CXCL9 - chemokine (c…
GO:0032501	multicellular organismal process	5.02e-09	3.54e-05	1.27	14437	2308	2176	441	[LHX1 - lim homeobox 1, GDNF - glial cell derived neurotrophic factor, ESRP2 - epithelial splicing regulatory protein 2, PMCH - pro-melanin-concentrating hormone, ABCA4 - atp-binding cassette, sub-family a (abc1), member 4, GCNT2 - glucosaminyl (n-acetyl) transferase 2, i-branching enzyme (i blood group), LCT - lactase, KCNE1L - kcne1-like, CHRNA9 - cholinergic receptor, nicotinic, alpha 9 (neuro…
GO:0023052	signaling	7.22e-09	3.4e-05	1.66	14437	472	2176	118	[OPRL1 - opiate receptor-like 1, PARK2 - parkinson protein 2, e3 ubiquitin protein ligase (parkin), LILRB2 - leukocyte immunoglobulin-like receptor, subfamily b (with tm and itim domains), member 2, LHX1 - lim homeobox 1, FCHSD2 - fch and double sh3 domains 2, CXCL9 - chemokine (c-x-c motif) ligand 9, CORT - cortistatin, INHBA - inhibin, beta a, PMCH - pro-melanin-concentrating hormone, KCNE1L - …
GO:0044700	single organism signaling	9.53e-09	3.37e-05	1.66	14437	469	2176	117	[OPRL1 - opiate receptor-like 1, PARK2 - parkinson protein 2, e3 ubiquitin protein ligase (parkin), LILRB2 - leukocyte immunoglobulin-like receptor, subfamily b (with tm and itim domains), member 2, LHX1 - lim homeobox 1, FCHSD2 - fch and double sh3 domains 2, CXCL9 - chemokine (c-x-c motif) ligand 9, CORT - cortistatin, INHBA - inhibin, beta a, PMCH - pro-melanin-concentrating hormone, KCNE1L - …
GO:0048856	anatomical structure development	2.5e-08	7.06e-05	1.25	14437	2439	2176	458	[GFAP - glial fibrillary acidic protein, SPTA1 - spectrin, alpha, erythrocytic 1 (elliptocytosis 2), LHX1 - lim homeobox 1, GFRA2 - gdnf family receptor alpha 2, GDF9 - growth differentiation factor 9, PITPNM1 - phosphatidylinositol transfer protein, membrane-associated 1, SEPT4 - septin 4, GDNF - glial cell derived neurotrophic factor, WFIKKN1 - wap, follistatin/kazal, immunoglobulin, kunitz and…
GO:0007267	cell-cell signaling	8.16e-07	0.00192	1.59	14437	422	2176	101	[OPRL1 - opiate receptor-like 1, PARK2 - parkinson protein 2, e3 ubiquitin protein ligase (parkin), LILRB2 - leukocyte immunoglobulin-like receptor, subfamily b (with tm and itim domains), member 2, LHX1 - lim homeobox 1, FCHSD2 - fch and double sh3 domains 2, CXCL9 - chemokine (c-x-c motif) ligand 9, CORT - cortistatin, INHBA - inhibin, beta a, PMCH - pro-melanin-concentrating hormone, CHRNA9 - …
GO:0032502	developmental process	9.67e-07	0.00195	1.17	14437	3620	2176	636	[GFAP - glial fibrillary acidic protein, SPTA1 - spectrin, alpha, erythrocytic 1 (elliptocytosis 2), GFI1 - growth factor independent 1 transcription repressor, LHX1 - lim homeobox 1, GFRA2 - gdnf family receptor alpha 2, TNFRSF12A - tumor necrosis factor receptor superfamily, member 12a, PITPNM1 - phosphatidylinositol transfer protein, membrane-associated 1, GDF9 - growth differentiation factor …
GO:0003008	system process	2.83e-06	0.00499	1.37	14437	859	2176	178	[OPRL1 - opiate receptor-like 1, PARK2 - parkinson protein 2, e3 ubiquitin protein ligase (parkin), NCAM2 - neural cell adhesion molecule 2, HSD11B2 - hydroxysteroid (11-beta) dehydrogenase 2, CNTNAP1 - contactin associated protein 1, GDNF - glial cell derived neurotrophic factor, IL12B - interleukin 12b (natural killer cell stimulatory factor 2, cytotoxic lymphocyte maturation factor 2, p40), AB…
GO:0006954	inflammatory response	3.91e-06	0.00614	1.59	14437	362	2176	87	[CCL3L3 - chemokine (c-c motif) ligand 3-like 3, IL18RAP - interleukin 18 receptor accessory protein, AOC3 - amine oxidase, copper containing 3, PTX3 - pentraxin 3, long, CXCL9 - chemokine (c-x-c motif) ligand 9, ORM1 - orosomucoid 1, IL23A - interleukin 23, alpha subunit p19, AGER - advanced glycosylation end product-specific receptor, ORM2 - orosomucoid 2, AOX1 - aldehyde oxidase 1, AOAH - acyl…
GO:0007517	muscle organ development	5.34e-06	0.00755	2.29	14437	87	2176	30	[CHODL - chondrolectin, CENPF - centromere protein f, 350/400kda, ITGB1BP2 - integrin beta 1 binding protein (melusin) 2, FOXL2 - forkhead box l2, LARGE - like-glycosyltransferase, SPEG - speg complex locus, MKL2 - mkl/myocardin-like 2, ITGA11 - integrin, alpha 11, ALX4 - alx homeobox 4, ETV1 - ets variant 1, MKX - mohawk homeobox, ID3 - inhibitor of dna binding 3, dominant negative helix-loop-he…
GO:0006813	potassium ion transport	5.8e-06	0.00745	2.13	14437	109	2176	35	[KCNK5 - potassium channel, subfamily k, member 5, KCNG3 - potassium voltage-gated channel, subfamily g, member 3, CNGA1 - cyclic nucleotide gated channel alpha 1, KCNA3 - potassium voltage-gated channel, shaker-related subfamily, member 3, KCNG2 - potassium voltage-gated channel, subfamily g, member 2, KCNE2 - potassium voltage-gated channel, isk-related family, member 2, ATP1B1 - atpase, na+/k+…
GO:0009887	animal organ morphogenesis	6.61e-06	0.00778	1.58	14437	356	2176	85	[SLC4A10 - solute carrier family 4, sodium bicarbonate transporter, member 10, LHX1 - lim homeobox 1, PAX5 - paired box 5, NEK8 - nima-related kinase 8, FUZ - fuzzy planar cell polarity protein, PAX9 - paired box 9, TLE2 - transducin-like enhancer of split 2 (e(sp1) homolog, drosophila), FOXL2 - forkhead box l2, ETV7 - ets variant 7, TLE3 - transducin-like enhancer of split 3 (e(sp1) homolog, dro…
GO:0061061	muscle structure development	8.99e-06	0.00977	2.24	14437	89	2176	30	[CHODL - chondrolectin, CENPF - centromere protein f, 350/400kda, ITGB1BP2 - integrin beta 1 binding protein (melusin) 2, FOXL2 - forkhead box l2, LARGE - like-glycosyltransferase, SPEG - speg complex locus, MKL2 - mkl/myocardin-like 2, ALX4 - alx homeobox 4, ITGA11 - integrin, alpha 11, ETV1 - ets variant 1, MKX - mohawk homeobox, ID3 - inhibitor of dna binding 3, dominant negative helix-loop-he…
GO:0006342	chromatin silencing	9.02e-06	0.0091	2.49	14437	64	2176	24	[HIST1H3D - histone cluster 1, h3d, HIST1H3C - histone cluster 1, h3c, HIST3H2A - histone cluster 3, h2a, H2AFX - h2a histone family, member x, HIST1H4I - histone cluster 1, h4i, HIST1H2AE - histone cluster 1, h2ae, HIST1H4D - histone cluster 1, h4d, DNMT3A - dna (cytosine-5-)-methyltransferase 3 alpha, HIST1H3J - histone cluster 1, h3j, HIST1H3H - histone cluster 1, h3h, HELLS - helicase, lympho…
GO:0071805	potassium ion transmembrane transport	9.73e-06	0.00916	2.17	14437	98	2176	32	[KCNK5 - potassium channel, subfamily k, member 5, KCNG3 - potassium voltage-gated channel, subfamily g, member 3, CNGA1 - cyclic nucleotide gated channel alpha 1, KCNA3 - potassium voltage-gated channel, shaker-related subfamily, member 3, KCNG2 - potassium voltage-gated channel, subfamily g, member 2, KCNE2 - potassium voltage-gated channel, isk-related family, member 2, ATP1B1 - atpase, na+/k+…
GO:0071804	cellular potassium ion transport	9.73e-06	0.00859	2.17	14437	98	2176	32	[KCNK5 - potassium channel, subfamily k, member 5, KCNG3 - potassium voltage-gated channel, subfamily g, member 3, CNGA1 - cyclic nucleotide gated channel alpha 1, KCNA3 - potassium voltage-gated channel, shaker-related subfamily, member 3, KCNG2 - potassium voltage-gated channel, subfamily g, member 2, ATP1B1 - atpase, na+/k+ transporting, beta 1 polypeptide, KCNE2 - potassium voltage-gated chan…
GO:0006334	nucleosome assembly	1.01e-05	0.0084	2.11	14437	107	2176	34	[HIST1H3D - histone cluster 1, h3d, HIST1H3C - histone cluster 1, h3c, HIST1H2BD - histone cluster 1, h2bd, H2AFX - h2a histone family, member x, HIST1H4I - histone cluster 1, h4i, HIST1H2BC - histone cluster 1, h2bc, HIST1H2BO - histone cluster 1, h2bo, HIST2H2BE - histone cluster 2, h2be, CENPM - centromere protein m, HIST1H1B - histone cluster 1, h1b, HIST1H1E - histone cluster 1, h1e, HIST1H4…
GO:0043269	regulation of ion transport	1.23e-05	0.00967	1.51	14437	431	2176	98	[OPRL1 - opiate receptor-like 1, PARK2 - parkinson protein 2, e3 ubiquitin protein ligase (parkin), LILRB2 - leukocyte immunoglobulin-like receptor, subfamily b (with tm and itim domains), member 2, PLA2R1 - phospholipase a2 receptor 1, 180kda, CXCL9 - chemokine (c-x-c motif) ligand 9, GDNF - glial cell derived neurotrophic factor, PRSS8 - protease, serine, 8, SPINK1 - serine peptidase inhibitor,…
GO:0044767	single-organism developmental process	1.5e-05	0.0111	1.15	14437	3286	2176	572	[GFAP - glial fibrillary acidic protein, SPTA1 - spectrin, alpha, erythrocytic 1 (elliptocytosis 2), GFI1 - growth factor independent 1 transcription repressor, LHX1 - lim homeobox 1, TNFRSF12A - tumor necrosis factor receptor superfamily, member 12a, PITPNM1 - phosphatidylinositol transfer protein, membrane-associated 1, GDF9 - growth differentiation factor 9, GDNF - glial cell derived neurotrop…
GO:0050906	detection of stimulus involved in sensory perception	1.59e-05	0.0113	2.37	14437	70	2176	25	[TAS2R20 - taste receptor, type 2, member 20, KIAA1045 - kiaa1045, OR1F1 - olfactory receptor, family 1, subfamily f, member 1, TAS2R10 - taste receptor, type 2, member 10, OR2C1 - olfactory receptor, family 2, subfamily c, member 1, ITGA2 - integrin, alpha 2 (cd49b, alpha 2 subunit of vla-2 receptor), RTP4 - receptor (chemosensory) transporter protein 4, PKD2L1 - polycystic kidney disease 2-like…
GO:0044707	single-multicellular organism process	1.75e-05	0.0117	1.22	14437	1837	2176	338	[RGS19 - regulator of g-protein signaling 19, LHX1 - lim homeobox 1, PLA2R1 - phospholipase a2 receptor 1, 180kda, TSHZ2 - teashirt zinc finger homeobox 2, BRCA1 - breast cancer 1, early onset, GDNF - glial cell derived neurotrophic factor, ESRP2 - epithelial splicing regulatory protein 2, PMCH - pro-melanin-concentrating hormone, TSSK3 - testis-specific serine kinase 3, ABCA4 - atp-binding casse…
GO:0002251	organ or tissue specific immune response	2.07e-05	0.0133	3.84	14437	19	2176	11	[HIST1H2BC - histone cluster 1, h2bc, FFAR3 - free fatty acid receptor 3, IFNLR1 - interferon, lambda receptor 1, HIST2H2BE - histone cluster 2, h2be, NOS2 - nitric oxide synthase 2, inducible, HIST1H2BJ - histone cluster 1, h2bj, HIST1H2BF - histone cluster 1, h2bf, CAMP - cathelicidin antimicrobial peptide, HIST1H2BG - histone cluster 1, h2bg, LTF - lactotransferrin, IL6 - interleukin 6 (interf…
GO:0048731	system development	2.29e-05	0.014	1.45	14437	514	2176	112	[PARK2 - parkinson protein 2, e3 ubiquitin protein ligase (parkin), SLC4A10 - solute carrier family 4, sodium bicarbonate transporter, member 10, LHX1 - lim homeobox 1, GFRA2 - gdnf family receptor alpha 2, ENC1 - ectodermal-neural cortex 1 (with btb domain), GDNF - glial cell derived neurotrophic factor, WFIKKN1 - wap, follistatin/kazal, immunoglobulin, kunitz and netrin domain containing 1, INH…
GO:0007165	signal transduction	2.72e-05	0.016	1.14	14437	3454	2176	596	[SPTA1 - spectrin, alpha, erythrocytic 1 (elliptocytosis 2), GFRA2 - gdnf family receptor alpha 2, TNFRSF12A - tumor necrosis factor receptor superfamily, member 12a, PITPNM1 - phosphatidylinositol transfer protein, membrane-associated 1, GDF9 - growth differentiation factor 9, AKAP12 - a kinase (prka) anchor protein 12, LIFR - leukemia inhibitory factor receptor alpha, GDNF - glial cell derived …
GO:0034723	DNA replication-dependent nucleosome organization	3.54e-05	0.02	3.46	14437	23	2176	12	[HIST2H4A - histone cluster 2, h4a, HIST1H3D - histone cluster 1, h3d, HIST1H3C - histone cluster 1, h3c, ASF1B - anti-silencing function 1b histone chaperone, HIST1H4I - histone cluster 1, h4i, HIST1H4H - histone cluster 1, h4h, HIST4H4 - histone cluster 4, h4, HIST1H4C - histone cluster 1, h4c, HIST1H4J - histone cluster 1, h4j, HIST1H4D - histone cluster 1, h4d, HIST1H3J - histone cluster 1, h…
GO:0006335	DNA replication-dependent nucleosome assembly	3.54e-05	0.0193	3.46	14437	23	2176	12	[HIST2H4A - histone cluster 2, h4a, HIST1H3D - histone cluster 1, h3d, HIST1H3C - histone cluster 1, h3c, ASF1B - anti-silencing function 1b histone chaperone, HIST1H4I - histone cluster 1, h4i, HIST1H4H - histone cluster 1, h4h, HIST1H4C - histone cluster 1, h4c, HIST4H4 - histone cluster 4, h4, HIST1H4J - histone cluster 1, h4j, HIST1H4D - histone cluster 1, h4d, HIST1H3J - histone cluster 1, h…
GO:0002385	mucosal immune response	4.16e-05	0.0217	3.9	14437	17	2176	10	[HIST1H2BC - histone cluster 1, h2bc, FFAR3 - free fatty acid receptor 3, IFNLR1 - interferon, lambda receptor 1, HIST2H2BE - histone cluster 2, h2be, NOS2 - nitric oxide synthase 2, inducible, HIST1H2BJ - histone cluster 1, h2bj, HIST1H2BF - histone cluster 1, h2bf, CAMP - cathelicidin antimicrobial peptide, HIST1H2BG - histone cluster 1, h2bg, LTF - lactotransferrin]
GO:0009581	detection of external stimulus	5.05e-05	0.0255	2.27	14437	70	2176	24	[GNGT1 - guanine nucleotide binding protein (g protein), gamma transducing activity polypeptide 1, CNGA1 - cyclic nucleotide gated channel alpha 1, KIAA1045 - kiaa1045, TMC1 - transmembrane channel-like 1, PDE6G - phosphodiesterase 6g, cgmp-specific, rod, gamma, PITPNM1 - phosphatidylinositol transfer protein, membrane-associated 1, ITGA2 - integrin, alpha 2 (cd49b, alpha 2 subunit of vla-2 recep…
GO:0007154	cell communication	5.55e-05	0.027	1.39	14437	586	2176	123	[OPRL1 - opiate receptor-like 1, PARK2 - parkinson protein 2, e3 ubiquitin protein ligase (parkin), LILRB2 - leukocyte immunoglobulin-like receptor, subfamily b (with tm and itim domains), member 2, LHX1 - lim homeobox 1, FCHSD2 - fch and double sh3 domains 2, CXCL9 - chemokine (c-x-c motif) ligand 9, CORT - cortistatin, INHBA - inhibin, beta a, PMCH - pro-melanin-concentrating hormone, INHBB - i…
GO:0009582	detection of abiotic stimulus	6.55e-05	0.0308	2.24	14437	71	2176	24	[GNGT1 - guanine nucleotide binding protein (g protein), gamma transducing activity polypeptide 1, CNGA1 - cyclic nucleotide gated channel alpha 1, KIAA1045 - kiaa1045, TMC1 - transmembrane channel-like 1, PDE6G - phosphodiesterase 6g, cgmp-specific, rod, gamma, PITPNM1 - phosphatidylinositol transfer protein, membrane-associated 1, ITGA2 - integrin, alpha 2 (cd49b, alpha 2 subunit of vla-2 recep…
GO:0048869	cellular developmental process	6.7e-05	0.0305	1.2	14437	1940	2176	350	[GFAP - glial fibrillary acidic protein, RGS19 - regulator of g-protein signaling 19, GFI1 - growth factor independent 1 transcription repressor, BNIP3 - bcl2/adenovirus e1b 19kda interacting protein 3, SIX5 - six homeobox 5, LHX1 - lim homeobox 1, CTTN - cortactin, PLA2R1 - phospholipase a2 receptor 1, 180kda, BRCA2 - breast cancer 2, early onset, GDF9 - growth differentiation factor 9, PLD6 - p…
GO:0051606	detection of stimulus	6.74e-05	0.0298	1.74	14437	179	2176	47	[GNGT1 - guanine nucleotide binding protein (g protein), gamma transducing activity polypeptide 1, RFC4 - replication factor c (activator 1) 4, 37kda, CNGA1 - cyclic nucleotide gated channel alpha 1, TAS2R20 - taste receptor, type 2, member 20, OR1F1 - olfactory receptor, family 1, subfamily f, member 1, KIAA1045 - kiaa1045, PDE6G - phosphodiesterase 6g, cgmp-specific, rod, gamma, TAS2R10 - taste…
GO:0098813	nuclear chromosome segregation	7.25e-05	0.031	2.84	14437	35	2176	15	[PLK1 - polo-like kinase 1, NEK2 - nima-related kinase 2, MAD2L1 - mad2 mitotic arrest deficient-like 1 (yeast), M1AP - meiosis 1 associated protein, SGOL1 - shugoshin-like 1 (s. pombe), NUSAP1 - nucleolar and spindle associated protein 1, NDC80 - ndc80 kinetochore complex component, TTK - ttk protein kinase, KIF25 - kinesin family member 25, KIFC1 - kinesin family member c1, TOP2A - topoisomeras…
GO:0050909	sensory perception of taste	8.09e-05	0.0336	3.69	14437	18	2176	10	[WNT10B - wingless-type mmtv integration site family, member 10b, TAS2R4 - taste receptor, type 2, member 4, PLCB2 - phospholipase c, beta 2, PKD2L1 - polycystic kidney disease 2-like 1, LEF1 - lymphoid enhancer-binding factor 1, TAS1R3 - taste receptor, type 1, member 3, CALHM1 - calcium homeostasis modulator 1, TAS2R5 - taste receptor, type 2, member 5, REEP2 - receptor accessory protein 2, SCN…
GO:0050877	neurological system process	8.45e-05	0.0341	1.41	14437	507	2176	108	[OPRL1 - opiate receptor-like 1, PARK2 - parkinson protein 2, e3 ubiquitin protein ligase (parkin), NCAM2 - neural cell adhesion molecule 2, CNTNAP1 - contactin associated protein 1, IL12B - interleukin 12b (natural killer cell stimulatory factor 2, cytotoxic lymphocyte maturation factor 2, p40), ABCA4 - atp-binding cassette, sub-family a (abc1), member 4, EPAS1 - endothelial pas domain protein 1…
GO:0034765	regulation of ion transmembrane transport	9.98e-05	0.0392	1.56	14437	285	2176	67	[KCNK5 - potassium channel, subfamily k, member 5, OPRL1 - opiate receptor-like 1, DRD4 - dopamine receptor d4, WNK4 - wnk lysine deficient protein kinase 4, CXCL9 - chemokine (c-x-c motif) ligand 9, ATP1B1 - atpase, na+/k+ transporting, beta 1 polypeptide, KCNE2 - potassium voltage-gated channel, isk-related family, member 2, CASQ1 - calsequestrin 1 (fast-twitch, skeletal muscle), FLNA - filamin…
GO:0007204	positive regulation of cytosolic calcium ion concentration	0.000101	0.0385	1.79	14437	152	2176	41	[CCR4 - chemokine (c-c motif) receptor 4, OPRL1 - opiate receptor-like 1, CCR5 - chemokine (c-c motif) receptor 5 (gene/pseudogene), TRPV4 - transient receptor potential cation channel, subfamily v, member 4, C5AR2 - complement component 5a receptor 2, PROK2 - prokineticin 2, GPR55 - g protein-coupled receptor 55, FAM155B - family with sequence similarity 155, member b, GALR1 - galanin receptor 1…
GO:0042476	odontogenesis	0.000108	0.0401	2.18	14437	73	2176	24	[SLC24A4 - solute carrier family 24 (sodium/potassium/calcium exchanger), member 4, ID3 - inhibitor of dna binding 3, dominant negative helix-loop-helix protein, BGLAP - bone gamma-carboxyglutamate (gla) protein, TGFB3 - transforming growth factor, beta 3, BCL11B - b-cell cll/lymphoma 11b (zinc finger protein), TUFT1 - tuftelin 1, DLX1 - distal-less homeobox 1, SHH - sonic hedgehog, FGF10 - fibro…
GO:0060078	regulation of postsynaptic membrane potential	0.000126	0.0456	2.97	14437	29	2176	13	[GRIK5 - glutamate receptor, ionotropic, kainate 5, DGKI - diacylglycerol kinase, iota, DRD4 - dopamine receptor d4, SCN1B - sodium channel, voltage-gated, type i, beta subunit, CHRNA3 - cholinergic receptor, nicotinic, alpha 3 (neuronal), GRIN2C - glutamate receptor, ionotropic, n-methyl d-aspartate 2c, SEZ6 - seizure related 6 homolog (mouse), ADORA1 - adenosine a1 receptor, HCN4 - hyperpolariz…
GO:0030198	extracellular matrix organization	0.000139	0.0493	1.62	14437	225	2176	55	[GFAP - glial fibrillary acidic protein, ITGA10 - integrin, alpha 10, ADAMTSL2 - adamts-like 2, ADAMTS5 - adam metallopeptidase with thrombospondin type 1 motif, 5, KDR - kinase insert domain receptor (a type iii receptor tyrosine kinase), CCDC80 - coiled-coil domain containing 80, COL14A1 - collagen, type xiv, alpha 1, MMP1 - matrix metallopeptidase 1 (interstitial collagenase), CSGALNACT1 - cho…
GO:0070098	chemokine-mediated signaling pathway	0.000146	0.0502	2.33	14437	57	2176	20	[CCR4 - chemokine (c-c motif) receptor 4, CCR5 - chemokine (c-c motif) receptor 5 (gene/pseudogene), XCR1 - chemokine (c motif) receptor 1, CCL19 - chemokine (c-c motif) ligand 19, CCL3L3 - chemokine (c-c motif) ligand 3-like 3, CCL8 - chemokine (c-c motif) ligand 8, CXCL9 - chemokine (c-x-c motif) ligand 9, CCL7 - chemokine (c-c motif) ligand 7, GPR17 - g protein-coupled receptor 17, CCL2 - chem…
GO:0051239	regulation of multicellular organismal process	0.000149	0.05	1.18	14437	2126	2176	377	[HSPA1A - heat shock 70kda protein 1a, GFAP - glial fibrillary acidic protein, HSPA1B - heat shock 70kda protein 1b, BMP2K - bmp2 inducible kinase, LILRB2 - leukocyte immunoglobulin-like receptor, subfamily b (with tm and itim domains), member 2, GFI1 - growth factor independent 1 transcription repressor, LHX1 - lim homeobox 1, CTTN - cortactin, TNFRSF12A - tumor necrosis factor receptor superfam…
GO:0050729	positive regulation of inflammatory response	0.00015	0.0493	1.98	14437	97	2176	29	[TRPV4 - transient receptor potential cation channel, subfamily v, member 4, CCL3L3 - chemokine (c-c motif) ligand 3-like 3, FFAR3 - free fatty acid receptor 3, FABP4 - fatty acid binding protein 4, adipocyte, ITGA2 - integrin, alpha 2 (cd49b, alpha 2 subunit of vla-2 receptor), IL12B - interleukin 12b (natural killer cell stimulatory factor 2, cytotoxic lymphocyte maturation factor 2, p40), PTGE…
GO:0043062	extracellular structure organization	0.000158	0.0507	1.61	14437	226	2176	55	[GFAP - glial fibrillary acidic protein, ITGA10 - integrin, alpha 10, ADAMTSL2 - adamts-like 2, ADAMTS5 - adam metallopeptidase with thrombospondin type 1 motif, 5, KDR - kinase insert domain receptor (a type iii receptor tyrosine kinase), CCDC80 - coiled-coil domain containing 80, COL14A1 - collagen, type xiv, alpha 1, MMP1 - matrix metallopeptidase 1 (interstitial collagenase), CSGALNACT1 - cho…
GO:0002227	innate immune response in mucosa	0.000166	0.0521	4.08	14437	13	2176	8	[HIST1H2BC - histone cluster 1, h2bc, HIST2H2BE - histone cluster 2, h2be, NOS2 - nitric oxide synthase 2, inducible, HIST1H2BJ - histone cluster 1, h2bj, HIST1H2BF - histone cluster 1, h2bf, CAMP - cathelicidin antimicrobial peptide, HIST1H2BG - histone cluster 1, h2bg, LTF - lactotransferrin]
GO:0007187	G-protein coupled receptor signaling pathway, coupled to cyclic nucleotide second messenger	0.000171	0.0525	1.92	14437	107	2176	31	[OPRL1 - opiate receptor-like 1, FFAR3 - free fatty acid receptor 3, DRD4 - dopamine receptor d4, GALR1 - galanin receptor 1, CHRM3 - cholinergic receptor, muscarinic 3, CCR1 - chemokine (c-c motif) receptor 1, CHRM5 - cholinergic receptor, muscarinic 5, CCR3 - chemokine (c-c motif) receptor 3, PTGER1 - prostaglandin e receptor 1 (subtype ep1), 42kda, CORT - cortistatin, RXFP2 - relaxin/insulin-l…
GO:0034762	regulation of transmembrane transport	0.000205	0.0615	1.52	14437	297	2176	68	[KCNK5 - potassium channel, subfamily k, member 5, OPRL1 - opiate receptor-like 1, DRD4 - dopamine receptor d4, WNK4 - wnk lysine deficient protein kinase 4, CXCL9 - chemokine (c-x-c motif) ligand 9, ATP1B1 - atpase, na+/k+ transporting, beta 1 polypeptide, KCNE2 - potassium voltage-gated channel, isk-related family, member 2, CASQ1 - calsequestrin 1 (fast-twitch, skeletal muscle), FLNA - filamin…
GO:0007193	adenylate cyclase-inhibiting G-protein coupled receptor signaling pathway	0.000214	0.0629	2.39	14437	50	2176	18	[OPRL1 - opiate receptor-like 1, DRD4 - dopamine receptor d4, FFAR3 - free fatty acid receptor 3, GRM2 - glutamate receptor, metabotropic 2, CHRM3 - cholinergic receptor, muscarinic 3, CHRM5 - cholinergic receptor, muscarinic 5, CORT - cortistatin, RXFP2 - relaxin/insulin-like family peptide receptor 2, GRM4 - glutamate receptor, metabotropic 4, FLNA - filamin a, alpha, ADORA1 - adenosine a1 rece…
GO:0071346	cellular response to interferon-gamma	0.000221	0.0637	2.45	14437	46	2176	17	[CCL19 - chemokine (c-c motif) ligand 19, CCL3L3 - chemokine (c-c motif) ligand 3-like 3, STAR - steroidogenic acute regulatory protein, NOS2 - nitric oxide synthase 2, inducible, HLA-DPA1 - major histocompatibility complex, class ii, dp alpha 1, CCL8 - chemokine (c-c motif) ligand 8, ADAMTS13 - adam metallopeptidase with thrombospondin type 1 motif, 13, CCL7 - chemokine (c-c motif) ligand 7, CCL…
GO:0048513	animal organ development	0.000238	0.0672	1.27	14437	950	2176	182	[SPTA1 - spectrin, alpha, erythrocytic 1 (elliptocytosis 2), LHX1 - lim homeobox 1, CDK1 - cyclin-dependent kinase 1, BRCA2 - breast cancer 2, early onset, PITPNM1 - phosphatidylinositol transfer protein, membrane-associated 1, EML1 - echinoderm microtubule associated protein like 1, FOXL2 - forkhead box l2, GDNF - glial cell derived neurotrophic factor, SEPT4 - septin 4, SPEG - speg complex locu…
GO:0045814	negative regulation of gene expression, epigenetic	0.000242	0.0671	2.05	14437	81	2176	25	[HIST1H3D - histone cluster 1, h3d, HIST1H3C - histone cluster 1, h3c, HIST1H4I - histone cluster 1, h4i, H2AFX - h2a histone family, member x, HIST1H2AE - histone cluster 1, h2ae, HIST1H4D - histone cluster 1, h4d, HIST1H3J - histone cluster 1, h3j, HIST1H3H - histone cluster 1, h3h, HIST1H2AM - histone cluster 1, h2am, HIST2H2AC - histone cluster 2, h2ac, HIST2H2AA3 - histone cluster 2, h2aa3, …
GO:2000241	regulation of reproductive process	0.000306	0.0831	1.94	14437	96	2176	28	[NOX5 - nadph oxidase, ef-hand calcium binding domain 5, CDC20 - cell division cycle 20, SHH - sonic hedgehog, GDF9 - growth differentiation factor 9, PTGDS - prostaglandin d2 synthase 21kda (brain), NPM2 - nucleophosmin/nucleoplasmin 2, SPINK2 - serine peptidase inhibitor, kazal type 2 (acrosin-trypsin inhibitor), ASTL - astacin-like metallo-endopeptidase (m12 family), INHBA - inhibin, beta a, S…
GO:0006811	ion transport	0.000328	0.0874	1.27	14437	938	2176	179	[PARK2 - parkinson protein 2, e3 ubiquitin protein ligase (parkin), SLC4A10 - solute carrier family 4, sodium bicarbonate transporter, member 10, PITPNM1 - phosphatidylinositol transfer protein, membrane-associated 1, SLC34A3 - solute carrier family 34 (type ii sodium/phosphate contransporter), member 3, TRPC3 - transient receptor potential cation channel, subfamily c, member 3, ANO8 - anoctamin …
GO:0086001	cardiac muscle cell action potential	0.00033	0.0863	3.04	14437	24	2176	11	[DMD - dystrophin, GJA1 - gap junction protein, alpha 1, 43kda, HCN4 - hyperpolarization activated cyclic nucleotide-gated potassium channel 4, KCNE1L - kcne1-like, SCN1B - sodium channel, voltage-gated, type i, beta subunit, PKP2 - plakophilin 2, GJA5 - gap junction protein, alpha 5, 40kda, SCN4B - sodium channel, voltage-gated, type iv, beta subunit, KCNQ1 - potassium voltage-gated channel, kqt…
GO:0009617	response to bacterium	0.000335	0.086	1.74	14437	145	2176	38	[CCR4 - chemokine (c-c motif) receptor 4, CLEC4D - c-type lectin domain family 4, member d, HIST1H2BC - histone cluster 1, h2bc, HIST2H2BE - histone cluster 2, h2be, NOS2 - nitric oxide synthase 2, inducible, CAMP - cathelicidin antimicrobial peptide, ADAMTS5 - adam metallopeptidase with thrombospondin type 1 motif, 5, IL12B - interleukin 12b (natural killer cell stimulatory factor 2, cytotoxic l…
GO:0048468	cell development	0.00036	0.0909	1.39	14437	452	2176	95	[GFAP - glial fibrillary acidic protein, C17orf104 - chromosome 17 open reading frame 104, GNGT1 - guanine nucleotide binding protein (g protein), gamma transducing activity polypeptide 1, MAGI2 - membrane associated guanylate kinase, ww and pdz domain containing 2, SLC4A10 - solute carrier family 4, sodium bicarbonate transporter, member 10, CRB1 - crumbs homolog 1 (drosophila), NUP210L - nucleo…
GO:0033993	response to lipid	0.000378	0.0936	1.35	14437	572	2176	116	[OPRL1 - opiate receptor-like 1, LILRB2 - leukocyte immunoglobulin-like receptor, subfamily b (with tm and itim domains), member 2, GFI1 - growth factor independent 1 transcription repressor, AANAT - aralkylamine n-acetyltransferase, PAQR9 - progestin and adipoq receptor family member ix, HSD11B2 - hydroxysteroid (11-beta) dehydrogenase 2, CXCL9 - chemokine (c-x-c motif) ligand 9, IL12B - interle…
GO:0034728	nucleosome organization	0.000382	0.0931	1.77	14437	131	2176	35	[HIST1H3D - histone cluster 1, h3d, HIST1H3C - histone cluster 1, h3c, HIST1H2BD - histone cluster 1, h2bd, H2AFX - h2a histone family, member x, HIST1H4I - histone cluster 1, h4i, HIST1H2BC - histone cluster 1, h2bc, HIST1H2BO - histone cluster 1, h2bo, HIST2H2BE - histone cluster 2, h2be, CENPM - centromere protein m, HIST1H1B - histone cluster 1, h1b, HIST1H1E - histone cluster 1, h1e, HIST1H4…
GO:0000819	sister chromatid segregation	0.000383	0.0916	2.84	14437	28	2176	12	[KIFC1 - kinesin family member c1, PLK1 - polo-like kinase 1, TOP2A - topoisomerase (dna) ii alpha 170kda, NEK2 - nima-related kinase 2, MAD2L1 - mad2 mitotic arrest deficient-like 1 (yeast), ZWINT - zw10 interacting kinetochore protein, KIF18B - kinesin family member 18b, ESPL1 - extra spindle pole bodies homolog 1 (s. cerevisiae), NUSAP1 - nucleolar and spindle associated protein 1, NDC80 - ndc…
GO:1900003	regulation of serine-type endopeptidase activity	0.000407	0.0957	5.53	14437	6	2176	5	[SPINK2 - serine peptidase inhibitor, kazal type 2 (acrosin-trypsin inhibitor), SPINK1 - serine peptidase inhibitor, kazal type 1, SPINK9 - serine peptidase inhibitor, kazal type 9, SEMG1 - semenogelin i, SEMG2 - semenogelin ii]
GO:1902571	regulation of serine-type peptidase activity	0.000407	0.0942	5.53	14437	6	2176	5	[SPINK2 - serine peptidase inhibitor, kazal type 2 (acrosin-trypsin inhibitor), SPINK1 - serine peptidase inhibitor, kazal type 1, SPINK9 - serine peptidase inhibitor, kazal type 9, SEMG1 - semenogelin i, SEMG2 - semenogelin ii]
GO:0007600	sensory perception	0.000488	0.111	1.5	14437	284	2176	64	[OPRL1 - opiate receptor-like 1, ALOXE3 - arachidonate lipoxygenase 3, NCAM2 - neural cell adhesion molecule 2, TIMP3 - timp metallopeptidase inhibitor 3, TJP1 - tight junction protein 1, MYO3B - myosin iiib, IL12B - interleukin 12b (natural killer cell stimulatory factor 2, cytotoxic lymphocyte maturation factor 2, p40), WNT10B - wingless-type mmtv integration site family, member 10b, PRCD - pro…
GO:0000070	mitotic sister chromatid segregation	0.000509	0.114	2.92	14437	25	2176	11	[KIFC1 - kinesin family member c1, PLK1 - polo-like kinase 1, NEK2 - nima-related kinase 2, MAD2L1 - mad2 mitotic arrest deficient-like 1 (yeast), ZWINT - zw10 interacting kinetochore protein, KIF18B - kinesin family member 18b, ESPL1 - extra spindle pole bodies homolog 1 (s. cerevisiae), NUSAP1 - nucleolar and spindle associated protein 1, NDC80 - ndc80 kinetochore complex component, ZNF207 - zi…
GO:0090131	mesenchyme migration	0.000515	0.114	6.63	14437	4	2176	4	[ACTA2 - actin, alpha 2, smooth muscle, aorta, ACTA1 - actin, alpha 1, skeletal muscle, FOXF1 - forkhead box f1, ACTG2 - actin, gamma 2, smooth muscle, enteric]
GO:0006955	immune response	0.000553	0.12	1.3	14437	682	2176	134	[LAX1 - lymphocyte transmembrane adaptor 1, LILRB2 - leukocyte immunoglobulin-like receptor, subfamily b (with tm and itim domains), member 2, AIRE - autoimmune regulator, IL18RAP - interleukin 18 receptor accessory protein, CIITA - class ii, major histocompatibility complex, transactivator, EMR1 - egf-like module containing, mucin-like, hormone receptor-like 1, PAX5 - paired box 5, CXCL9 - chemo…
GO:0007606	sensory perception of chemical stimulus	0.000556	0.119	2.36	14437	45	2176	16	[SLC24A4 - solute carrier family 24 (sodium/potassium/calcium exchanger), member 4, NCAM2 - neural cell adhesion molecule 2, OR2B6 - olfactory receptor, family 2, subfamily b, member 6, WNT10B - wingless-type mmtv integration site family, member 10b, TAS2R4 - taste receptor, type 2, member 4, PLCB2 - phospholipase c, beta 2, PKD2L1 - polycystic kidney disease 2-like 1, LEF1 - lymphoid enhancer-bi…
GO:0086091	regulation of heart rate by cardiac conduction	0.000564	0.119	2.75	14437	29	2176	12	[KCND3 - potassium voltage-gated channel, shal-related subfamily, member 3, HCN4 - hyperpolarization activated cyclic nucleotide-gated potassium channel 4, KCNE1L - kcne1-like, SCN1B - sodium channel, voltage-gated, type i, beta subunit, KCNJ5 - potassium inwardly-rectifying channel, subfamily j, member 5, GJA5 - gap junction protein, alpha 5, 40kda, PKP2 - plakophilin 2, KCNJ2 - potassium inward…
GO:0060688	regulation of morphogenesis of a branching structure	0.00058	0.12	2.43	14437	41	2176	15	[LHX1 - lim homeobox 1, SHH - sonic hedgehog, FGF10 - fibroblast growth factor 10, HOXD13 - homeobox d13, PGF - placental growth factor, SHOX2 - short stature homeobox 2, GDNF - glial cell derived neurotrophic factor, SIX2 - six homeobox 2, FGF7 - fibroblast growth factor 7, SNAI2 - snail family zinc finger 2, HGF - hepatocyte growth factor (hepapoietin a; scatter factor), ESR1 - estrogen recepto…
GO:0080154	regulation of fertilization	0.000625	0.128	3.54	14437	15	2176	8	[ASTL - astacin-like metallo-endopeptidase (m12 family), SPINK2 - serine peptidase inhibitor, kazal type 2 (acrosin-trypsin inhibitor), SPINK1 - serine peptidase inhibitor, kazal type 1, NOX5 - nadph oxidase, ef-hand calcium binding domain 5, ZP3 - zona pellucida glycoprotein 3 (sperm receptor), OVGP1 - oviductal glycoprotein 1, 120kda, RNASE10 - ribonuclease, rnase a family, 10 (non-active), CAC…
GO:0006952	defense response	0.000668	0.135	1.28	14437	785	2176	151	[LILRB2 - leukocyte immunoglobulin-like receptor, subfamily b (with tm and itim domains), member 2, BNIP3 - bcl2/adenovirus e1b 19kda interacting protein 3, IL18RAP - interleukin 18 receptor accessory protein, CXCL9 - chemokine (c-x-c motif) ligand 9, ORM1 - orosomucoid 1, IL12B - interleukin 12b (natural killer cell stimulatory factor 2, cytotoxic lymphocyte maturation factor 2, p40), CLEC4A - c…
GO:0061337	cardiac conduction	0.000684	0.136	2.26	14437	50	2176	17	[KCNIP3 - kv channel interacting protein 3, calsenilin, SCN1B - sodium channel, voltage-gated, type i, beta subunit, KCNJ5 - potassium inwardly-rectifying channel, subfamily j, member 5, GJA5 - gap junction protein, alpha 5, 40kda, KCNJ2 - potassium inwardly-rectifying channel, subfamily j, member 2, CACNA2D3 - calcium channel, voltage-dependent, alpha 2/delta subunit 3, JUP - junction plakoglobi…
GO:0042523	positive regulation of tyrosine phosphorylation of Stat5 protein	0.000688	0.135	3.87	14437	12	2176	7	[IL23A - interleukin 23, alpha subunit p19, CSF2 - colony stimulating factor 2 (granulocyte-macrophage), IGF1 - insulin-like growth factor 1 (somatomedin c), KIT - v-kit hardy-zuckerman 4 feline sarcoma viral oncogene homolog, IL31RA - interleukin 31 receptor a, IL12B - interleukin 12b (natural killer cell stimulatory factor 2, cytotoxic lymphocyte maturation factor 2, p40), IL23R - interleukin 2…
GO:0042573	retinoic acid metabolic process	0.000688	0.133	3.87	14437	12	2176	7	[ALDH1A3 - aldehyde dehydrogenase 1 family, member a3, BCO2 - beta-carotene oxygenase 2, ALDH1A2 - aldehyde dehydrogenase 1 family, member a2, CYP1A1 - cytochrome p450, family 1, subfamily a, polypeptide 1, CRABP2 - cellular retinoic acid binding protein 2, CYP26B1 - cytochrome p450, family 26, subfamily b, polypeptide 1, RBP1 - retinol binding protein 1, cellular]
GO:0007059	chromosome segregation	0.000698	0.133	1.9	14437	91	2176	26	[NEK2 - nima-related kinase 2, NEK6 - nima-related kinase 6, NUF2 - nuf2, ndc80 kinetochore complex component, SGOL1 - shugoshin-like 1 (s. pombe), CENPF - centromere protein f, 350/400kda, BRCA1 - breast cancer 1, early onset, ESCO2 - establishment of sister chromatid cohesion n-acetyltransferase 2, TOP2A - topoisomerase (dna) ii alpha 170kda, ZWINT - zw10 interacting kinetochore protein, ESPL1 …
GO:0051046	regulation of secretion	0.000752	0.142	1.34	14437	536	2176	108	[OPRL1 - opiate receptor-like 1, PARK2 - parkinson protein 2, e3 ubiquitin protein ligase (parkin), PLA2R1 - phospholipase a2 receptor 1, 180kda, GDF9 - growth differentiation factor 9, GDNF - glial cell derived neurotrophic factor, FOXL2 - forkhead box l2, SDC4 - syndecan 4, INHBA - inhibin, beta a, INHBB - inhibin, beta b, OSM - oncostatin m, RABGEF1 - rab guanine nucleotide exchange factor (ge…
GO:0000183	chromatin silencing at rDNA	0.000764	0.142	2.81	14437	26	2176	11	[HIST2H4A - histone cluster 2, h4a, HIST1H3D - histone cluster 1, h3d, HIST1H3C - histone cluster 1, h3c, HIST1H4I - histone cluster 1, h4i, HIST1H4H - histone cluster 1, h4h, HIST4H4 - histone cluster 4, h4, HIST1H4C - histone cluster 1, h4c, HIST1H4J - histone cluster 1, h4j, HIST1H4D - histone cluster 1, h4d, HIST1H3J - histone cluster 1, h3j, HIST1H3H - histone cluster 1, h3h]
GO:0042742	defense response to bacterium	0.000808	0.148	1.74	14437	126	2176	33	[CLEC4D - c-type lectin domain family 4, member d, HIST1H2BC - histone cluster 1, h2bc, HIST2H2BE - histone cluster 2, h2be, NOS2 - nitric oxide synthase 2, inducible, CAMP - cathelicidin antimicrobial peptide, ADAMTS5 - adam metallopeptidase with thrombospondin type 1 motif, 5, IL12B - interleukin 12b (natural killer cell stimulatory factor 2, cytotoxic lymphocyte maturation factor 2, p40), IL23…
GO:0070193	synaptonemal complex organization	0.000866	0.157	3.14	14437	19	2176	9	[SYCE1L - synaptonemal complex central element protein 1-like, C17orf104 - chromosome 17 open reading frame 104, TRIP13 - thyroid hormone receptor interactor 13, PLK1 - polo-like kinase 1, SYCE2 - synaptonemal complex central element protein 2, AGO4 - argonaute risc catalytic component 4, SYCP1 - synaptonemal complex protein 1, SYCP2 - synaptonemal complex protein 2, TEX12 - testis expressed 12]
GO:0030278	regulation of ossification	0.000909	0.163	1.67	14437	147	2176	37	[BMP2K - bmp2 inducible kinase, PHOSPHO1 - phosphatase, orphan 1, KL - klotho, DDR2 - discoidin domain receptor tyrosine kinase 2, TMEM119 - transmembrane protein 119, CCR1 - chemokine (c-c motif) receptor 1, LRP4 - low density lipoprotein receptor-related protein 4, WNT10B - wingless-type mmtv integration site family, member 10b, PBX1 - pre-b-cell leukemia homeobox 1, ENPP1 - ectonucleotide pyro…
GO:0046717	acid secretion	0.00092	0.162	2.1	14437	60	2176	19	[BDKRB2 - bradykinin receptor b2, DRD4 - dopamine receptor d4, NOS2 - nitric oxide synthase 2, inducible, CPLX1 - complexin 1, SLC26A7 - solute carrier family 26 (anion exchanger), member 7, GLS2 - glutaminase 2 (liver, mitochondrial), SLC1A7 - solute carrier family 1 (glutamate transporter), member 7, GRM2 - glutamate receptor, metabotropic 2, SYT1 - synaptotagmin i, SLC1A2 - solute carrier fami…
GO:0001508	action potential	0.000959	0.167	2.26	14437	47	2176	16	[SCN1B - sodium channel, voltage-gated, type i, beta subunit, GJA5 - gap junction protein, alpha 5, 40kda, CACNA1I - calcium channel, voltage-dependent, t type, alpha 1i subunit, KCNJ2 - potassium inwardly-rectifying channel, subfamily j, member 2, CNTNAP1 - contactin associated protein 1, GNAQ - guanine nucleotide binding protein (g protein), q polypeptide, KCNE2 - potassium voltage-gated channe…
GO:0048565	digestive tract development	0.000959	0.165	2.26	14437	47	2176	16	[TGFB3 - transforming growth factor, beta 3, FAT4 - fat atypical cadherin 4, FOXF2 - forkhead box f2, FOXF1 - forkhead box f1, PCSK5 - proprotein convertase subtilisin/kexin type 5, RARB - retinoic acid receptor, beta, CLMP - cxadr-like membrane protein, EGFR - epidermal growth factor receptor, CCNB1 - cyclin b1, TRPS1 - trichorhinophalangeal syndrome i, ALX4 - alx homeobox 4, ALDH1A2 - aldehyde …

## Sheet: H37Ra 24 Hours
GO Term	Description	P-value	FDR q-value	Enrichment	N	B	n	b	Genes
GO:0006952	defense response	1.79e-11	2.53e-07	1.52	14437	785	2587	214	[LILRB2 - leukocyte immunoglobulin-like receptor, subfamily b (with tm and itim domains), member 2, BNIP3 - bcl2/adenovirus e1b 19kda interacting protein 3, BNIP3L - bcl2/adenovirus e1b 19kda interacting protein 3-like, DHX58 - dexh (asp-glu-x-his) box polypeptide 58, BLNK - b-cell linker, SH2D1B - sh2 domain containing 1b, PMAIP1 - phorbol-12-myristate-13-acetate-induced protein 1, PML - promyel…
GO:0032501	multicellular organismal process	2.39e-11	1.69e-07	1.28	14437	2308	2587	528	[NPAS4 - neuronal pas domain protein 4, PHF21A - phd finger protein 21a, SPTBN4 - spectrin, beta, non-erythrocytic 4, LIF - leukemia inhibitory factor, GDNF - glial cell derived neurotrophic factor, ESRP2 - epithelial splicing regulatory protein 2, PML - promyelocytic leukemia, SPARC - secreted protein, acidic, cysteine-rich (osteonectin), REEP2 - receptor accessory protein 2, CHRNA9 - cholinergi…
GO:0003008	system process	2.52e-09	1.18e-05	1.44	14437	859	2587	221	[EMP2 - epithelial membrane protein 2, GALR2 - galanin receptor 2, NPAS4 - neuronal pas domain protein 4, SPTBN4 - spectrin, beta, non-erythrocytic 4, GDNF - glial cell derived neurotrophic factor, BTC - betacellulin, AMN - amnion associated transmembrane protein, HRH1 - histamine receptor h1, CHRNA9 - cholinergic receptor, nicotinic, alpha 9 (neuronal), REEP2 - receptor accessory protein 2, TUB …
GO:0007186	G-protein coupled receptor signaling pathway	9.93e-09	3.51e-05	1.56	14437	504	2587	141	[OPRL1 - opiate receptor-like 1, RGS19 - regulator of g-protein signaling 19, LHB - luteinizing hormone beta polypeptide, GALR2 - galanin receptor 2, OR1F1 - olfactory receptor, family 1, subfamily f, member 1, OR2C1 - olfactory receptor, family 2, subfamily c, member 1, TAS2R10 - taste receptor, type 2, member 10, GPR55 - g protein-coupled receptor 55, CXCL9 - chemokine (c-x-c motif) ligand 9, A…
GO:0043207	response to external biotic stimulus	5.47e-08	0.000155	1.51	14437	544	2587	147	[LILRB2 - leukocyte immunoglobulin-like receptor, subfamily b (with tm and itim domains), member 2, GFI1 - growth factor independent 1 transcription repressor, BNIP3 - bcl2/adenovirus e1b 19kda interacting protein 3, DHX58 - dexh (asp-glu-x-his) box polypeptide 58, BNIP3L - bcl2/adenovirus e1b 19kda interacting protein 3-like, CXCL9 - chemokine (c-x-c motif) ligand 9, CXCL12 - chemokine (c-x-c mo…
GO:0009607	response to biotic stimulus	8.69e-08	0.000204	1.49	14437	566	2587	151	[LILRB2 - leukocyte immunoglobulin-like receptor, subfamily b (with tm and itim domains), member 2, GFI1 - growth factor independent 1 transcription repressor, BNIP3 - bcl2/adenovirus e1b 19kda interacting protein 3, DHX58 - dexh (asp-glu-x-his) box polypeptide 58, BNIP3L - bcl2/adenovirus e1b 19kda interacting protein 3-like, DDIT3 - dna-damage-inducible transcript 3, CXCL9 - chemokine (c-x-c mo…
GO:0098542	defense response to other organism	9.63e-08	0.000194	1.73	14437	267	2587	83	[IFIT2 - interferon-induced protein with tetratricopeptide repeats 2, IFIT1 - interferon-induced protein with tetratricopeptide repeats 1, BNIP3 - bcl2/adenovirus e1b 19kda interacting protein 3, IFIT3 - interferon-induced protein with tetratricopeptide repeats 3, DHX58 - dexh (asp-glu-x-his) box polypeptide 58, BNIP3L - bcl2/adenovirus e1b 19kda interacting protein 3-like, HIST1H2BC - histone cl…
GO:0051707	response to other organism	1.06e-07	0.000187	1.62	14437	366	2587	106	[BNIP3 - bcl2/adenovirus e1b 19kda interacting protein 3, BNIP3L - bcl2/adenovirus e1b 19kda interacting protein 3-like, DHX58 - dexh (asp-glu-x-his) box polypeptide 58, CXCL9 - chemokine (c-x-c motif) ligand 9, CXCL12 - chemokine (c-x-c motif) ligand 12, IL12B - interleukin 12b (natural killer cell stimulatory factor 2, cytotoxic lymphocyte maturation factor 2, p40), IL12A - interleukin 12a (nat…
GO:0006954	inflammatory response	1.12e-07	0.000175	1.62	14437	362	2587	105	[CXCL9 - chemokine (c-x-c motif) ligand 9, BLNK - b-cell linker, ORM1 - orosomucoid 1, ORM2 - orosomucoid 2, AOX1 - aldehyde oxidase 1, HRH1 - histamine receptor h1, IRG1 - immunoresponsive 1 homolog (mouse), IL5 - interleukin 5 (colony-stimulating factor, eosinophil), CCL19 - chemokine (c-c motif) ligand 19, P2RX7 - purinergic receptor p2x, ligand-gated ion channel, 7, CCL15 - chemokine (c-c mot…
GO:0044707	single-multicellular organism process	1.17e-07	0.000165	1.25	14437	1837	2587	411	[NPAS4 - neuronal pas domain protein 4, PHF21A - phd finger protein 21a, SPTBN4 - spectrin, beta, non-erythrocytic 4, LIF - leukemia inhibitory factor, GDNF - glial cell derived neurotrophic factor, ESRP2 - epithelial splicing regulatory protein 2, PML - promyelocytic leukemia, SPARC - secreted protein, acidic, cysteine-rich (osteonectin), TSSK2 - testis-specific serine kinase 2, ASIC1 - acid-sen…
GO:0007267	cell-cell signaling	3.03e-07	0.00039	1.55	14437	422	2587	117	[OPRL1 - opiate receptor-like 1, LHB - luteinizing hormone beta polypeptide, LILRB2 - leukocyte immunoglobulin-like receptor, subfamily b (with tm and itim domains), member 2, GALR2 - galanin receptor 2, CXCL9 - chemokine (c-x-c motif) ligand 9, CORT - cortistatin, CHRNA9 - cholinergic receptor, nicotinic, alpha 9 (neuronal), FGF18 - fibroblast growth factor 18, CNIH2 - cornichon homolog 2 (droso…
GO:0023052	signaling	3.24e-07	0.000381	1.51	14437	472	2587	128	[OPRL1 - opiate receptor-like 1, LHB - luteinizing hormone beta polypeptide, LILRB2 - leukocyte immunoglobulin-like receptor, subfamily b (with tm and itim domains), member 2, GALR2 - galanin receptor 2, CXCL9 - chemokine (c-x-c motif) ligand 9, SPTBN4 - spectrin, beta, non-erythrocytic 4, CORT - cortistatin, CHRNA9 - cholinergic receptor, nicotinic, alpha 9 (neuronal), FGF18 - fibroblast growth …
GO:0044700	single organism signaling	3.92e-07	0.000426	1.51	14437	469	2587	127	[OPRL1 - opiate receptor-like 1, LHB - luteinizing hormone beta polypeptide, LILRB2 - leukocyte immunoglobulin-like receptor, subfamily b (with tm and itim domains), member 2, GALR2 - galanin receptor 2, CXCL9 - chemokine (c-x-c motif) ligand 9, SPTBN4 - spectrin, beta, non-erythrocytic 4, CORT - cortistatin, CHRNA9 - cholinergic receptor, nicotinic, alpha 9 (neuronal), FGF18 - fibroblast growth …
GO:0009617	response to bacterium	4.85e-07	0.000489	1.96	14437	145	2587	51	[HIST1H2BC - histone cluster 1, h2bc, HIST2H2BE - histone cluster 2, h2be, NOS2 - nitric oxide synthase 2, inducible, CAMP - cathelicidin antimicrobial peptide, PRG2 - proteoglycan 2, bone marrow (natural killer cell activator, eosinophil granule major basic protein), PGLYRP4 - peptidoglycan recognition protein 4, ADAMTS5 - adam metallopeptidase with thrombospondin type 1 motif, 5, IL12B - interl…
GO:0042742	defense response to bacterium	5.16e-07	0.000486	2.04	14437	126	2587	46	[MUC5B - mucin 5b, oligomeric mucus/gel-forming, CLEC4D - c-type lectin domain family 4, member d, STAB1 - stabilin 1, CLEC4E - c-type lectin domain family 4, member e, HIST1H2BC - histone cluster 1, h2bc, MYD88 - myeloid differentiation primary response 88, HIST2H2BE - histone cluster 2, h2be, NOS2 - nitric oxide synthase 2, inducible, PRG2 - proteoglycan 2, bone marrow (natural killer cell acti…
GO:0006955	immune response	6.54e-07	0.000578	1.41	14437	682	2587	172	[LILRB2 - leukocyte immunoglobulin-like receptor, subfamily b (with tm and itim domains), member 2, EMP2 - epithelial membrane protein 2, DHX58 - dexh (asp-glu-x-his) box polypeptide 58, CD244 - cd244 molecule, natural killer cell receptor 2b4, CIITA - class ii, major histocompatibility complex, transactivator, PAX5 - paired box 5, CXCL9 - chemokine (c-x-c motif) ligand 9, LIF - leukemia inhibito…
GO:0048856	anatomical structure development	7.72e-07	0.000642	1.19	14437	2439	2587	522	[GFAP - glial fibrillary acidic protein, LHB - luteinizing hormone beta polypeptide, MDGA1 - mam domain containing glycosylphosphatidylinositol anchor 1, SPTA1 - spectrin, alpha, erythrocytic 1 (elliptocytosis 2), GFRA2 - gdnf family receptor alpha 2, LIF - leukemia inhibitory factor, SEPT4 - septin 4, GDNF - glial cell derived neurotrophic factor, PODXL - podocalyxin-like, WFIKKN1 - wap, follist…
GO:0070098	chemokine-mediated signaling pathway	1.3e-06	0.00102	2.55	14437	57	2587	26	[CCR4 - chemokine (c-c motif) receptor 4, CCR5 - chemokine (c-c motif) receptor 5 (gene/pseudogene), CCL3L3 - chemokine (c-c motif) ligand 3-like 3, CCR7 - chemokine (c-c motif) receptor 7, CMKLR1 - chemokine-like receptor 1, CXCL9 - chemokine (c-x-c motif) ligand 9, CXCL12 - chemokine (c-x-c motif) ligand 12, CCR1 - chemokine (c-c motif) receptor 1, CCR3 - chemokine (c-c motif) receptor 3, ACKR4…
GO:0002251	organ or tissue specific immune response	1.76e-06	0.00131	3.82	14437	19	2587	13	[FFAR2 - free fatty acid receptor 2, FFAR3 - free fatty acid receptor 3, HIST1H2BC - histone cluster 1, h2bc, HIST2H2BE - histone cluster 2, h2be, NOS2 - nitric oxide synthase 2, inducible, CAMP - cathelicidin antimicrobial peptide, HIST1H2BK - histone cluster 1, h2bk, IFNLR1 - interferon, lambda receptor 1, HIST1H2BJ - histone cluster 1, h2bj, HIST1H2BE - histone cluster 1, h2be, HIST1H2BF - his…
GO:0032502	developmental process	2.15e-06	0.00152	1.14	14437	3620	2587	742	[GFAP - glial fibrillary acidic protein, MDGA1 - mam domain containing glycosylphosphatidylinositol anchor 1, LHB - luteinizing hormone beta polypeptide, SPTA1 - spectrin, alpha, erythrocytic 1 (elliptocytosis 2), GFI1 - growth factor independent 1 transcription repressor, NPAS4 - neuronal pas domain protein 4, GFRA2 - gdnf family receptor alpha 2, KIF20B - kinesin family member 20b, TNFRSF12A - …
- retinoic acid receptor, beta, PDGFD - platelet derived growth factor d, TET1 - tet methylcytosine dioxygenase 1, BCAR3 - breast cancer anti-estrogen resistance 3, SDK2 - sidekick cell adhesion molecule 2, CLU - clusterin, NFIA - nuclear factor i/a, FOXD3 - forkhead box d3, RAI1 - retinoic acid induced 1, NPHP3 - nephronophthisis 3 (adolescent), SCUBE1 - signal peptide, cub domain, egf-like 1, T…
GO:0007154	cell communication	2.27e-06	0.00153	1.42	14437	586	2587	149	[OPRL1 - opiate receptor-like 1, LHB - luteinizing hormone beta polypeptide, LILRB2 - leukocyte immunoglobulin-like receptor, subfamily b (with tm and itim domains), member 2, GALR2 - galanin receptor 2, CXCL9 - chemokine (c-x-c motif) ligand 9, CORT - cortistatin, PMAIP1 - phorbol-12-myristate-13-acetate-induced protein 1, CHRNA9 - cholinergic receptor, nicotinic, alpha 9 (neuronal), FGF18 - fib…
GO:0002385	mucosal immune response	2.71e-06	0.00174	3.94	14437	17	2587	12	[FFAR2 - free fatty acid receptor 2, HIST1H2BC - histone cluster 1, h2bc, FFAR3 - free fatty acid receptor 3, IFNLR1 - interferon, lambda receptor 1, HIST2H2BE - histone cluster 2, h2be, NOS2 - nitric oxide synthase 2, inducible, HIST1H2BJ - histone cluster 1, h2bj, HIST1H2BE - histone cluster 1, h2be, HIST1H2BF - histone cluster 1, h2bf, CAMP - cathelicidin antimicrobial peptide, HIST1H2BK - his…
GO:0009605	response to external stimulus	2.94e-06	0.00181	1.32	14437	954	2587	225	[LILRB2 - leukocyte immunoglobulin-like receptor, subfamily b (with tm and itim domains), member 2, BNIP3 - bcl2/adenovirus e1b 19kda interacting protein 3, GFI1 - growth factor independent 1 transcription repressor, BNIP3L - bcl2/adenovirus e1b 19kda interacting protein 3-like, DHX58 - dexh (asp-glu-x-his) box polypeptide 58, TRPC3 - transient receptor potential cation channel, subfamily c, memb…
GO:0006334	nucleosome assembly	3.88e-06	0.00228	2.03	14437	107	2587	39	[HIST1H3D - histone cluster 1, h3d, HIST1H2BD - histone cluster 1, h2bd, CENPA - centromere protein a, H2AFX - h2a histone family, member x, HIST1H4I - histone cluster 1, h4i, HIST1H2BC - histone cluster 1, h2bc, ITGB3BP - integrin beta 3 binding protein (beta3-endonexin), HIST1H2BO - histone cluster 1, h2bo, HIST2H2BE - histone cluster 2, h2be, CENPM - centromere protein m, HIST1H1B - histone cl…
GO:0008283	cell proliferation	5.3e-06	0.003	1.42	14437	552	2587	140	[FAM83D - family with sequence similarity 83, member d, CDC25A - cell division cycle 25a, CDK1 - cyclin-dependent kinase 1, MIA - melanoma inhibitory activity, IL15RA - interleukin 15 receptor, alpha, BRCA2 - breast cancer 2, early onset, TCF19 - transcription factor 19, CDC25C - cell division cycle 25c, EML1 - echinoderm microtubule associated protein like 1, ACE - angiotensin i converting enzym…
GO:0051239	regulation of multicellular organismal process	6.41e-06	0.00348	1.19	14437	2126	2587	454	[GFAP - glial fibrillary acidic protein, GFI1 - growth factor independent 1 transcription repressor, KIF20B - kinesin family member 20b, TNFRSF12A - tumor necrosis factor receptor superfamily, member 12a, SPTBN4 - spectrin, beta, non-erythrocytic 4, LIF - leukemia inhibitory factor, GDNF - glial cell derived neurotrophic factor, PLXNB3 - plexin b3, PROK1 - prokineticin 1, PML - promyelocytic leuk…
GO:0055074	calcium ion homeostasis	6.75e-06	0.00353	1.61	14437	267	2587	77	[OPRL1 - opiate receptor-like 1, TRPV4 - transient receptor potential cation channel, subfamily v, member 4, BNIP3 - bcl2/adenovirus e1b 19kda interacting protein 3, GALR2 - galanin receptor 2, CHRNA7 - cholinergic receptor, nicotinic, alpha 7 (neuronal), ATP2B2 - atpase, ca++ transporting, plasma membrane 2, TRIM24 - tripartite motif containing 24, GPR55 - g protein-coupled receptor 55, DDIT3 - …
GO:0031109	microtubule polymerization or depolymerization	6.79e-06	0.00342	3.72	14437	18	2587	12	[KIF24 - kinesin family member 24, TRPV4 - transient receptor potential cation channel, subfamily v, member 4, CCSAP - centriole, cilia and spindle-associated protein, STMN1 - stathmin 1, TPPP3 - tubulin polymerization-promoting protein family member 3, FGF13 - fibroblast growth factor 13, HDGFRP3 - hepatoma-derived growth factor, related protein 3, KIF18B - kinesin family member 18b, KIF2C - kin…
GO:0006873	cellular ion homeostasis	7.27e-06	0.00354	1.48	14437	411	2587	109	[OPRL1 - opiate receptor-like 1, BNIP3 - bcl2/adenovirus e1b 19kda interacting protein 3, GALR2 - galanin receptor 2, GPR55 - g protein-coupled receptor 55, DDIT3 - dna-damage-inducible transcript 3, CXCL12 - chemokine (c-x-c motif) ligand 12, SLC34A3 - solute carrier family 34 (type ii sodium/phosphate contransporter), member 3, HEPH - hephaestin, JPH3 - junctophilin 3, SLC9C2 - solute carrier f…
GO:0051480	regulation of cytosolic calcium ion concentration	7.76e-06	0.00365	1.76	14437	174	2587	55	[OPRL1 - opiate receptor-like 1, TRPV4 - transient receptor potential cation channel, subfamily v, member 4, GALR2 - galanin receptor 2, ATP2B2 - atpase, ca++ transporting, plasma membrane 2, GPR55 - g protein-coupled receptor 55, DDIT3 - dna-damage-inducible transcript 3, ATP1A2 - atpase, na+/k+ transporting, alpha 2 polypeptide, JPH3 - junctophilin 3, TRPC1 - transient receptor potential cation…
GO:0050877	neurological system process	1.05e-05	0.00476	1.42	14437	507	2587	129	[OPRL1 - opiate receptor-like 1, NPAS4 - neuronal pas domain protein 4, GALR2 - galanin receptor 2, PAX6 - paired box 6, MIP - major intrinsic protein of lens fiber, TCF15 - transcription factor 15 (basic helix-loop-helix), CDH3 - cadherin 3, type 1, p-cadherin (placental), SPTBN4 - spectrin, beta, non-erythrocytic 4, CNTNAP1 - contactin associated protein 1, IL12B - interleukin 12b (natural kill…
GO:0006874	cellular calcium ion homeostasis	1.07e-05	0.00474	1.61	14437	257	2587	74	[OPRL1 - opiate receptor-like 1, TRPV4 - transient receptor potential cation channel, subfamily v, member 4, BNIP3 - bcl2/adenovirus e1b 19kda interacting protein 3, GALR2 - galanin receptor 2, CHRNA7 - cholinergic receptor, nicotinic, alpha 7 (neuronal), ATP2B2 - atpase, ca++ transporting, plasma membrane 2, GPR55 - g protein-coupled receptor 55, DDIT3 - dna-damage-inducible transcript 3, XK - x…
GO:0030003	cellular cation homeostasis	1.27e-05	0.00543	1.47	14437	402	2587	106	[OPRL1 - opiate receptor-like 1, BNIP3 - bcl2/adenovirus e1b 19kda interacting protein 3, GALR2 - galanin receptor 2, GPR55 - g protein-coupled receptor 55, DDIT3 - dna-damage-inducible transcript 3, CXCL12 - chemokine (c-x-c motif) ligand 12, HEPH - hephaestin, JPH3 - junctophilin 3, SLC9C2 - solute carrier family 9, member c2 (putative), PML - promyelocytic leukemia, CHRNA9 - cholinergic recept…
GO:0072507	divalent inorganic cation homeostasis	1.27e-05	0.00528	1.56	14437	289	2587	81	[OPRL1 - opiate receptor-like 1, TRPV4 - transient receptor potential cation channel, subfamily v, member 4, BNIP3 - bcl2/adenovirus e1b 19kda interacting protein 3, GALR2 - galanin receptor 2, CHRNA7 - cholinergic receptor, nicotinic, alpha 7 (neuronal), ATP2B2 - atpase, ca++ transporting, plasma membrane 2, TRIM24 - tripartite motif containing 24, GPR55 - g protein-coupled receptor 55, DDIT3 - …
GO:0007204	positive regulation of cytosolic calcium ion concentration	1.32e-05	0.00532	1.8	14437	152	2587	49	[OPRL1 - opiate receptor-like 1, TRPV4 - transient receptor potential cation channel, subfamily v, member 4, GALR2 - galanin receptor 2, GPR55 - g protein-coupled receptor 55, DDIT3 - dna-damage-inducible transcript 3, JPH3 - junctophilin 3, CHRNA9 - cholinergic receptor, nicotinic, alpha 9 (neuronal), XCR1 - chemokine (c motif) receptor 1, CCL19 - chemokine (c-c motif) ligand 19, P2RX7 - puriner…
GO:0072503	cellular divalent inorganic cation homeostasis	1.4e-05	0.0055	1.58	14437	272	2587	77	[OPRL1 - opiate receptor-like 1, TRPV4 - transient receptor potential cation channel, subfamily v, member 4, BNIP3 - bcl2/adenovirus e1b 19kda interacting protein 3, GALR2 - galanin receptor 2, CHRNA7 - cholinergic receptor, nicotinic, alpha 7 (neuronal), ATP2B2 - atpase, ca++ transporting, plasma membrane 2, GPR55 - g protein-coupled receptor 55, DDIT3 - dna-damage-inducible transcript 3, XK - x…
GO:0071805	potassium ion transmembrane transport	1.99e-05	0.00758	1.99	14437	98	2587	35	[KCNH4 - potassium voltage-gated channel, subfamily h (eag-related), member 4, FXYD2 - fxyd domain containing ion transport regulator 2, KCNG3 - potassium voltage-gated channel, subfamily g, member 3, CNGA4 - cyclic nucleotide gated channel alpha 4, KCNA3 - potassium voltage-gated channel, shaker-related subfamily, member 3, KCNG2 - potassium voltage-gated channel, subfamily g, member 2, ATP1A2 -…
GO:0071804	cellular potassium ion transport	1.99e-05	0.00738	1.99	14437	98	2587	35	[KCNH4 - potassium voltage-gated channel, subfamily h (eag-related), member 4, FXYD2 - fxyd domain containing ion transport regulator 2, KCNG3 - potassium voltage-gated channel, subfamily g, member 3, CNGA4 - cyclic nucleotide gated channel alpha 4, KCNA3 - potassium voltage-gated channel, shaker-related subfamily, member 3, KCNG2 - potassium voltage-gated channel, subfamily g, member 2, ATP1A2 -…
GO:0044057	regulation of system process	2.09e-05	0.00755	1.48	14437	365	2587	97	[OPRL1 - opiate receptor-like 1, EMP2 - epithelial membrane protein 2, SPTBN4 - spectrin, beta, non-erythrocytic 4, TRPC3 - transient receptor potential cation channel, subfamily c, member 3, ACE - angiotensin i converting enzyme, HRH1 - histamine receptor h1, TRPC1 - transient receptor potential cation channel, subfamily c, member 1, CPS1 - carbamoyl-phosphate synthase 1, mitochondrial, GUCY1A3 …
GO:0042573	retinoic acid metabolic process	2.45e-05	0.00866	4.19	14437	12	2587	9	[ALDH1A3 - aldehyde dehydrogenase 1 family, member a3, BCO2 - beta-carotene oxygenase 2, ALDH1A2 - aldehyde dehydrogenase 1 family, member a2, CYP1A1 - cytochrome p450, family 1, subfamily a, polypeptide 1, DHRS9 - dehydrogenase/reductase (sdr family) member 9, CRABP2 - cellular retinoic acid binding protein 2, CRABP1 - cellular retinoic acid binding protein 1, CYP26B1 - cytochrome p450, family 2…
GO:0007187	G-protein coupled receptor signaling pathway, coupled to cyclic nucleotide second messenger	2.66e-05	0.00917	1.93	14437	107	2587	37	[GRK5 - g protein-coupled receptor kinase 5, OPRL1 - opiate receptor-like 1, GALR2 - galanin receptor 2, FFAR3 - free fatty acid receptor 3, SLC9A3R1 - solute carrier family 9, subfamily a (nhe3, cation proton antiporter 3), member 3 regulator 1, ADRA2C - adrenoceptor alpha 2c, GALR1 - galanin receptor 1, CHRM3 - cholinergic receptor, muscarinic 3, CCR1 - chemokine (c-c motif) receptor 1, CHRM5 -…
GO:0042127	regulation of cell proliferation	3.22e-05	0.0108	1.24	14437	1212	2587	270	[GFAP - glial fibrillary acidic protein, EMP2 - epithelial membrane protein 2, LILRB2 - leukocyte immunoglobulin-like receptor, subfamily b (with tm and itim domains), member 2, SPTA1 - spectrin, alpha, erythrocytic 1 (elliptocytosis 2), TRIM24 - tripartite motif containing 24, KIF20B - kinesin family member 20b, BRCA2 - breast cancer 2, early onset, BRCA1 - breast cancer 1, early onset, LIF - le…
GO:0055082	cellular chemical homeostasis	3.54e-05	0.0116	1.41	14437	472	2587	119	[OPRL1 - opiate receptor-like 1, BNIP3 - bcl2/adenovirus e1b 19kda interacting protein 3, GALR2 - galanin receptor 2, GPR55 - g protein-coupled receptor 55, DDIT3 - dna-damage-inducible transcript 3, MIP - major intrinsic protein of lens fiber, CXCL12 - chemokine (c-x-c motif) ligand 12, SLC34A3 - solute carrier family 34 (type ii sodium/phosphate contransporter), member 3, HEPH - hephaestin, JPH…
GO:0008284	positive regulation of cell proliferation	3.7e-05	0.0119	1.34	14437	654	2587	157	[CDC6 - cell division cycle 6, GFAP - glial fibrillary acidic protein, EMP2 - epithelial membrane protein 2, LILRB2 - leukocyte immunoglobulin-like receptor, subfamily b (with tm and itim domains), member 2, SPTA1 - spectrin, alpha, erythrocytic 1 (elliptocytosis 2), CDC20 - cell division cycle 20, BIRC5 - baculoviral iap repeat containing 5, CDK1 - cyclin-dependent kinase 1, CD244 - cd244 molecu…
GO:0007586	digestion	3.71e-05	0.0116	2.89	14437	29	2587	15	[GALR2 - galanin receptor 2, CTSE - cathepsin e, AMY2B - amylase, alpha 2b (pancreatic), MEP1A - meprin a, alpha (paba peptide hydrolase), PYY - peptide yy, AKR1C2 - aldo-keto reductase family 1, member c2, GALR1 - galanin receptor 1, LIPG - lipase, endothelial, ARX - aristaless related homeobox, PPARGC1A - peroxisome proliferator-activated receptor gamma, coactivator 1 alpha, SSTR2 - somatostati…
GO:0032103	positive regulation of response to external stimulus	3.79e-05	0.0116	1.62	14437	213	2587	62	[TRPV4 - transient receptor potential cation channel, subfamily v, member 4, DHX58 - dexh (asp-glu-x-his) box polypeptide 58, CCL3L3 - chemokine (c-c motif) ligand 3-like 3, F12 - coagulation factor xii (hageman factor), CXCL9 - chemokine (c-x-c motif) ligand 9, FABP4 - fatty acid binding protein 4, adipocyte, CXCL12 - chemokine (c-x-c motif) ligand 12, IL12B - interleukin 12b (natural killer cel…
GO:0007019	microtubule depolymerization	3.98e-05	0.012	4.88	14437	8	2587	7	[CCSAP - centriole, cilia and spindle-associated protein, KIF24 - kinesin family member 24, STMN1 - stathmin 1, KIF18B - kinesin family member 18b, KIF18A - kinesin family member 18a, KIF2C - kinesin family member 2c, NCKAP5L - nck-associated protein 5-like]
GO:0006875	cellular metal ion homeostasis	4.04e-05	0.0119	1.49	14437	334	2587	89	[OPRL1 - opiate receptor-like 1, TRPV4 - transient receptor potential cation channel, subfamily v, member 4, BNIP3 - bcl2/adenovirus e1b 19kda interacting protein 3, GALR2 - galanin receptor 2, CHRNA7 - cholinergic receptor, nicotinic, alpha 7 (neuronal), ATP2B2 - atpase, ca++ transporting, plasma membrane 2, GPR55 - g protein-coupled receptor 55, DDIT3 - dna-damage-inducible transcript 3, XK - x…
GO:0050729	positive regulation of inflammatory response	4.05e-05	0.0117	1.96	14437	97	2587	34	[TRPV4 - transient receptor potential cation channel, subfamily v, member 4, FFAR2 - free fatty acid receptor 2, CCR7 - chemokine (c-c motif) receptor 7, CCL3L3 - chemokine (c-c motif) ligand 3-like 3, FFAR3 - free fatty acid receptor 3, F12 - coagulation factor xii (hageman factor), FABP4 - fatty acid binding protein 4, adipocyte, ITGA2 - integrin, alpha 2 (cd49b, alpha 2 subunit of vla-2 recept…
GO:0030595	leukocyte chemotaxis	4.19e-05	0.0118	1.91	14437	105	2587	36	[CCR5 - chemokine (c-c motif) receptor 5 (gene/pseudogene), FFAR2 - free fatty acid receptor 2, ITGA9 - integrin, alpha 9, CCR7 - chemokine (c-c motif) receptor 7, CCL3L3 - chemokine (c-c motif) ligand 3-like 3, SCG2 - secretogranin ii, CCR1 - chemokine (c-c motif) receptor 1, PDGFB - platelet-derived growth factor beta polypeptide, HRH1 - histamine receptor h1, PPBP - pro-platelet basic protein …
GO:0034080	CENP-A containing nucleosome assembly	4.55e-05	0.0126	2.58	14437	39	2587	18	[CENPA - centromere protein a, HIST1H4I - histone cluster 1, h4i, ITGB3BP - integrin beta 3 binding protein (beta3-endonexin), CENPM - centromere protein m, OIP5 - opa interacting protein 5, HIST1H4K - histone cluster 1, h4k, CENPK - centromere protein k, CASC5 - cancer susceptibility candidate 5, HIST1H4E - histone cluster 1, h4e, HIST1H4H - histone cluster 1, h4h, HIST1H4C - histone cluster 1, …
GO:0007165	signal transduction	4.67e-05	0.0127	1.13	14437	3454	2587	697	[LHB - luteinizing hormone beta polypeptide, SPTA1 - spectrin, alpha, erythrocytic 1 (elliptocytosis 2), GFRA2 - gdnf family receptor alpha 2, TNFRSF12A - tumor necrosis factor receptor superfamily, member 12a, SPTBN4 - spectrin, beta, non-erythrocytic 4, AKAP12 - a kinase (prka) anchor protein 12, LIF - leukemia inhibitory factor, LIFR - leukemia inhibitory factor receptor alpha, GDNF - glial ce…
orming growth factor, beta 2, TGFB3 - transforming growth factor, beta 3, TRABD2A - trab domain containing 2a, RASGRF1 - ras protein-specific guanine nucleotide-releasing factor 1, HCAR2 - hydroxycarboxylic acid receptor 2, IGFBP5 - insulin-like growth factor binding protein 5, NEURL1B - neuralized homolog 1b (drosophila), DEPDC5 - dep domain containing 5, MYO1G - myosin ig, TGFBR3 - transforming…
GO:0040011	locomotion	5.79e-05	0.0154	1.3	14437	762	2587	178	[MDGA1 - mam domain containing glycosylphosphatidylinositol anchor 1, EMP2 - epithelial membrane protein 2, FAM83D - family with sequence similarity 83, member d, CDK1 - cyclin-dependent kinase 1, CD244 - cd244 molecule, natural killer cell receptor 2b4, PAX6 - paired box 6, MITF - microphthalmia-associated transcription factor, SEMA4C - sema domain, immunoglobulin domain (ig), transmembrane doma…
GO:0031055	chromatin remodeling at centromere	5.93e-05	0.0155	2.47	14437	43	2587	19	[CENPA - centromere protein a, HIST1H4I - histone cluster 1, h4i, ITGB3BP - integrin beta 3 binding protein (beta3-endonexin), CENPM - centromere protein m, OIP5 - opa interacting protein 5, HIST1H4K - histone cluster 1, h4k, CENPK - centromere protein k, CASC5 - cancer susceptibility candidate 5, HELLS - helicase, lymphoid-specific, HIST1H4E - histone cluster 1, h4e, HIST1H4H - histone cluster 1…
GO:0002227	innate immune response in mucosa	6.69e-05	0.0172	3.86	14437	13	2587	9	[HIST1H2BC - histone cluster 1, h2bc, HIST2H2BE - histone cluster 2, h2be, NOS2 - nitric oxide synthase 2, inducible, HIST1H2BJ - histone cluster 1, h2bj, HIST1H2BE - histone cluster 1, h2be, HIST1H2BF - histone cluster 1, h2bf, CAMP - cathelicidin antimicrobial peptide, HIST1H2BK - histone cluster 1, h2bk, HIST1H2BG - histone cluster 1, h2bg]
GO:0048557	embryonic digestive tract morphogenesis	6.69e-05	0.0169	3.86	14437	13	2587	9	[TCF7 - transcription factor 7 (t-cell specific, hmg-box), ID2 - inhibitor of dna binding 2, dominant negative helix-loop-helix protein, GLI3 - gli family zinc finger 3, PITX2 - paired-like homeodomain 2, SHH - sonic hedgehog, FGF10 - fibroblast growth factor 10, SHOX2 - short stature homeobox 2, FOXF1 - forkhead box f1, SIX2 - six homeobox 2]
GO:0044699	single-organism process	7.2e-05	0.0178	1.06	14437	8350	2587	1583	[SEPT4 - septin 4, PODXL - podocalyxin-like, SH2D1B - sh2 domain containing 1b, PLXNB3 - plexin b3, WFIKKN1 - wap, follistatin/kazal, immunoglobulin, kunitz and netrin domain containing 1, PMAIP1 - phorbol-12-myristate-13-acetate-induced protein 1, PML - promyelocytic leukemia, CHRNA9 - cholinergic receptor, nicotinic, alpha 9 (neuronal), LURAP1 - leucine rich adaptor protein 1, HRASLS5 - hras-li…
member c2 (putative), TRO - trophinin, TRPC1 - transient receptor potential cation channel, subfamily c, member 1, C8orf4 - chromosome 8 open reading frame 4, TUB - tubby bipartite transcription factor, TMEM88 - transmembrane protein 88, DAPL1 - death associated protein-like 1, TPX2 - tpx2, microtubule-associated, AKR7A3 - aldo-keto reductase family 7, member a3 (aflatoxin aldehyde reductase), TU…
, FAM57B - family with sequence similarity 57, member b, LRP4 - low density lipoprotein receptor-related protein 4, LY9 - lymphocyte antigen 9, SLC4A9 - solute carrier family 4, sodium bicarbonate cotransporter, member 9, PKD2L1 - polycystic kidney disease 2-like 1, TPPP3 - tubulin polymerization-promoting protein family member 3, LTBP3 - latent transforming growth factor beta binding protein 3, …
GO:0060326	cell chemotaxis	7.92e-05	0.0193	1.72	14437	149	2587	46	[CCR5 - chemokine (c-c motif) receptor 5 (gene/pseudogene), FFAR2 - free fatty acid receptor 2, ITGA9 - integrin, alpha 9, CCR7 - chemokine (c-c motif) receptor 7, CCL3L3 - chemokine (c-c motif) ligand 3-like 3, SCG2 - secretogranin ii, CXCL9 - chemokine (c-x-c motif) ligand 9, CXCL12 - chemokine (c-x-c motif) ligand 12, CCR1 - chemokine (c-c motif) receptor 1, PDGFB - platelet-derived growth fac…
GO:0044767	single-organism developmental process	8e-05	0.0192	1.13	14437	3286	2587	663	[GFAP - glial fibrillary acidic protein, MDGA1 - mam domain containing glycosylphosphatidylinositol anchor 1, LHB - luteinizing hormone beta polypeptide, SPTA1 - spectrin, alpha, erythrocytic 1 (elliptocytosis 2), GFI1 - growth factor independent 1 transcription repressor, NPAS4 - neuronal pas domain protein 4, KIF20B - kinesin family member 20b, TNFRSF12A - tumor necrosis factor receptor superfa…
GO:0050801	ion homeostasis	8.48e-05	0.02	1.38	14437	481	2587	119	[OPRL1 - opiate receptor-like 1, BNIP3 - bcl2/adenovirus e1b 19kda interacting protein 3, GALR2 - galanin receptor 2, PQLC2 - pq loop repeat containing 2, TRIM24 - tripartite motif containing 24, GPR55 - g protein-coupled receptor 55, DDIT3 - dna-damage-inducible transcript 3, CXCL12 - chemokine (c-x-c motif) ligand 12, SLC34A3 - solute carrier family 34 (type ii sodium/phosphate contransporter),…
GO:0072676	lymphocyte migration	8.7e-05	0.0201	2.41	14437	44	2587	19	[CCL19 - chemokine (c-c motif) ligand 19, CCR7 - chemokine (c-c motif) receptor 7, CCL3L3 - chemokine (c-c motif) ligand 3-like 3, GATA3 - gata binding protein 3, CCL15 - chemokine (c-c motif) ligand 15, CXCR3 - chemokine (c-x-c motif) receptor 3, ARTN - artemin, CCL8 - chemokine (c-c motif) ligand 8, CXCL10 - chemokine (c-x-c motif) ligand 10, CCL2 - chemokine (c-c motif) ligand 2, CCL1 - chemok…
GO:0060402	calcium ion transport into cytosol	8.7e-05	0.0198	2.41	14437	44	2587	19	[RYR3 - ryanodine receptor 3, CCR5 - chemokine (c-c motif) receptor 5 (gene/pseudogene), CCL19 - chemokine (c-c motif) ligand 19, CCR7 - chemokine (c-c motif) receptor 7, P2RX7 - purinergic receptor p2x, ligand-gated ion channel, 7, TRPM1 - transient receptor potential cation channel, subfamily m, member 1, DDIT3 - dna-damage-inducible transcript 3, CACNB3 - calcium channel, voltage-dependent, be…
GO:0050900	leukocyte migration	0.0001	0.0225	1.57	14437	224	2587	63	[CCL3L3 - chemokine (c-c motif) ligand 3-like 3, CD244 - cd244 molecule, natural killer cell receptor 2b4, MITF - microphthalmia-associated transcription factor, PODXL - podocalyxin-like, ATP1B1 - atpase, na+/k+ transporting, beta 1 polypeptide, TBX21 - t-box 21, HRH1 - histamine receptor h1, MERTK - c-mer proto-oncogene tyrosine kinase, SELPLG - selectin p ligand, SELL - selectin l, MMP1 - matri…
GO:0006813	potassium ion transport	0.000101	0.0224	1.84	14437	109	2587	36	[KCNH4 - potassium voltage-gated channel, subfamily h (eag-related), member 4, FXYD2 - fxyd domain containing ion transport regulator 2, KCNG3 - potassium voltage-gated channel, subfamily g, member 3, CNGA4 - cyclic nucleotide gated channel alpha 4, KCNA3 - potassium voltage-gated channel, shaker-related subfamily, member 3, KCNG2 - potassium voltage-gated channel, subfamily g, member 2, ATP1A2 -…
GO:0060602	branch elongation of an epithelium	0.000104	0.0225	4.06	14437	11	2587	8	[ESR1 - estrogen receptor 1, YAP1 - yes-associated protein 1, SHH - sonic hedgehog, FGF10 - fibroblast growth factor 10, SPRY1 - sprouty homolog 1, antagonist of fgf signaling (drosophila), TNC - tenascin c, HOXD13 - homeobox d13, BMP4 - bone morphogenetic protein 4]
GO:0043269	regulation of ion transport	0.000104	0.0222	1.4	14437	431	2587	108	[OPRL1 - opiate receptor-like 1, LILRB2 - leukocyte immunoglobulin-like receptor, subfamily b (with tm and itim domains), member 2, GALR2 - galanin receptor 2, PLA2R1 - phospholipase a2 receptor 1, 180kda, CXCL9 - chemokine (c-x-c motif) ligand 9, SPTBN4 - spectrin, beta, non-erythrocytic 4, CXCL12 - chemokine (c-x-c motif) ligand 12, GDNF - glial cell derived neurotrophic factor, PRSS8 - proteas…
GO:0007389	pattern specification process	0.000111	0.0234	1.52	14437	265	2587	72	[RGS19 - regulator of g-protein signaling 19, TTC21B - tetratricopeptide repeat domain 21b, DCHS1 - dachsous 1 (drosophila), PAX6 - paired box 6, TCF15 - transcription factor 15 (basic helix-loop-helix), NEK8 - nima-related kinase 8, MID1 - midline 1 (opitz/bbb syndrome), PBX1 - pre-b-cell leukemia homeobox 1, MNS1 - meiosis-specific nuclear structural 1, SOSTDC1 - sclerostin domain containing 1,…
GO:0030198	extracellular matrix organization	0.000115	0.024	1.56	14437	225	2587	63	[GFAP - glial fibrillary acidic protein, ITGA10 - integrin, alpha 10, ADAMTS5 - adam metallopeptidase with thrombospondin type 1 motif, 5, CCDC80 - coiled-coil domain containing 80, COL14A1 - collagen, type xiv, alpha 1, SPARC - secreted protein, acidic, cysteine-rich (osteonectin), MMP1 - matrix metallopeptidase 1 (interstitial collagenase), MMP7 - matrix metallopeptidase 7 (matrilysin, uterine)…
GO:0098771	inorganic ion homeostasis	0.000121	0.0247	1.38	14437	461	2587	114	[OPRL1 - opiate receptor-like 1, BNIP3 - bcl2/adenovirus e1b 19kda interacting protein 3, GALR2 - galanin receptor 2, TRIM24 - tripartite motif containing 24, GPR55 - g protein-coupled receptor 55, DDIT3 - dna-damage-inducible transcript 3, CXCL12 - chemokine (c-x-c motif) ligand 12, SLC34A3 - solute carrier family 34 (type ii sodium/phosphate contransporter), member 3, HEPH - hephaestin, JPH3 - …
GO:0043062	extracellular structure organization	0.000132	0.0267	1.56	14437	226	2587	63	[GFAP - glial fibrillary acidic protein, ITGA10 - integrin, alpha 10, ADAMTS5 - adam metallopeptidase with thrombospondin type 1 motif, 5, CCDC80 - coiled-coil domain containing 80, COL14A1 - collagen, type xiv, alpha 1, SPARC - secreted protein, acidic, cysteine-rich (osteonectin), MMP1 - matrix metallopeptidase 1 (interstitial collagenase), MMP7 - matrix metallopeptidase 7 (matrilysin, uterine)…
GO:0034728	nucleosome organization	0.000135	0.0269	1.75	14437	131	2587	41	[HIST1H3D - histone cluster 1, h3d, HIST1H2BD - histone cluster 1, h2bd, CENPA - centromere protein a, H2AFX - h2a histone family, member x, HIST1H4I - histone cluster 1, h4i, HIST1H2BC - histone cluster 1, h2bc, HIST1H2BO - histone cluster 1, h2bo, ITGB3BP - integrin beta 3 binding protein (beta3-endonexin), HIST2H2BE - histone cluster 2, h2be, CENPM - centromere protein m, HIST1H1B - histone cl…
GO:0019221	cytokine-mediated signaling pathway	0.000137	0.0269	1.42	14437	382	2587	97	[CIITA - class ii, major histocompatibility complex, transactivator, IL15RA - interleukin 15 receptor, alpha, TNFRSF12A - tumor necrosis factor receptor superfamily, member 12a, CXCL9 - chemokine (c-x-c motif) ligand 9, MID1 - midline 1 (opitz/bbb syndrome), CXCL12 - chemokine (c-x-c motif) ligand 12, LIFR - leukemia inhibitory factor receptor alpha, IL12B - interleukin 12b (natural killer cell s…
GO:0042330	taxis	0.000153	0.0297	1.52	14437	254	2587	69	[CCL3L3 - chemokine (c-c motif) ligand 3-like 3, SEMA4C - sema domain, immunoglobulin domain (ig), transmembrane domain (tm) and short cytoplasmic domain, (semaphorin) 4c, CXCL9 - chemokine (c-x-c motif) ligand 9, CXCL12 - chemokine (c-x-c motif) ligand 12, PLXNB3 - plexin b3, ACKR4 - atypical chemokine receptor 4, HRH1 - histamine receptor h1, ID2 - inhibitor of dna binding 2, dominant negative …
GO:0002548	monocyte chemotaxis	0.000157	0.03	2.62	14437	32	2587	15	[S100A12 - s100 calcium binding protein a12, CCL19 - chemokine (c-c motif) ligand 19, CCL3L3 - chemokine (c-c motif) ligand 3-like 3, CCL15 - chemokine (c-c motif) ligand 15, CCL8 - chemokine (c-c motif) ligand 8, CCL7 - chemokine (c-c motif) ligand 7, CCL2 - chemokine (c-c motif) ligand 2, CCL1 - chemokine (c-c motif) ligand 1, CCL3L1 - chemokine (c-c motif) ligand 3-like 1, PDGFB - platelet-der…
GO:0003401	axis elongation	0.000157	0.0297	3.59	14437	14	2587	9	[ESR1 - estrogen receptor 1, YAP1 - yes-associated protein 1, SHH - sonic hedgehog, FGF10 - fibroblast growth factor 10, SPRY1 - sprouty homolog 1, antagonist of fgf signaling (drosophila), TNC - tenascin c, HOXD13 - homeobox d13, BMP4 - bone morphogenetic protein 4, PTK7 - protein tyrosine kinase 7]
GO:0044364	disruption of cells of other organism	0.000157	0.0293	3.59	14437	14	2587	9	[S100A12 - s100 calcium binding protein a12, HAMP - hepcidin antimicrobial peptide, C9 - complement component 9, CTSG - cathepsin g, MBL2 - mannose-binding lectin (protein c) 2, soluble, GNLY - granulysin, ALB - albumin, CAMP - cathelicidin antimicrobial peptide, APOL1 - apolipoprotein l, 1]
GO:0031640	killing of cells of other organism	0.000157	0.0289	3.59	14437	14	2587	9	[S100A12 - s100 calcium binding protein a12, HAMP - hepcidin antimicrobial peptide, C9 - complement component 9, CTSG - cathepsin g, MBL2 - mannose-binding lectin (protein c) 2, soluble, GNLY - granulysin, ALB - albumin, CAMP - cathelicidin antimicrobial peptide, APOL1 - apolipoprotein l, 1]
GO:0055080	cation homeostasis	0.000164	0.0297	1.38	14437	450	2587	111	[OPRL1 - opiate receptor-like 1, BNIP3 - bcl2/adenovirus e1b 19kda interacting protein 3, GALR2 - galanin receptor 2, TRIM24 - tripartite motif containing 24, GPR55 - g protein-coupled receptor 55, DDIT3 - dna-damage-inducible transcript 3, CXCL12 - chemokine (c-x-c motif) ligand 12, HEPH - hephaestin, JPH3 - junctophilin 3, SLC9C2 - solute carrier family 9, member c2 (putative), PML - promyelocy…
GO:0016477	cell migration	0.000168	0.03	1.31	14437	624	2587	147	[MDGA1 - mam domain containing glycosylphosphatidylinositol anchor 1, EMP2 - epithelial membrane protein 2, FAM83D - family with sequence similarity 83, member d, CDK1 - cyclin-dependent kinase 1, CD244 - cd244 molecule, natural killer cell receptor 2b4, PAX6 - paired box 6, MITF - microphthalmia-associated transcription factor, SEMA4C - sema domain, immunoglobulin domain (ig), transmembrane doma…
GO:0009887	animal organ morphogenesis	0.00017	0.03	1.43	14437	356	2587	91	[SLC6A4 - solute carrier family 6 (neurotransmitter transporter), member 4, PAX6 - paired box 6, PAX5 - paired box 5, TCF15 - transcription factor 15 (basic helix-loop-helix), NEK8 - nima-related kinase 8, LIF - leukemia inhibitory factor, ETV7 - ets variant 7, TLE3 - transducin-like enhancer of split 3 (e(sp1) homolog, drosophila), GCNT1 - glucosaminyl (n-acetyl) transferase 1, core 2, STRA6 - s…
GO:0009954	proximal/distal pattern formation	0.000191	0.0332	3.28	14437	17	2587	10	[GLI1 - gli family zinc finger 1, PBX1 - pre-b-cell leukemia homeobox 1, GLI3 - gli family zinc finger 3, HOXA11 - homeobox a11, ALDH1A2 - aldehyde dehydrogenase 1 family, member a2, DLX2 - distal-less homeobox 2, HOXA9 - homeobox a9, HOXC10 - homeobox c10, CYP26B1 - cytochrome p450, family 26, subfamily b, polypeptide 1, LRP4 - low density lipoprotein receptor-related protein 4]
GO:0048731	system development	0.000192	0.033	1.35	14437	514	2587	124	[GFRA2 - gdnf family receptor alpha 2, PAX6 - paired box 6, FLT4 - fms-related tyrosine kinase 4, LIF - leukemia inhibitory factor, ENC1 - ectodermal-neural cortex 1 (with btb domain), GDNF - glial cell derived neurotrophic factor, WFIKKN1 - wap, follistatin/kazal, immunoglobulin, kunitz and netrin domain containing 1, PBX1 - pre-b-cell leukemia homeobox 1, GDA - guanine deaminase, DPF1 - d4, zin…
GO:0097529	myeloid leukocyte migration	0.000197	0.0335	1.93	14437	84	2587	29	[ITGA9 - integrin, alpha 9, CCL3L3 - chemokine (c-c motif) ligand 3-like 3, CCR7 - chemokine (c-c motif) receptor 7, SCG2 - secretogranin ii, MITF - microphthalmia-associated transcription factor, ROR2 - receptor tyrosine kinase-like orphan receptor 2, PDGFB - platelet-derived growth factor beta polypeptide, HRH1 - histamine receptor h1, PPBP - pro-platelet basic protein (chemokine (c-x-c motif) …
GO:0034723	DNA replication-dependent nucleosome organization	0.000203	0.0341	2.91	14437	23	2587	12	[CHAF1B - chromatin assembly factor 1, subunit b (p60), HIST1H3D - histone cluster 1, h3d, ASF1B - anti-silencing function 1b histone chaperone, HIST1H4E - histone cluster 1, h4e, HIST1H4I - histone cluster 1, h4i, HIST1H4H - histone cluster 1, h4h, HIST4H4 - histone cluster 4, h4, HIST1H4C - histone cluster 1, h4c, HIST1H4J - histone cluster 1, h4j, HIST1H4K - histone cluster 1, h4k, HIST1H3J - …
GO:0006335	DNA replication-dependent nucleosome assembly	0.000203	0.0337	2.91	14437	23	2587	12	[CHAF1B - chromatin assembly factor 1, subunit b (p60), HIST1H3D - histone cluster 1, h3d, ASF1B - anti-silencing function 1b histone chaperone, HIST1H4E - histone cluster 1, h4e, HIST1H4I - histone cluster 1, h4i, HIST1H4H - histone cluster 1, h4h, HIST1H4C - histone cluster 1, h4c, HIST4H4 - histone cluster 4, h4, HIST1H4J - histone cluster 1, h4j, HIST1H4K - histone cluster 1, h4k, HIST1H3J - …
GO:0031069	hair follicle morphogenesis	0.000203	0.0333	2.91	14437	23	2587	12	[SNAI1 - snail family zinc finger 1, INTU - inturned planar cell polarity protein, TGFB2 - transforming growth factor, beta 2, SOSTDC1 - sclerostin domain containing 1, SHH - sonic hedgehog, FGF10 - fibroblast growth factor 10, SMO - smoothened, frizzled family receptor, WNT10A - wingless-type mmtv integration site family, member 10a, KRT17 - keratin 17, IGFBP5 - insulin-like growth factor bindin…
GO:0007588	excretion	0.000203	0.0329	2.91	14437	23	2587	12	[AQP3 - aquaporin 3 (gill blood group), AMN - amnion associated transmembrane protein, CLCNKA - chloride channel, voltage-sensitive ka, NEDD4L - neural precursor cell expressed, developmentally down-regulated 4-like, e3 ubiquitin protein ligase, KCNJ1 - potassium inwardly-rectifying channel, subfamily j, member 1, NPHS1 - nephrosis 1, congenital, finnish type (nephrin), AQP7 - aquaporin 7, NPHP1 …
GO:0003013	circulatory system process	0.000206	0.033	1.68	14437	146	2587	44	[TEK - tek tyrosine kinase, endothelial, TRPV4 - transient receptor potential cation channel, subfamily v, member 4, NOS2 - nitric oxide synthase 2, inducible, SLC6A4 - solute carrier family 6 (neurotransmitter transporter), member 4, RCAN1 - regulator of calcineurin 1, STAT1 - signal transducer and activator of transcription 1, 91kda, ADRA2C - adrenoceptor alpha 2c, ATP1A2 - atpase, na+/k+ trans…
GO:0051209	release of sequestered calcium ion into cytosol	0.000208	0.0329	2.48	14437	36	2587	16	[RYR3 - ryanodine receptor 3, CCR5 - chemokine (c-c motif) receptor 5 (gene/pseudogene), CCL19 - chemokine (c-c motif) ligand 19, CCR7 - chemokine (c-c motif) receptor 7, P2RX7 - purinergic receptor p2x, ligand-gated ion channel, 7, DDIT3 - dna-damage-inducible transcript 3, NOL3 - nucleolar protein 3 (apoptosis repressor with card domain), RYR1 - ryanodine receptor 1 (skeletal), FGF2 - fibroblas…
GO:0051283	negative regulation of sequestering of calcium ion	0.000208	0.0326	2.48	14437	36	2587	16	[RYR3 - ryanodine receptor 3, CCR5 - chemokine (c-c motif) receptor 5 (gene/pseudogene), CCL19 - chemokine (c-c motif) ligand 19, CCR7 - chemokine (c-c motif) receptor 7, P2RX7 - purinergic receptor p2x, ligand-gated ion channel, 7, DDIT3 - dna-damage-inducible transcript 3, NOL3 - nucleolar protein 3 (apoptosis repressor with card domain), RYR1 - ryanodine receptor 1 (skeletal), FGF2 - fibroblas…
GO:0098660	inorganic ion transmembrane transport	0.000213	0.033	1.39	14437	410	2587	102	[DDIT3 - dna-damage-inducible transcript 3, TTYH1 - tweety homolog 1 (drosophila), SLC34A3 - solute carrier family 34 (type ii sodium/phosphate contransporter), member 3, JPH3 - junctophilin 3, ANO8 - anoctamin 8, TRPC3 - transient receptor potential cation channel, subfamily c, member 3, SLC9C2 - solute carrier family 9, member c2 (putative), CHRNA9 - cholinergic receptor, nicotinic, alpha 9 (ne…
GO:0007600	sensory perception	0.000213	0.0327	1.47	14437	284	2587	75	[OPRL1 - opiate receptor-like 1, TIMP3 - timp metallopeptidase inhibitor 3, ATP2B2 - atpase, ca++ transporting, plasma membrane 2, PCDH15 - protocadherin-related 15, PAX6 - paired box 6, NLGN2 - neuroligin 2, CDH3 - cadherin 3, type 1, p-cadherin (placental), MIP - major intrinsic protein of lens fiber, MYO3B - myosin iiib, SPTBN4 - spectrin, beta, non-erythrocytic 4, USH2A - usher syndrome 2a (a…
GO:1903522	regulation of blood circulation	0.000223	0.0339	1.55	14437	212	2587	59	[FXYD2 - fxyd domain containing ion transport regulator 2, ATP2B2 - atpase, ca++ transporting, plasma membrane 2, NOS2 - nitric oxide synthase 2, inducible, ADRA2C - adrenoceptor alpha 2c, SPTBN4 - spectrin, beta, non-erythrocytic 4, ATP1A2 - atpase, na+/k+ transporting, alpha 2 polypeptide, CHRM3 - cholinergic receptor, muscarinic 3, NOS1AP - nitric oxide synthase 1 (neuronal) adaptor protein, K…
GO:0048869	cellular developmental process	0.000232	0.0348	1.16	14437	1940	2587	404	[GFAP - glial fibrillary acidic protein, MDGA1 - mam domain containing glycosylphosphatidylinositol anchor 1, GFI1 - growth factor independent 1 transcription repressor, NPAS4 - neuronal pas domain protein 4, KIF20B - kinesin family member 20b, SPTBN4 - spectrin, beta, non-erythrocytic 4, LIF - leukemia inhibitory factor, SEPT4 - septin 4, GDNF - glial cell derived neurotrophic factor, PODXL - po…
GO:0006935	chemotaxis	0.000239	0.0355	1.5	14437	253	2587	68	[CCL3L3 - chemokine (c-c motif) ligand 3-like 3, SEMA4C - sema domain, immunoglobulin domain (ig), transmembrane domain (tm) and short cytoplasmic domain, (semaphorin) 4c, CXCL9 - chemokine (c-x-c motif) ligand 9, CXCL12 - chemokine (c-x-c motif) ligand 12, PLXNB3 - plexin b3, ACKR4 - atypical chemokine receptor 4, HRH1 - histamine receptor h1, XCR1 - chemokine (c motif) receptor 1, CCL19 - chemo…
GO:0071674	mononuclear cell migration	0.000241	0.0354	2.54	14437	33	2587	15	[S100A12 - s100 calcium binding protein a12, CCL19 - chemokine (c-c motif) ligand 19, CCL3L3 - chemokine (c-c motif) ligand 3-like 3, CCL15 - chemokine (c-c motif) ligand 15, CCL8 - chemokine (c-c motif) ligand 8, CCL7 - chemokine (c-c motif) ligand 7, CCL2 - chemokine (c-c motif) ligand 2, CCL1 - chemokine (c-c motif) ligand 1, CCL3L1 - chemokine (c-c motif) ligand 3-like 1, PDGFB - platelet-der…
GO:0051924	regulation of calcium ion transport	0.000248	0.0361	1.64	14437	160	2587	47	[OPRL1 - opiate receptor-like 1, LILRB2 - leukocyte immunoglobulin-like receptor, subfamily b (with tm and itim domains), member 2, EFCAB4A - ef-hand calcium binding domain 4a, STAC - sh3 and cysteine rich domain, ATP2B2 - atpase, ca++ transporting, plasma membrane 2, ATP1A2 - atpase, na+/k+ transporting, alpha 2 polypeptide, CXCL9 - chemokine (c-x-c motif) ligand 9, GNB5 - guanine nucleotide bin…
GO:0048562	embryonic organ morphogenesis	0.000249	0.0359	1.88	14437	89	2587	30	[PITX2 - paired-like homeodomain 2, HOXA11 - homeobox a11, FZD5 - frizzled family receptor 5, HOXB4 - homeobox b4, HOXB3 - homeobox b3, PAX6 - paired box 6, SHH - sonic hedgehog, FGF10 - fibroblast growth factor 10, PAX5 - paired box 5, DLX2 - distal-less homeobox 2, ROR2 - receptor tyrosine kinase-like orphan receptor 2, SHOX2 - short stature homeobox 2, RARB - retinoic acid receptor, beta, GLI3…
GO:0030001	metal ion transport	0.000262	0.0374	1.37	14437	436	2587	107	[DDIT3 - dna-damage-inducible transcript 3, TTYH1 - tweety homolog 1 (drosophila), SLC34A3 - solute carrier family 34 (type ii sodium/phosphate contransporter), member 3, HEPH - hephaestin, JPH3 - junctophilin 3, TRPC3 - transient receptor potential cation channel, subfamily c, member 3, SLC9C2 - solute carrier family 9, member c2 (putative), CHRNA9 - cholinergic receptor, nicotinic, alpha 9 (neu…
GO:0002376	immune system process	0.000283	0.04	1.19	14437	1378	2587	295	[EMP2 - epithelial membrane protein 2, LILRB2 - leukocyte immunoglobulin-like receptor, subfamily b (with tm and itim domains), member 2, BNIP3 - bcl2/adenovirus e1b 19kda interacting protein 3, SPTA1 - spectrin, alpha, erythrocytic 1 (elliptocytosis 2), DHX58 - dexh (asp-glu-x-his) box polypeptide 58, BNIP3L - bcl2/adenovirus e1b 19kda interacting protein 3-like, LIF - leukemia inhibitory factor…
GO:0055065	metal ion homeostasis	0.000288	0.0403	1.4	14437	380	2587	95	[OPRL1 - opiate receptor-like 1, TRPV4 - transient receptor potential cation channel, subfamily v, member 4, BNIP3 - bcl2/adenovirus e1b 19kda interacting protein 3, GALR2 - galanin receptor 2, CHRNA7 - cholinergic receptor, nicotinic, alpha 7 (neuronal), ATP2B2 - atpase, ca++ transporting, plasma membrane 2, TRIM24 - tripartite motif containing 24, GPR55 - g protein-coupled receptor 55, DDIT3 - …
GO:0007062	sister chromatid cohesion	0.000292	0.0405	1.79	14437	106	2587	34	[CENPA - centromere protein a, ERCC6L - excision repair cross-complementing rodent repair deficiency, complementation group 6-like, CDC20 - cell division cycle 20, BIRC5 - baculoviral iap repeat containing 5, ITGB3BP - integrin beta 3 binding protein (beta3-endonexin), CENPE - centromere protein e, 312kda, CENPM - centromere protein m, SGOL1 - shugoshin-like 1 (s. pombe), AURKB - aurora kinase b,…
GO:0051240	positive regulation of multicellular organismal process	0.000313	0.0429	1.22	14437	1139	2587	248	[HSPA1A - heat shock 70kda protein 1a, GFAP - glial fibrillary acidic protein, LILRB2 - leukocyte immunoglobulin-like receptor, subfamily b (with tm and itim domains), member 2, HSPA1B - heat shock 70kda protein 1b, DHX58 - dexh (asp-glu-x-his) box polypeptide 58, KIF20B - kinesin family member 20b, TNFRSF12A - tumor necrosis factor receptor superfamily, member 12a, BRCA1 - breast cancer 1, early…
GO:0098662	inorganic cation transmembrane transport	0.000337	0.0458	1.4	14437	358	2587	90	[FXYD2 - fxyd domain containing ion transport regulator 2, KCNH4 - potassium voltage-gated channel, subfamily h (eag-related), member 4, TRPV4 - transient receptor potential cation channel, subfamily v, member 4, SLC6A8 - solute carrier family 6 (neurotransmitter transporter), member 8, ATP6V1C2 - atpase, h+ transporting, lysosomal 42kda, v1 subunit c2, ATP2B2 - atpase, ca++ transporting, plasma …
GO:0019730	antimicrobial humoral response	0.00034	0.0457	2.79	14437	24	2587	12	[ANG - angiogenin, ribonuclease, rnase a family, 5, HIST1H2BC - histone cluster 1, h2bc, HIST2H2BE - histone cluster 2, h2be, HIST1H2BE - histone cluster 1, h2be, HIST1H2BJ - histone cluster 1, h2bj, HIST1H2BF - histone cluster 1, h2bf, IL36RN - interleukin 36 receptor antagonist, SEMG1 - semenogelin i, CAMP - cathelicidin antimicrobial peptide, SEMG2 - semenogelin ii, HIST1H2BK - histone cluster…
GO:0098655	cation transmembrane transport	0.00035	0.0467	1.38	14437	401	2587	99	[PQLC2 - pq loop repeat containing 2, DDIT3 - dna-damage-inducible transcript 3, SLC34A3 - solute carrier family 34 (type ii sodium/phosphate contransporter), member 3, TTYH1 - tweety homolog 1 (drosophila), JPH3 - junctophilin 3, TRPC3 - transient receptor potential cation channel, subfamily c, member 3, SLC9C2 - solute carrier family 9, member c2 (putative), CHRNA9 - cholinergic receptor, nicot…
GO:0019731	antibacterial humoral response	0.000359	0.0474	2.92	14437	21	2587	11	[ANG - angiogenin, ribonuclease, rnase a family, 5, HIST1H2BC - histone cluster 1, h2bc, HIST2H2BE - histone cluster 2, h2be, HIST1H2BJ - histone cluster 1, h2bj, HIST1H2BE - histone cluster 1, h2be, HIST1H2BF - histone cluster 1, h2bf, SEMG1 - semenogelin i, CAMP - cathelicidin antimicrobial peptide, SEMG2 - semenogelin ii, HIST1H2BK - histone cluster 1, h2bk, HIST1H2BG - histone cluster 1, h2bg]
GO:0048870	cell motility	0.000374	0.049	1.28	14437	679	2587	156	[MDGA1 - mam domain containing glycosylphosphatidylinositol anchor 1, EMP2 - epithelial membrane protein 2, FAM83D - family with sequence similarity 83, member d, CDK1 - cyclin-dependent kinase 1, CD244 - cd244 molecule, natural killer cell receptor 2b4, MITF - microphthalmia-associated transcription factor, PAX6 - paired box 6, SEMA4C - sema domain, immunoglobulin domain (ig), transmembrane doma…
GO:0050678	regulation of epithelial cell proliferation	0.000403	0.0523	1.5	14437	230	2587	62	[BRCA2 - breast cancer 2, early onset, PAX6 - paired box 6, FLT4 - fms-related tyrosine kinase 4, CDH3 - cadherin 3, type 1, p-cadherin (placental), CXCL12 - chemokine (c-x-c motif) ligand 12, PTPRN - protein tyrosine phosphatase, receptor type, n, WNT10B - wingless-type mmtv integration site family, member 10b, PLXNB3 - plexin b3, ESRP2 - epithelial splicing regulatory protein 2, SPARC - secrete…
GO:0006928	movement of cell or subcellular component	0.000412	0.0529	1.22	14437	1037	2587	227	[MDGA1 - mam domain containing glycosylphosphatidylinositol anchor 1, EMP2 - epithelial membrane protein 2, SPTA1 - spectrin, alpha, erythrocytic 1 (elliptocytosis 2), FAM83D - family with sequence similarity 83, member d, KIF20B - kinesin family member 20b, SEMA4C - sema domain, immunoglobulin domain (ig), transmembrane domain (tm) and short cytoplasmic domain, (semaphorin) 4c, SPTBN4 - spectrin…
GO:0071310	cellular response to organic substance	0.000435	0.0553	1.24	14437	876	2587	195	[RGS19 - regulator of g-protein signaling 19, LILRB2 - leukocyte immunoglobulin-like receptor, subfamily b (with tm and itim domains), member 2, GFI1 - growth factor independent 1 transcription repressor, NPAS4 - neuronal pas domain protein 4, ELK1 - elk1, member of ets oncogene family, AANAT - aralkylamine n-acetyltransferase, BRCA1 - breast cancer 1, early onset, GATSL3 - gats protein-like 3, P…
GO:0007126	meiotic nuclear division	0.000435	0.0549	2.05	14437	60	2587	22	[DUSP13 - dual specificity phosphatase 13, C17orf104 - chromosome 17 open reading frame 104, TRIP13 - thyroid hormone receptor interactor 13, DAZL - deleted in azoospermia-like, BRCA2 - breast cancer 2, early onset, KIF18A - kinesin family member 18a, TUBGCP5 - tubulin, gamma complex associated protein 5, RAD54L - rad54-like (s. cerevisiae), FANCA - fanconi anemia, complementation group a, CDC25B…
GO:0007188	adenylate cyclase-modulating G-protein coupled receptor signaling pathway	0.000466	0.0582	1.8	14437	96	2587	31	[GRK5 - g protein-coupled receptor kinase 5, OPRL1 - opiate receptor-like 1, GALR2 - galanin receptor 2, FFAR3 - free fatty acid receptor 3, SLC9A3R1 - solute carrier family 9, subfamily a (nhe3, cation proton antiporter 3), member 3 regulator 1, ADRA2C - adrenoceptor alpha 2c, CHRM3 - cholinergic receptor, muscarinic 3, GALR1 - galanin receptor 1, CHRM5 - cholinergic receptor, muscarinic 5, CORT…
GO:0043486	histone exchange	0.000468	0.058	2.16	14437	49	2587	19	[CENPA - centromere protein a, HIST1H4I - histone cluster 1, h4i, ITGB3BP - integrin beta 3 binding protein (beta3-endonexin), OIP5 - opa interacting protein 5, CENPM - centromere protein m, HIST1H4K - histone cluster 1, h4k, CENPK - centromere protein k, CASC5 - cancer susceptibility candidate 5, CHD5 - chromodomain helicase dna binding protein 5, HIST1H4E - histone cluster 1, h4e, HIST1H4H - hi…
GO:0006836	neurotransmitter transport	0.000469	0.0576	1.97	14437	68	2587	24	[SYN1 - synapsin i, SV2A - synaptic vesicle glycoprotein 2a, SLC6A12 - solute carrier family 6 (neurotransmitter transporter), member 12, SLC6A8 - solute carrier family 6 (neurotransmitter transporter), member 8, DGKI - diacylglycerol kinase, iota, BRSK1 - br serine/threonine kinase 1, RAB3A - rab3a, member ras oncogene family, SLC6A4 - solute carrier family 6 (neurotransmitter transporter), memb…
GO:0000819	sister chromatid segregation	0.000484	0.059	2.59	14437	28	2587	13	[CENPA - centromere protein a, PLK1 - polo-like kinase 1, NEK2 - nima-related kinase 2, MAD2L1 - mad2 mitotic arrest deficient-like 1 (yeast), NDC80 - ndc80 kinetochore complex component, NUSAP1 - nucleolar and spindle associated protein 1, SPAG5 - sperm associated antigen 5, KIF25 - kinesin family member 25, KIFC1 - kinesin family member c1, TOP2A - topoisomerase (dna) ii alpha 170kda, ZWINT - z…
GO:0098813	nuclear chromosome segregation	0.000527	0.0636	2.39	14437	35	2587	15	[CENPA - centromere protein a, PLK1 - polo-like kinase 1, NEK2 - nima-related kinase 2, MAD2L1 - mad2 mitotic arrest deficient-like 1 (yeast), SGOL1 - shugoshin-like 1 (s. pombe), NDC80 - ndc80 kinetochore complex component, NUSAP1 - nucleolar and spindle associated protein 1, TTK - ttk protein kinase, SPAG5 - sperm associated antigen 5, KIF25 - kinesin family member 25, KIFC1 - kinesin family me…
GO:0000070	mitotic sister chromatid segregation	0.000547	0.0655	2.68	14437	25	2587	12	[KIFC1 - kinesin family member c1, CENPA - centromere protein a, PLK1 - polo-like kinase 1, NEK2 - nima-related kinase 2, MAD2L1 - mad2 mitotic arrest deficient-like 1 (yeast), ZWINT - zw10 interacting kinetochore protein, KIF18B - kinesin family member 18b, NUSAP1 - nucleolar and spindle associated protein 1, NDC80 - ndc80 kinetochore complex component, ZNF207 - zinc finger protein 207, KIF25 - …
GO:0000083	regulation of transcription involved in G1/S transition of mitotic cell cycle	0.000547	0.065	2.68	14437	25	2587	12	[ID2 - inhibitor of dna binding 2, dominant negative helix-loop-helix protein, CCNA1 - cyclin a1, CDC6 - cell division cycle 6, GFI1 - growth factor independent 1 transcription repressor, CDK1 - cyclin-dependent kinase 1, ORC1 - origin recognition complex, subunit 1, CDC45 - cell division cycle 45, CCNE1 - cyclin e1, CDT1 - chromatin licensing and dna replication factor 1, TYMS - thymidylate synt…
GO:0010463	mesenchymal cell proliferation	0.000573	0.0675	3.43	14437	13	2587	8	[BMP2 - bone morphogenetic protein 2, DCHS1 - dachsous 1 (drosophila), GPC3 - glypican 3, SHH - sonic hedgehog, STAT1 - signal transducer and activator of transcription 1, 91kda, BMP4 - bone morphogenetic protein 4, SIX2 - six homeobox 2, FGF7 - fibroblast growth factor 7]
GO:0050830	defense response to Gram-positive bacterium	0.000576	0.0673	2.18	14437	46	2587	18	[ANG - angiogenin, ribonuclease, rnase a family, 5, IL27RA - interleukin 27 receptor, alpha, P2RX7 - purinergic receptor p2x, ligand-gated ion channel, 7, HIST1H2BC - histone cluster 1, h2bc, HIST2H2BE - histone cluster 2, h2be, MYD88 - myeloid differentiation primary response 88, MBL2 - mannose-binding lectin (protein c) 2, soluble, LBP - lipopolysaccharide binding protein, CAMP - cathelicidin a…
GO:0035107	appendage morphogenesis	0.000608	0.0704	1.88	14437	77	2587	26	[PITX2 - paired-like homeodomain 2, RNF165 - ring finger protein 165, HOXA11 - homeobox a11, SHH - sonic hedgehog, ZNF358 - zinc finger protein 358, SHOX2 - short stature homeobox 2, CYP26B1 - cytochrome p450, family 26, subfamily b, polypeptide 1, RARB - retinoic acid receptor, beta, PBX1 - pre-b-cell leukemia homeobox 1, GLI3 - gli family zinc finger 3, TWIST1 - twist basic helix-loop-helix tra…
GO:0035108	limb morphogenesis	0.000608	0.0699	1.88	14437	77	2587	26	[PITX2 - paired-like homeodomain 2, RNF165 - ring finger protein 165, HOXA11 - homeobox a11, SHH - sonic hedgehog, ZNF358 - zinc finger protein 358, SHOX2 - short stature homeobox 2, CYP26B1 - cytochrome p450, family 26, subfamily b, polypeptide 1, RARB - retinoic acid receptor, beta, PBX1 - pre-b-cell leukemia homeobox 1, GLI3 - gli family zinc finger 3, TWIST1 - twist basic helix-loop-helix tra…
GO:1902656	calcium ion import into cytosol	0.000624	0.071	2.29	14437	39	2587	16	[RYR3 - ryanodine receptor 3, CCR5 - chemokine (c-c motif) receptor 5 (gene/pseudogene), CCL19 - chemokine (c-c motif) ligand 19, CCR7 - chemokine (c-c motif) receptor 7, P2RX7 - purinergic receptor p2x, ligand-gated ion channel, 7, DDIT3 - dna-damage-inducible transcript 3, NOL3 - nucleolar protein 3 (apoptosis repressor with card domain), RYR1 - ryanodine receptor 1 (skeletal), FGF2 - fibroblas…
GO:0097553	calcium ion transmembrane import into cytosol	0.000624	0.0705	2.29	14437	39	2587	16	[RYR3 - ryanodine receptor 3, CCR5 - chemokine (c-c motif) receptor 5 (gene/pseudogene), CCL19 - chemokine (c-c motif) ligand 19, CCR7 - chemokine (c-c motif) receptor 7, P2RX7 - purinergic receptor p2x, ligand-gated ion channel, 7, DDIT3 - dna-damage-inducible transcript 3, NOL3 - nucleolar protein 3 (apoptosis repressor with card domain), RYR1 - ryanodine receptor 1 (skeletal), FGF2 - fibroblas…
GO:0006336	DNA replication-independent nucleosome assembly	0.00063	0.0706	2.12	14437	50	2587	19	[ASF1B - anti-silencing function 1b histone chaperone, CENPA - centromere protein a, HIST1H4I - histone cluster 1, h4i, ITGB3BP - integrin beta 3 binding protein (beta3-endonexin), OIP5 - opa interacting protein 5, CENPM - centromere protein m, HIST1H4K - histone cluster 1, h4k, CENPK - centromere protein k, CASC5 - cancer susceptibility candidate 5, HIST1H4E - histone cluster 1, h4e, HIST1H4H - …
GO:0007193	adenylate cyclase-inhibiting G-protein coupled receptor signaling pathway	0.00063	0.0701	2.12	14437	50	2587	19	[OPRL1 - opiate receptor-like 1, FFAR3 - free fatty acid receptor 3, P2RY12 - purinergic receptor p2y, g-protein coupled, 12, GNAZ - guanine nucleotide binding protein (g protein), alpha z polypeptide, CHRM3 - cholinergic receptor, muscarinic 3, CHRM5 - cholinergic receptor, muscarinic 5, GNAL - guanine nucleotide binding protein (g protein), alpha activating activity polypeptide, olfactory type,…
GO:0045596	negative regulation of cell differentiation	0.000645	0.0711	1.32	14437	485	2587	115	[GFAP - glial fibrillary acidic protein, GFI1 - growth factor independent 1 transcription repressor, GPR55 - g protein-coupled receptor 55, PAX6 - paired box 6, SEMA4C - sema domain, immunoglobulin domain (ig), transmembrane domain (tm) and short cytoplasmic domain, (semaphorin) 4c, DDIT3 - dna-damage-inducible transcript 3, PBX1 - pre-b-cell leukemia homeobox 1, SOSTDC1 - sclerostin domain conta…
GO:0051302	regulation of cell division	0.000649	0.071	1.74	14437	106	2587	33	[CDC6 - cell division cycle 6, KIF14 - kinesin family member 14, KIF20B - kinesin family member 20b, SHH - sonic hedgehog, MDK - midkine (neurite growth-promoting factor 2), PAX6 - paired box 6, BRCA2 - breast cancer 2, early onset, AURKB - aurora kinase b, CDC25B - cell division cycle 25b, E2F8 - e2f transcription factor 8, PDGFB - platelet-derived growth factor beta polypeptide, FGF7 - fibrobla…
GO:0050896	response to stimulus	0.000667	0.0724	1.1	14437	3616	2587	713	[GFAP - glial fibrillary acidic protein, GFI1 - growth factor independent 1 transcription repressor, NPAS4 - neuronal pas domain protein 4, WDR76 - wd repeat domain 76, AANAT - aralkylamine n-acetyltransferase, LIF - leukemia inhibitory factor, GATSL3 - gats protein-like 3, LIFR - leukemia inhibitory factor receptor alpha, SH2D1B - sh2 domain containing 1b, CHAF1B - chromatin assembly factor 1, s…
ved growth factor d, MAP1LC3B2 - microtubule-associated protein 1 light chain 3 beta 2, TNFSF13B - tumor necrosis factor (ligand) superfamily, member 13b, BCAR3 - breast cancer anti-estrogen resistance 3, IL20 - interleukin 20, CLU - clusterin, RAP1GAP - rap1 gtpase activating protein, CXCR6 - chemokine (c-x-c motif) receptor 6, RAP2A - rap2a, member of ras oncogene family, TFPI - tissue factor p…
GO:0034097	response to cytokine	0.000685	0.0738	1.4	14437	318	2587	80	[IFIT2 - interferon-induced protein with tetratricopeptide repeats 2, IFIT1 - interferon-induced protein with tetratricopeptide repeats 1, IFIT3 - interferon-induced protein with tetratricopeptide repeats 3, CCL3L3 - chemokine (c-c motif) ligand 3-like 3, NOS2 - nitric oxide synthase 2, inducible, CIITA - class ii, major histocompatibility complex, transactivator, AANAT - aralkylamine n-acetyltra…
GO:0009798	axis specification	0.000707	0.0757	2.02	14437	58	2587	21	[RGS19 - regulator of g-protein signaling 19, PITX2 - paired-like homeodomain 2, TBX6 - t-box 6, CITED1 - cbp/p300-interacting transactivator, with glu/asp-rich carboxy-terminal domain, 1, FZD5 - frizzled family receptor 5, GPC3 - glypican 3, PAX6 - paired box 6, FGF10 - fibroblast growth factor 10, SIX2 - six homeobox 2, PKD1L1 - polycystic kidney disease 1 like 1, KDM6A - lysine (k)-specific de…
GO:0051282	regulation of sequestering of calcium ion	0.000741	0.0787	1.82	14437	86	2587	28	[CCR5 - chemokine (c-c motif) receptor 5 (gene/pseudogene), CCR7 - chemokine (c-c motif) receptor 7, DDIT3 - dna-damage-inducible transcript 3, CXCL9 - chemokine (c-x-c motif) ligand 9, ATP1A2 - atpase, na+/k+ transporting, alpha 2 polypeptide, FGF2 - fibroblast growth factor 2 (basic), JPH3 - junctophilin 3, HTR2C - 5-hydroxytryptamine (serotonin) receptor 2c, g protein-coupled, TRPC1 - transien…
GO:1903046	meiotic cell cycle process	0.000746	0.0787	1.62	14437	141	2587	41	[C17orf104 - chromosome 17 open reading frame 104, CCNE2 - cyclin e2, SYCP1 - synaptonemal complex protein 1, BRCA2 - breast cancer 2, early onset, RAD54L - rad54-like (s. cerevisiae), TUBGCP5 - tubulin, gamma complex associated protein 5, CCNE1 - cyclin e1, KIF18A - kinesin family member 18a, SGOL1 - shugoshin-like 1 (s. pombe), FANCA - fanconi anemia, complementation group a, PLD6 - phospholipa…
GO:0009953	dorsal/ventral pattern formation	0.000755	0.079	2.33	14437	36	2587	15	[TTC21B - tetratricopeptide repeat domain 21b, HOXA11 - homeobox a11, INTU - inturned planar cell polarity protein, LMX1B - lim homeobox transcription factor 1, beta, PAX6 - paired box 6, SHH - sonic hedgehog, HHIP - hedgehog interacting protein, LRP4 - low density lipoprotein receptor-related protein 4, GLI1 - gli family zinc finger 1, GLI3 - gli family zinc finger 3, SMO - smoothened, frizzled …
GO:0044236	multicellular organism metabolic process	0.000759	0.0788	1.86	14437	78	2587	26	[AKR1C3 - aldo-keto reductase family 1, member c3, TRPV4 - transient receptor potential cation channel, subfamily v, member 4, ADAMTS3 - adam metallopeptidase with thrombospondin type 1 motif, 3, LEPREL2 - leprecan-like 2, COL6A6 - collagen, type vi, alpha 6, PPARGC1A - peroxisome proliferator-activated receptor gamma, coactivator 1 alpha, ACE - angiotensin i converting enzyme, MMP1 - matrix meta…
GO:0001501	skeletal system development	0.000817	0.0843	1.67	14437	120	2587	36	[ADAMTS4 - adam metallopeptidase with thrombospondin type 1 motif, 4, HOXA11 - homeobox a11, PAPSS2 - 3'-phosphoadenosine 5'-phosphosulfate synthase 2, CMKLR1 - chemokine-like receptor 1, SHH - sonic hedgehog, SHOX2 - short stature homeobox 2, DLL3 - delta-like 3 (drosophila), WFIKKN1 - wap, follistatin/kazal, immunoglobulin, kunitz and netrin domain containing 1, PBX1 - pre-b-cell leukemia homeo…
GO:0050921	positive regulation of chemotaxis	0.000836	0.0856	1.75	14437	99	2587	31	[CCR4 - chemokine (c-c motif) receptor 4, TRPV4 - transient receptor potential cation channel, subfamily v, member 4, SCG2 - secretogranin ii, CCR7 - chemokine (c-c motif) receptor 7, CMKLR1 - chemokine-like receptor 1, FGF10 - fibroblast growth factor 10, ARTN - artemin, CXCL9 - chemokine (c-x-c motif) ligand 9, ITGA2 - integrin, alpha 2 (cd49b, alpha 2 subunit of vla-2 receptor), CXCL12 - chemo…
GO:0034724	DNA replication-independent nucleosome organization	0.000837	0.0851	2.08	14437	51	2587	19	[ASF1B - anti-silencing function 1b histone chaperone, CENPA - centromere protein a, HIST1H4I - histone cluster 1, h4i, ITGB3BP - integrin beta 3 binding protein (beta3-endonexin), OIP5 - opa interacting protein 5, CENPM - centromere protein m, HIST1H4K - histone cluster 1, h4k, CENPK - centromere protein k, CASC5 - cancer susceptibility candidate 5, HIST1H4E - histone cluster 1, h4e, HIST1H4H - …
GO:0033993	response to lipid	0.000857	0.0865	1.29	14437	572	2587	132	[OPRL1 - opiate receptor-like 1, LILRB2 - leukocyte immunoglobulin-like receptor, subfamily b (with tm and itim domains), member 2, GFI1 - growth factor independent 1 transcription repressor, NPAS4 - neuronal pas domain protein 4, ELK1 - elk1, member of ets oncogene family, AANAT - aralkylamine n-acetyltransferase, PAQR9 - progestin and adipoq receptor family member ix, CXCL9 - chemokine (c-x-c m…
GO:0010562	positive regulation of phosphorus metabolic process	0.000868	0.087	1.23	14437	837	2587	185	[OPRL1 - opiate receptor-like 1, CDC6 - cell division cycle 6, EMP2 - epithelial membrane protein 2, MAGI2 - membrane associated guanylate kinase, ww and pdz domain containing 2, GFRA2 - gdnf family receptor alpha 2, CDK1 - cyclin-dependent kinase 1, CD244 - cd244 molecule, natural killer cell receptor 2b4, GPR55 - g protein-coupled receptor 55, SEMA4C - sema domain, immunoglobulin domain (ig), t…
GO:0045937	positive regulation of phosphate metabolic process	0.000868	0.0864	1.23	14437	837	2587	185	[OPRL1 - opiate receptor-like 1, CDC6 - cell division cycle 6, EMP2 - epithelial membrane protein 2, MAGI2 - membrane associated guanylate kinase, ww and pdz domain containing 2, GFRA2 - gdnf family receptor alpha 2, CDK1 - cyclin-dependent kinase 1, CD244 - cd244 molecule, natural killer cell receptor 2b4, GPR55 - g protein-coupled receptor 55, SEMA4C - sema domain, immunoglobulin domain (ig), t…
GO:0050880	regulation of blood vessel size	0.000887	0.0876	1.78	14437	91	2587	29	[SLC6A4 - solute carrier family 6 (neurotransmitter transporter), member 4, NOS2 - nitric oxide synthase 2, inducible, ADRA2C - adrenoceptor alpha 2c, ATP1A2 - atpase, na+/k+ transporting, alpha 2 polypeptide, CHRM3 - cholinergic receptor, muscarinic 3, EGFR - epidermal growth factor receptor, ACE - angiotensin i converting enzyme, NTS - neurotensin, AVPR1B - arginine vasopressin receptor 1b, GCL…
GO:0007059	chromosome segregation	0.000887	0.087	1.78	14437	91	2587	29	[CENPA - centromere protein a, NEK2 - nima-related kinase 2, CENPE - centromere protein e, 312kda, NUF2 - nuf2, ndc80 kinetochore complex component, SGOL1 - shugoshin-like 1 (s. pombe), CENPF - centromere protein f, 350/400kda, BRCA1 - breast cancer 1, early onset, SPAG5 - sperm associated antigen 5, ESCO2 - establishment of sister chromatid cohesion n-acetyltransferase 2, TOP2A - topoisomerase (…
GO:0035150	regulation of tube size	0.000887	0.0864	1.78	14437	91	2587	29	[SLC6A4 - solute carrier family 6 (neurotransmitter transporter), member 4, NOS2 - nitric oxide synthase 2, inducible, ADRA2C - adrenoceptor alpha 2c, ATP1A2 - atpase, na+/k+ transporting, alpha 2 polypeptide, CHRM3 - cholinergic receptor, muscarinic 3, EGFR - epidermal growth factor receptor, ACE - angiotensin i converting enzyme, NTS - neurotensin, AVPR1B - arginine vasopressin receptor 1b, GCL…
GO:0051781	positive regulation of cell division	0.000937	0.0907	1.95	14437	63	2587	22	[CDC6 - cell division cycle 6, KIF14 - kinesin family member 14, VEGFA - vascular endothelial growth factor a, TGFB2 - transforming growth factor, beta 2, TGFB3 - transforming growth factor, beta 3, KIF20B - kinesin family member 20b, MDK - midkine (neurite growth-promoting factor 2), SHH - sonic hedgehog, AURKB - aurora kinase b, CDC25B - cell division cycle 25b, PDGFB - platelet-derived growth …
GO:0008300	isoprenoid catabolic process	0.00094	0.0903	4.65	14437	6	2587	5	[AKR1C3 - aldo-keto reductase family 1, member c3, BCO2 - beta-carotene oxygenase 2, AKR1B10 - aldo-keto reductase family 1, member b10 (aldose reductase), CRABP1 - cellular retinoic acid binding protein 1, CYP26B1 - cytochrome p450, family 26, subfamily b, polypeptide 1]
GO:0006333	chromatin assembly or disassembly	0.000942	0.0899	1.84	14437	79	2587	26	[HIST1H3D - histone cluster 1, h3d, CENPA - centromere protein a, HIST1H4I - histone cluster 1, h4i, ITGB3BP - integrin beta 3 binding protein (beta3-endonexin), CENPM - centromere protein m, HIST1H1D - histone cluster 1, h1d, HIST1H4K - histone cluster 1, h4k, HIST1H1C - histone cluster 1, h1c, CENPK - centromere protein k, HIST1H3J - histone cluster 1, h3j, HIST1H3H - histone cluster 1, h3h, CH…
GO:0050727	regulation of inflammatory response	0.000974	0.0923	1.45	14437	242	2587	63	[TRPV4 - transient receptor potential cation channel, subfamily v, member 4, CCL3L3 - chemokine (c-c motif) ligand 3-like 3, NOS2 - nitric oxide synthase 2, inducible, F12 - coagulation factor xii (hageman factor), FABP4 - fatty acid binding protein 4, adipocyte, FANCA - fanconi anemia, complementation group a, IL12B - interleukin 12b (natural killer cell stimulatory factor 2, cytotoxic lymphocyt…
GO:0051276	chromosome organization	0.000993	0.0935	1.35	14437	379	2587	92	[HIST1H3D - histone cluster 1, h3d, C17orf104 - chromosome 17 open reading frame 104, RFC4 - replication factor c (activator 1) 4, 37kda, CDC20 - cell division cycle 20, BIRC5 - baculoviral iap repeat containing 5, CCNE2 - cyclin e2, ITGB3BP - integrin beta 3 binding protein (beta3-endonexin), CDK1 - cyclin-dependent kinase 1, SYCP1 - synaptonemal complex protein 1, RFC1 - replication factor c (a…

## Sheet: H37Ra 36 Hours
GO Term	Description	P-value	FDR q-value	Enrichment	N	B	n	b	Genes
GO:0023052	signaling	3.71e-17	5.24e-13	1.8	14437	472	2998	176	[OPRL1 - opiate receptor-like 1, LHB - luteinizing hormone beta polypeptide, LILRB2 - leukocyte immunoglobulin-like receptor, subfamily b (with tm and itim domains), member 2, GALR2 - galanin receptor 2, GPR52 - g protein-coupled receptor 52, CXCL9 - chemokine (c-x-c motif) ligand 9, CORT - cortistatin, INHBA - inhibin, beta a, CD70 - cd70 molecule, PMCH - pro-melanin-concentrating hormone, BST2 …
GO:0044700	single organism signaling	4.24e-17	2.99e-13	1.8	14437	469	2998	175	[OPRL1 - opiate receptor-like 1, LHB - luteinizing hormone beta polypeptide, LILRB2 - leukocyte immunoglobulin-like receptor, subfamily b (with tm and itim domains), member 2, GALR2 - galanin receptor 2, GPR52 - g protein-coupled receptor 52, CXCL9 - chemokine (c-x-c motif) ligand 9, CORT - cortistatin, INHBA - inhibin, beta a, CD70 - cd70 molecule, PMCH - pro-melanin-concentrating hormone, BST2 …
GO:0007267	cell-cell signaling	1.84e-16	8.66e-13	1.83	14437	422	2998	160	[OPRL1 - opiate receptor-like 1, LHB - luteinizing hormone beta polypeptide, LILRB2 - leukocyte immunoglobulin-like receptor, subfamily b (with tm and itim domains), member 2, GALR2 - galanin receptor 2, GPR52 - g protein-coupled receptor 52, CXCL9 - chemokine (c-x-c motif) ligand 9, CORT - cortistatin, INHBA - inhibin, beta a, CD70 - cd70 molecule, PMCH - pro-melanin-concentrating hormone, BST2 …
GO:0032501	multicellular organismal process	7.63e-16	2.69e-12	1.31	14437	2308	2998	626	[NPAS4 - neuronal pas domain protein 4, PHF21A - phd finger protein 21a, ABAT - 4-aminobutyrate aminotransferase, CATSPER2 - cation channel, sperm associated 2, GDNF - glial cell derived neurotrophic factor, ESRP2 - epithelial splicing regulatory protein 2, LDLR - low density lipoprotein receptor, PMCH - pro-melanin-concentrating hormone, GCNT2 - glucosaminyl (n-acetyl) transferase 2, i-branching…
GO:0006952	defense response	9.83e-16	2.78e-12	1.57	14437	785	2998	256	[LILRB2 - leukocyte immunoglobulin-like receptor, subfamily b (with tm and itim domains), member 2, BNIP3 - bcl2/adenovirus e1b 19kda interacting protein 3, DHX58 - dexh (asp-glu-x-his) box polypeptide 58, BLNK - b-cell linker, SH2D1B - sh2 domain containing 1b, BST2 - bone marrow stromal cell antigen 2, PMAIP1 - phorbol-12-myristate-13-acetate-induced protein 1, PML - promyelocytic leukemia, HRH…
GO:0003008	system process	8.03e-14	1.89e-10	1.5	14437	859	2998	268	[EMP2 - epithelial membrane protein 2, GALR2 - galanin receptor 2, NPAS4 - neuronal pas domain protein 4, HSF4 - heat shock transcription factor 4, GDNF - glial cell derived neurotrophic factor, BTC - betacellulin, LDLR - low density lipoprotein receptor, AMN - amnion associated transmembrane protein, PNOC - prepronociceptin, KCNE1L - kcne1-like, HRH1 - histamine receptor h1, CHRNA9 - cholinergic…
GO:0007154	cell communication	1.52e-12	3.06e-09	1.59	14437	586	2998	193	[LHB - luteinizing hormone beta polypeptide, LILRB2 - leukocyte immunoglobulin-like receptor, subfamily b (with tm and itim domains), member 2, GALR2 - galanin receptor 2, CORT - cortistatin, PMCH - pro-melanin-concentrating hormone, BST2 - bone marrow stromal cell antigen 2, PMAIP1 - phorbol-12-myristate-13-acetate-induced protein 1, PNOC - prepronociceptin, CEACAM6 - carcinoembryonic antigen-re…
GO:0007186	G-protein coupled receptor signaling pathway	1.87e-12	3.3e-09	1.63	14437	504	2998	171	[OPRL1 - opiate receptor-like 1, RGS19 - regulator of g-protein signaling 19, LHB - luteinizing hormone beta polypeptide, GALR2 - galanin receptor 2, OR1F1 - olfactory receptor, family 1, subfamily f, member 1, GPR52 - g protein-coupled receptor 52, GPR55 - g protein-coupled receptor 55, GNG13 - guanine nucleotide binding protein (g protein), gamma 13, CXCL9 - chemokine (c-x-c motif) ligand 9, CX…
GO:0006955	immune response	9.35e-12	1.47e-08	1.52	14437	682	2998	215	[LILRB2 - leukocyte immunoglobulin-like receptor, subfamily b (with tm and itim domains), member 2, EMP2 - epithelial membrane protein 2, DHX58 - dexh (asp-glu-x-his) box polypeptide 58, BLNK - b-cell linker, CD274 - cd274 molecule, SH2D1B - sh2 domain containing 1b, BST2 - bone marrow stromal cell antigen 2, PML - promyelocytic leukemia, TLR8 - toll-like receptor 8, LGALS3 - lectin, galactoside-…
GO:0043207	response to external biotic stimulus	2.15e-11	3.04e-08	1.58	14437	544	2998	178	[IFITM1 - interferon induced transmembrane protein 1, LILRB2 - leukocyte immunoglobulin-like receptor, subfamily b (with tm and itim domains), member 2, GFI1 - growth factor independent 1 transcription repressor, BNIP3 - bcl2/adenovirus e1b 19kda interacting protein 3, DHX58 - dexh (asp-glu-x-his) box polypeptide 58, CXCL9 - chemokine (c-x-c motif) ligand 9, CXCL12 - chemokine (c-x-c motif) ligan…
GO:0098542	defense response to other organism	3.46e-11	4.44e-08	1.84	14437	267	2998	102	[IFITM1 - interferon induced transmembrane protein 1, BNIP3 - bcl2/adenovirus e1b 19kda interacting protein 3, DHX58 - dexh (asp-glu-x-his) box polypeptide 58, CXCL9 - chemokine (c-x-c motif) ligand 9, IL12B - interleukin 12b (natural killer cell stimulatory factor 2, cytotoxic lymphocyte maturation factor 2, p40), IL12A - interleukin 12a (natural killer cell stimulatory factor 1, cytotoxic lymph…
GO:0009607	response to biotic stimulus	6.54e-11	7.7e-08	1.55	14437	566	2998	182	[IFITM1 - interferon induced transmembrane protein 1, LILRB2 - leukocyte immunoglobulin-like receptor, subfamily b (with tm and itim domains), member 2, GFI1 - growth factor independent 1 transcription repressor, BNIP3 - bcl2/adenovirus e1b 19kda interacting protein 3, DHX58 - dexh (asp-glu-x-his) box polypeptide 58, DDIT3 - dna-damage-inducible transcript 3, CXCL9 - chemokine (c-x-c motif) ligan…
GO:0051707	response to other organism	1.31e-10	1.42e-07	1.68	14437	366	2998	128	[IFITM1 - interferon induced transmembrane protein 1, BNIP3 - bcl2/adenovirus e1b 19kda interacting protein 3, DHX58 - dexh (asp-glu-x-his) box polypeptide 58, CXCL9 - chemokine (c-x-c motif) ligand 9, CXCL12 - chemokine (c-x-c motif) ligand 12, IL12B - interleukin 12b (natural killer cell stimulatory factor 2, cytotoxic lymphocyte maturation factor 2, p40), IL12A - interleukin 12a (natural kille…
GO:0007165	signal transduction	1.31e-10	1.32e-07	1.19	14437	3454	2998	851	[GFRA2 - gdnf family receptor alpha 2, GDNF - glial cell derived neurotrophic factor, PLXNB3 - plexin b3, ESRP2 - epithelial splicing regulatory protein 2, PMCH - pro-melanin-concentrating hormone, GCNT2 - glucosaminyl (n-acetyl) transferase 2, i-branching enzyme (i blood group), PMAIP1 - phorbol-12-myristate-13-acetate-induced protein 1, PNOC - prepronociceptin, PML - promyelocytic leukemia, PLE…
2 - g-protein signaling modulator 2, EFNB2 - ephrin-b2, CCL4L2 - chemokine (c-c motif) ligand 4-like 2, EFNA4 - ephrin-a4, EFNA3 - ephrin-a3, EFNA2 - ephrin-a2, EPHA6 - eph receptor a6, NUAK2 - nuak family, snf1-like kinase, 2, TSPAN1 - tetraspanin 1, SGK2 - serum/glucocorticoid regulated kinase 2, E2F1 - e2f transcription factor 1, E2F2 - e2f transcription factor 2, RASGRP1 - ras guanyl releasin…
GO:0051239	regulation of multicellular organismal process	2.33e-10	2.19e-07	1.25	14437	2126	2998	552	[GFAP - glial fibrillary acidic protein, BMP2K - bmp2 inducible kinase, GFI1 - growth factor independent 1 transcription repressor, KIF20B - kinesin family member 20b, TNFRSF12A - tumor necrosis factor receptor superfamily, member 12a, ABAT - 4-aminobutyrate aminotransferase, SPOCK1 - sparc/osteonectin, cwcv and kazal-like domains proteoglycan (testican) 1, GDNF - glial cell derived neurotrophic …
GO:0002376	immune system process	3.44e-09	3.04e-06	1.3	14437	1378	2998	372	[CD93 - cd93 molecule, EMP2 - epithelial membrane protein 2, LILRB2 - leukocyte immunoglobulin-like receptor, subfamily b (with tm and itim domains), member 2, SPTA1 - spectrin, alpha, erythrocytic 1 (elliptocytosis 2), BNIP3 - bcl2/adenovirus e1b 19kda interacting protein 3, DHX58 - dexh (asp-glu-x-his) box polypeptide 58, BLNK - b-cell linker, CD274 - cd274 molecule, PODXL - podocalyxin-like, S…
GO:0009605	response to external stimulus	3.89e-09	3.23e-06	1.37	14437	954	2998	271	[LILRB2 - leukocyte immunoglobulin-like receptor, subfamily b (with tm and itim domains), member 2, BNIP3 - bcl2/adenovirus e1b 19kda interacting protein 3, GFI1 - growth factor independent 1 transcription repressor, DHX58 - dexh (asp-glu-x-his) box polypeptide 58, PITPNM1 - phosphatidylinositol transfer protein, membrane-associated 1, TRPC3 - transient receptor potential cation channel, subfamil…
GO:0044057	regulation of system process	4.04e-09	3.17e-06	1.62	14437	365	2998	123	[OPRL1 - opiate receptor-like 1, GSTM2 - glutathione s-transferase mu 2 (muscle), EMP2 - epithelial membrane protein 2, ABAT - 4-aminobutyrate aminotransferase, FOXL2 - forkhead box l2, INHBA - inhibin, beta a, TRPC3 - transient receptor potential cation channel, subfamily c, member 3, ACE - angiotensin i converting enzyme, KCNE1L - kcne1-like, HRH1 - histamine receptor h1, TRPC1 - transient rece…
GO:0050896	response to stimulus	6.32e-09	4.7e-06	1.16	14437	3616	2998	873	[GFAP - glial fibrillary acidic protein, GFI1 - growth factor independent 1 transcription repressor, AANAT - aralkylamine n-acetyltransferase, WDR76 - wd repeat domain 76, ABAT - 4-aminobutyrate aminotransferase, GATSL3 - gats protein-like 3, CATSPER2 - cation channel, sperm associated 2, SH2D1B - sh2 domain containing 1b, GCNT1 - glucosaminyl (n-acetyl) transferase 1, core 2, CHAF1B - chromatin …
oprotein), SGK1 - serum/glucocorticoid regulated kinase 1, HIST1H2BJ - histone cluster 1, h2bj, CUTA - cuta divalent cation tolerance homolog (e. coli), DNA2 - dna replication helicase/nuclease 2, TAS1R3 - taste receptor, type 1, member 3, EME1 - essential meiotic structure-specific endonuclease 1, CHRNA6 - cholinergic receptor, nicotinic, alpha 6 (neuronal), FANCM - fanconi anemia, complementati…
GO:0051240	positive regulation of multicellular organismal process	6.76e-09	4.77e-06	1.33	14437	1139	2998	314	[GFAP - glial fibrillary acidic protein, LILRB2 - leukocyte immunoglobulin-like receptor, subfamily b (with tm and itim domains), member 2, DHX58 - dexh (asp-glu-x-his) box polypeptide 58, KIF20B - kinesin family member 20b, TNFRSF12A - tumor necrosis factor receptor superfamily, member 12a, BRCA1 - breast cancer 1, early onset, ABAT - 4-aminobutyrate aminotransferase, CD274 - cd274 molecule, FOX…
GO:0044707	single-multicellular organism process	7.57e-09	5.09e-06	1.25	14437	1837	2998	476	[NPAS4 - neuronal pas domain protein 4, PHF21A - phd finger protein 21a, ABAT - 4-aminobutyrate aminotransferase, CATSPER2 - cation channel, sperm associated 2, GDNF - glial cell derived neurotrophic factor, ESRP2 - epithelial splicing regulatory protein 2, PMCH - pro-melanin-concentrating hormone, LDLR - low density lipoprotein receptor, GCNT2 - glucosaminyl (n-acetyl) transferase 2, i-branching…
GO:0019221	cytokine-mediated signaling pathway	2.18e-08	1.4e-05	1.58	14437	382	2998	125	[IFITM1 - interferon induced transmembrane protein 1, BIRC3 - baculoviral iap repeat containing 3, CIITA - class ii, major histocompatibility complex, transactivator, TNFRSF12A - tumor necrosis factor receptor superfamily, member 12a, CXCL9 - chemokine (c-x-c motif) ligand 9, CARD14 - caspase recruitment domain family, member 14, LIFR - leukemia inhibitory factor receptor alpha, IL11RA - interleu…
GO:0008283	cell proliferation	3.09e-08	1.9e-05	1.47	14437	552	2998	168	[EMP1 - epithelial membrane protein 1, CDC25A - cell division cycle 25a, FAM83D - family with sequence similarity 83, member d, CDK1 - cyclin-dependent kinase 1, MIA - melanoma inhibitory activity, CDC25C - cell division cycle 25c, TCF19 - transcription factor 19, CARD11 - caspase recruitment domain family, member 11, CD70 - cd70 molecule, BST2 - bone marrow stromal cell antigen 2, ACE - angioten…
GO:0043269	regulation of ion transport	3.47e-08	2.04e-05	1.53	14437	431	2998	137	[OPRL1 - opiate receptor-like 1, GSTM2 - glutathione s-transferase mu 2 (muscle), LILRB2 - leukocyte immunoglobulin-like receptor, subfamily b (with tm and itim domains), member 2, GALR2 - galanin receptor 2, PLA2R1 - phospholipase a2 receptor 1, 180kda, CXCL9 - chemokine (c-x-c motif) ligand 9, ABAT - 4-aminobutyrate aminotransferase, CXCL12 - chemokine (c-x-c motif) ligand 12, CATSPER2 - cation…
GO:0050729	positive regulation of inflammatory response	4.35e-08	2.46e-05	2.18	14437	97	2998	44	[TRPV4 - transient receptor potential cation channel, subfamily v, member 4, FFAR2 - free fatty acid receptor 2, CCL3L3 - chemokine (c-c motif) ligand 3-like 3, F12 - coagulation factor xii (hageman factor), FABP4 - fatty acid binding protein 4, adipocyte, ITGA2 - integrin, alpha 2 (cd49b, alpha 2 subunit of vla-2 receptor), IL12B - interleukin 12b (natural killer cell stimulatory factor 2, cytot…
GO:0050877	neurological system process	4.43e-08	2.41e-05	1.48	14437	507	2998	156	[OPRL1 - opiate receptor-like 1, AFF2 - af4/fmr2 family, member 2, GPR155 - g protein-coupled receptor 155, NPAS4 - neuronal pas domain protein 4, GALR2 - galanin receptor 2, GPR52 - g protein-coupled receptor 52, HSF4 - heat shock transcription factor 4, MIP - major intrinsic protein of lens fiber, GNG13 - guanine nucleotide binding protein (g protein), gamma 13, CNTNAP1 - contactin associated p…
GO:0006954	inflammatory response	6.83e-08	3.57e-05	1.57	14437	362	2998	118	[FN1 - fibronectin 1, CXCL9 - chemokine (c-x-c motif) ligand 9, BLNK - b-cell linker, ORM1 - orosomucoid 1, ORM2 - orosomucoid 2, AOX1 - aldehyde oxidase 1, AOAH - acyloxyacyl hydrolase (neutrophil), HRH1 - histamine receptor h1, TLR8 - toll-like receptor 8, IRG1 - immunoresponsive 1 homolog (mouse), P2RX7 - purinergic receptor p2x, ligand-gated ion channel, 7, CCL13 - chemokine (c-c motif) ligan…
GO:0043901	negative regulation of multi-organism process	7.42e-08	3.74e-05	2.1	14437	108	2998	47	[IFITM1 - interferon induced transmembrane protein 1, IFIT1 - interferon-induced protein with tetratricopeptide repeats 1, IFI16 - interferon, gamma-inducible protein 16, OASL - 2'-5'-oligoadenylate synthetase-like, PTX3 - pentraxin 3, long, JUN - jun proto-oncogene, STAT1 - signal transducer and activator of transcription 1, 91kda, TRIM62 - tripartite motif containing 62, CAMP - cathelicidin ant…
GO:0042330	taxis	7.71e-08	3.76e-05	1.69	14437	254	2998	89	[CCL3L3 - chemokine (c-c motif) ligand 3-like 3, SEMA4C - sema domain, immunoglobulin domain (ig), transmembrane domain (tm) and short cytoplasmic domain, (semaphorin) 4c, CMTM1 - cklf-like marvel transmembrane domain containing 1, CXCL9 - chemokine (c-x-c motif) ligand 9, CXCL12 - chemokine (c-x-c motif) ligand 12, SEMA3E - sema domain, immunoglobulin domain (ig), short basic domain, secreted, (…
GO:0097529	myeloid leukocyte migration	1.17e-07	5.5e-05	2.24	14437	84	2998	39	[ITGA9 - integrin, alpha 9, CCL3L3 - chemokine (c-c motif) ligand 3-like 3, SCG2 - secretogranin ii, MITF - microphthalmia-associated transcription factor, ROR2 - receptor tyrosine kinase-like orphan receptor 2, EPX - eosinophil peroxidase, AZU1 - azurocidin 1, PDGFB - platelet-derived growth factor beta polypeptide, HRH1 - histamine receptor h1, LGALS3 - lectin, galactoside-binding, soluble, 3, …
GO:0006935	chemotaxis	1.33e-07	6.06e-05	1.67	14437	253	2998	88	[CCL3L3 - chemokine (c-c motif) ligand 3-like 3, SEMA4C - sema domain, immunoglobulin domain (ig), transmembrane domain (tm) and short cytoplasmic domain, (semaphorin) 4c, CMTM1 - cklf-like marvel transmembrane domain containing 1, CXCL9 - chemokine (c-x-c motif) ligand 9, CXCL12 - chemokine (c-x-c motif) ligand 12, SEMA3E - sema domain, immunoglobulin domain (ig), short basic domain, secreted, (…
GO:0051607	defense response to virus	1.4e-07	6.17e-05	1.96	14437	133	2998	54	[IFITM1 - interferon induced transmembrane protein 1, IFIT2 - interferon-induced protein with tetratricopeptide repeats 2, BNIP3 - bcl2/adenovirus e1b 19kda interacting protein 3, IFIT1 - interferon-induced protein with tetratricopeptide repeats 1, DHX58 - dexh (asp-glu-x-his) box polypeptide 58, IFIT3 - interferon-induced protein with tetratricopeptide repeats 3, IFI16 - interferon, gamma-induci…
GO:0099536	synaptic signaling	1.46e-07	6.25e-05	1.73	14437	217	2998	78	[SYN1 - synapsin i, OPRL1 - opiate receptor-like 1, SLC6A11 - solute carrier family 6 (neurotransmitter transporter), member 11, SLC6A12 - solute carrier family 6 (neurotransmitter transporter), member 12, CHRNG - cholinergic receptor, nicotinic, gamma (muscle), GALR2 - galanin receptor 2, CHRNA7 - cholinergic receptor, nicotinic, alpha 7 (neuronal), GPR52 - g protein-coupled receptor 52, CHRNB2 …
GO:0099537	trans-synaptic signaling	1.46e-07	6.07e-05	1.73	14437	217	2998	78	[SYN1 - synapsin i, OPRL1 - opiate receptor-like 1, SLC6A11 - solute carrier family 6 (neurotransmitter transporter), member 11, SLC6A12 - solute carrier family 6 (neurotransmitter transporter), member 12, CHRNG - cholinergic receptor, nicotinic, gamma (muscle), GALR2 - galanin receptor 2, CHRNA7 - cholinergic receptor, nicotinic, alpha 7 (neuronal), GPR52 - g protein-coupled receptor 52, CHRNB2 …
GO:0009615	response to virus	2.18e-07	8.8e-05	1.74	14437	208	2998	75	[IFITM1 - interferon induced transmembrane protein 1, IFIT2 - interferon-induced protein with tetratricopeptide repeats 2, IFIT1 - interferon-induced protein with tetratricopeptide repeats 1, BNIP3 - bcl2/adenovirus e1b 19kda interacting protein 3, IFIT3 - interferon-induced protein with tetratricopeptide repeats 3, DHX58 - dexh (asp-glu-x-his) box polypeptide 58, IFI16 - interferon, gamma-induci…
GO:0030595	leukocyte chemotaxis	2.4e-07	9.42e-05	2.06	14437	105	2998	45	[CCR5 - chemokine (c-c motif) receptor 5 (gene/pseudogene), FFAR2 - free fatty acid receptor 2, ITGA9 - integrin, alpha 9, CCL3L3 - chemokine (c-c motif) ligand 3-like 3, SCG2 - secretogranin ii, CCR1 - chemokine (c-c motif) receptor 1, AZU1 - azurocidin 1, PDGFB - platelet-derived growth factor beta polypeptide, HRH1 - histamine receptor h1, AMICA1 - adhesion molecule, interacts with cxadr antig…
GO:0030001	metal ion transport	2.42e-07	9.23e-05	1.49	14437	436	2998	135	[SLC4A10 - solute carrier family 4, sodium bicarbonate transporter, member 10, DDIT3 - dna-damage-inducible transcript 3, CATSPER2 - cation channel, sperm associated 2, TTYH1 - tweety homolog 1 (drosophila), SLC34A3 - solute carrier family 34 (type ii sodium/phosphate contransporter), member 3, HEPH - hephaestin, TRPC3 - transient receptor potential cation channel, subfamily c, member 3, SLC9C2 -…
GO:0098916	anterograde trans-synaptic signaling	2.58e-07	9.6e-05	1.72	14437	216	2998	77	[SYN1 - synapsin i, OPRL1 - opiate receptor-like 1, SLC6A11 - solute carrier family 6 (neurotransmitter transporter), member 11, SLC6A12 - solute carrier family 6 (neurotransmitter transporter), member 12, GALR2 - galanin receptor 2, CHRNG - cholinergic receptor, nicotinic, gamma (muscle), CHRNA7 - cholinergic receptor, nicotinic, alpha 7 (neuronal), GPR52 - g protein-coupled receptor 52, CHRNB2 …
GO:0007268	chemical synaptic transmission	2.58e-07	9.35e-05	1.72	14437	216	2998	77	[SYN1 - synapsin i, OPRL1 - opiate receptor-like 1, SLC6A11 - solute carrier family 6 (neurotransmitter transporter), member 11, SLC6A12 - solute carrier family 6 (neurotransmitter transporter), member 12, GALR2 - galanin receptor 2, CHRNG - cholinergic receptor, nicotinic, gamma (muscle), CHRNA7 - cholinergic receptor, nicotinic, alpha 7 (neuronal), GPR52 - g protein-coupled receptor 52, CHRNB2 …
GO:0032103	positive regulation of response to external stimulus	2.96e-07	0.000104	1.72	14437	213	2998	76	[TIAM1 - t-cell lymphoma invasion and metastasis 1, TRPV4 - transient receptor potential cation channel, subfamily v, member 4, CCL3L3 - chemokine (c-c motif) ligand 3-like 3, DHX58 - dexh (asp-glu-x-his) box polypeptide 58, F12 - coagulation factor xii (hageman factor), FABP4 - fatty acid binding protein 4, adipocyte, CXCL9 - chemokine (c-x-c motif) ligand 9, CXCL12 - chemokine (c-x-c motif) lig…
GO:0050909	sensory perception of taste	3.52e-07	0.000121	3.75	14437	18	2998	14	[ASIC1 - acid-sensing (proton-gated) ion channel 1, GNG13 - guanine nucleotide binding protein (g protein), gamma 13, ASIC3 - acid-sensing (proton-gated) ion channel 3, TAS2R4 - taste receptor, type 2, member 4, WNT10B - wingless-type mmtv integration site family, member 10b, PLCB2 - phospholipase c, beta 2, PKD2L1 - polycystic kidney disease 2-like 1, SCNN1D - sodium channel, non-voltage-gated 1…
GO:0070098	chemokine-mediated signaling pathway	4.39e-07	0.000148	2.45	14437	57	2998	29	[CCR5 - chemokine (c-c motif) receptor 5 (gene/pseudogene), CCL3L3 - chemokine (c-c motif) ligand 3-like 3, CMKLR1 - chemokine-like receptor 1, CXCL9 - chemokine (c-x-c motif) ligand 9, CXCL12 - chemokine (c-x-c motif) ligand 12, CCR1 - chemokine (c-c motif) receptor 1, CCR3 - chemokine (c-c motif) receptor 3, CCRL2 - chemokine (c-c motif) receptor-like 2, ACKR4 - atypical chemokine receptor 4, C…
GO:0008284	positive regulation of cell proliferation	4.43e-07	0.000145	1.38	14437	654	2998	188	[CDC6 - cell division cycle 6, GFAP - glial fibrillary acidic protein, EMP2 - epithelial membrane protein 2, LILRB2 - leukocyte immunoglobulin-like receptor, subfamily b (with tm and itim domains), member 2, SPTA1 - spectrin, alpha, erythrocytic 1 (elliptocytosis 2), SASH3 - sam and sh3 domain containing 3, CDC20 - cell division cycle 20, BIRC5 - baculoviral iap repeat containing 5, FN1 - fibrone…
GO:1903522	regulation of blood circulation	5.19e-07	0.000167	1.7	14437	212	2998	75	[FXYD2 - fxyd domain containing ion transport regulator 2, GSTM2 - glutathione s-transferase mu 2 (muscle), ATP2A1 - atpase, ca++ transporting, cardiac muscle, fast twitch 1, NOS2 - nitric oxide synthase 2, inducible, RNF207 - ring finger protein 207, ADRA2C - adrenoceptor alpha 2c, SLC8A1 - solute carrier family 8 (sodium/calcium exchanger), member 1, ATP1A2 - atpase, na+/k+ transporting, alpha …
GO:0007166	cell surface receptor signaling pathway	5.4e-07	0.00017	1.23	14437	1666	2998	424	[GFRA2 - gdnf family receptor alpha 2, TNFRSF12A - tumor necrosis factor receptor superfamily, member 12a, LIFR - leukemia inhibitory factor receptor alpha, PLXNB3 - plexin b3, CARD11 - caspase recruitment domain family, member 11, ESRP2 - epithelial splicing regulatory protein 2, GCNT2 - glucosaminyl (n-acetyl) transferase 2, i-branching enzyme (i blood group), PML - promyelocytic leukemia, BMP8…
GO:0050900	leukocyte migration	6.41e-07	0.000197	1.68	14437	224	2998	78	[CCL3L3 - chemokine (c-c motif) ligand 3-like 3, FN1 - fibronectin 1, CD244 - cd244 molecule, natural killer cell receptor 2b4, MITF - microphthalmia-associated transcription factor, ATP1B1 - atpase, na+/k+ transporting, beta 1 polypeptide, PODXL - podocalyxin-like, CD58 - cd58 molecule, TBX21 - t-box 21, HRH1 - histamine receptor h1, CEACAM6 - carcinoembryonic antigen-related cell adhesion molec…
GO:0032649	regulation of interferon-gamma production	9.63e-07	0.000289	2.19	14437	77	2998	35	[SASH3 - sam and sh3 domain containing 3, FZD5 - frizzled family receptor 5, PGLYRP2 - peptidoglycan recognition protein 2, IL20RB - interleukin 20 receptor beta, CD244 - cd244 molecule, natural killer cell receptor 2b4, IL12B - interleukin 12b (natural killer cell stimulatory factor 2, cytotoxic lymphocyte maturation factor 2, p40), CD274 - cd274 molecule, IL12A - interleukin 12a (natural killer…
GO:0002252	immune effector process	9.84e-07	0.000289	1.51	14437	371	2998	116	[IFITM1 - interferon induced transmembrane protein 1, EMP2 - epithelial membrane protein 2, BNIP3 - bcl2/adenovirus e1b 19kda interacting protein 3, DHX58 - dexh (asp-glu-x-his) box polypeptide 58, CD244 - cd244 molecule, natural killer cell receptor 2b4, CXCL9 - chemokine (c-x-c motif) ligand 9, ITFG2 - integrin alpha fg-gap repeat containing 2, IL12B - interleukin 12b (natural killer cell stimu…
GO:0042127	regulation of cell proliferation	1.02e-06	0.000295	1.26	14437	1212	2998	318	[TOB1 - transducer of erbb2, 1, GFAP - glial fibrillary acidic protein, EMP2 - epithelial membrane protein 2, LILRB2 - leukocyte immunoglobulin-like receptor, subfamily b (with tm and itim domains), member 2, SPTA1 - spectrin, alpha, erythrocytic 1 (elliptocytosis 2), SIX5 - six homeobox 5, HSF4 - heat shock transcription factor 4, EMP3 - epithelial membrane protein 3, TRIM24 - tripartite motif c…
GO:0050727	regulation of inflammatory response	1.2e-06	0.000338	1.63	14437	242	2998	82	[TRPV4 - transient receptor potential cation channel, subfamily v, member 4, CCL3L3 - chemokine (c-c motif) ligand 3-like 3, BIRC3 - baculoviral iap repeat containing 3, NOS2 - nitric oxide synthase 2, inducible, F12 - coagulation factor xii (hageman factor), FABP4 - fatty acid binding protein 4, adipocyte, IL12B - interleukin 12b (natural killer cell stimulatory factor 2, cytotoxic lymphocyte ma…
GO:0007187	G-protein coupled receptor signaling pathway, coupled to cyclic nucleotide second messenger	1.29e-06	0.000359	1.98	14437	107	2998	44	[GRK5 - g protein-coupled receptor kinase 5, OPRL1 - opiate receptor-like 1, GALR2 - galanin receptor 2, GPR52 - g protein-coupled receptor 52, ADRA2C - adrenoceptor alpha 2c, GALR1 - galanin receptor 1, CHRM3 - cholinergic receptor, muscarinic 3, CHRM4 - cholinergic receptor, muscarinic 4, CCR1 - chemokine (c-c motif) receptor 1, CCR3 - chemokine (c-c motif) receptor 3, CORT - cortistatin, HTR2C…
GO:0032101	regulation of response to external stimulus	1.49e-06	0.000406	1.4	14437	550	2998	160	[PHLDB2 - pleckstrin homology-like domain, family b, member 2, DHX58 - dexh (asp-glu-x-his) box polypeptide 58, BIRC3 - baculoviral iap repeat containing 3, TRIM24 - tripartite motif containing 24, SEMA4C - sema domain, immunoglobulin domain (ig), transmembrane domain (tm) and short cytoplasmic domain, (semaphorin) 4c, CXCL9 - chemokine (c-x-c motif) ligand 9, ABAT - 4-aminobutyrate aminotransfer…
GO:0007586	digestion	1.57e-06	0.000419	2.99	14437	29	2998	18	[CEL - carboxyl ester lipase, GALR2 - galanin receptor 2, CTSE - cathepsin e, AMY2B - amylase, alpha 2b (pancreatic), MEP1A - meprin a, alpha (paba peptide hydrolase), CTRL - chymotrypsin-like, PYY - peptide yy, GALR1 - galanin receptor 1, LIPG - lipase, endothelial, CCKBR - cholecystokinin b receptor, LIPC - lipase, hepatic, PPARGC1A - peroxisome proliferator-activated receptor gamma, coactivato…
GO:0051046	regulation of secretion	1.96e-06	0.000513	1.4	14437	536	2998	156	[OPRL1 - opiate receptor-like 1, FN1 - fibronectin 1, PLA2R1 - phospholipase a2 receptor 1, 180kda, CD244 - cd244 molecule, natural killer cell receptor 2b4, ABAT - 4-aminobutyrate aminotransferase, CXCL12 - chemokine (c-x-c motif) ligand 12, GDNF - glial cell derived neurotrophic factor, CD274 - cd274 molecule, FOXL2 - forkhead box l2, SDC4 - syndecan 4, INHBA - inhibin, beta a, CD58 - cd58 mole…
GO:0071310	cellular response to organic substance	2.6e-06	0.000667	1.3	14437	876	2998	237	[RGS19 - regulator of g-protein signaling 19, LILRB2 - leukocyte immunoglobulin-like receptor, subfamily b (with tm and itim domains), member 2, GFI1 - growth factor independent 1 transcription repressor, NPAS4 - neuronal pas domain protein 4, AANAT - aralkylamine n-acetyltransferase, BRCA1 - breast cancer 1, early onset, GATSL3 - gats protein-like 3, LDLR - low density lipoprotein receptor, PML …
GO:0010033	response to organic substance	3.16e-06	0.000796	1.23	14437	1458	2998	371	[RGS19 - regulator of g-protein signaling 19, LILRB2 - leukocyte immunoglobulin-like receptor, subfamily b (with tm and itim domains), member 2, GFI1 - growth factor independent 1 transcription repressor, NPAS4 - neuronal pas domain protein 4, PAQR9 - progestin and adipoq receptor family member ix, AANAT - aralkylamine n-acetyltransferase, BRCA1 - breast cancer 1, early onset, ABAT - 4-aminobutyr…
GO:0010959	regulation of metal ion transport	3.23e-06	0.0008	1.59	14437	255	2998	84	[FXYD2 - fxyd domain containing ion transport regulator 2, GSTM2 - glutathione s-transferase mu 2 (muscle), OPRL1 - opiate receptor-like 1, LILRB2 - leukocyte immunoglobulin-like receptor, subfamily b (with tm and itim domains), member 2, GALR2 - galanin receptor 2, RNF207 - ring finger protein 207, WNK4 - wnk lysine deficient protein kinase 4, ATP1A2 - atpase, na+/k+ transporting, alpha 2 polype…
GO:0048856	anatomical structure development	3.7e-06	0.000901	1.16	14437	2439	2998	590	[GFAP - glial fibrillary acidic protein, LHB - luteinizing hormone beta polypeptide, MDGA1 - mam domain containing glycosylphosphatidylinositol anchor 1, SPTA1 - spectrin, alpha, erythrocytic 1 (elliptocytosis 2), GFRA2 - gdnf family receptor alpha 2, PITPNM1 - phosphatidylinositol transfer protein, membrane-associated 1, ABAT - 4-aminobutyrate aminotransferase, SPOCK1 - sparc/osteonectin, cwcv a…
GO:0060326	cell chemotaxis	3.84e-06	0.00092	1.78	14437	149	2998	55	[CCL3L3 - chemokine (c-c motif) ligand 3-like 3, CXCL9 - chemokine (c-x-c motif) ligand 9, CXCL12 - chemokine (c-x-c motif) ligand 12, PLXNB3 - plexin b3, HRH1 - histamine receptor h1, LGALS3 - lectin, galactoside-binding, soluble, 3, AMICA1 - adhesion molecule, interacts with cxadr antigen 1, CHGA - chromogranin a (parathyroid secretory protein 1), SLAMF1 - signaling lymphocytic activation molec…
GO:0071674	mononuclear cell migration	3.99e-06	0.000938	2.77	14437	33	2998	19	[S100A12 - s100 calcium binding protein a12, CCL3L3 - chemokine (c-c motif) ligand 3-like 3, CCL13 - chemokine (c-c motif) ligand 13, CCL15 - chemokine (c-c motif) ligand 15, CCL5 - chemokine (c-c motif) ligand 5, CCL8 - chemokine (c-c motif) ligand 8, CCL7 - chemokine (c-c motif) ligand 7, CCL2 - chemokine (c-c motif) ligand 2, CCL3L1 - chemokine (c-c motif) ligand 3-like 1, CCL3 - chemokine (c-…
GO:0060337	type I interferon signaling pathway	4.09e-06	0.000948	2.41	14437	50	2998	25	[IFITM1 - interferon induced transmembrane protein 1, IFIT2 - interferon-induced protein with tetratricopeptide repeats 2, IFIT1 - interferon-induced protein with tetratricopeptide repeats 1, IFIT3 - interferon-induced protein with tetratricopeptide repeats 3, HLA-G - major histocompatibility complex, class i, g, IRF9 - interferon regulatory factor 9, OASL - 2'-5'-oligoadenylate synthetase-like, …
GO:0034097	response to cytokine	4.1e-06	0.000933	1.51	14437	318	2998	100	[IFITM1 - interferon induced transmembrane protein 1, CIITA - class ii, major histocompatibility complex, transactivator, AANAT - aralkylamine n-acetyltransferase, BRCA1 - breast cancer 1, early onset, LIFR - leukemia inhibitory factor receptor alpha, CD274 - cd274 molecule, IL12B - interleukin 12b (natural killer cell stimulatory factor 2, cytotoxic lymphocyte maturation factor 2, p40), BST2 - b…
GO:0051924	regulation of calcium ion transport	4.1e-06	0.00092	1.75	14437	160	2998	58	[GSTM2 - glutathione s-transferase mu 2 (muscle), OPRL1 - opiate receptor-like 1, LILRB2 - leukocyte immunoglobulin-like receptor, subfamily b (with tm and itim domains), member 2, CXCL9 - chemokine (c-x-c motif) ligand 9, ATP1A2 - atpase, na+/k+ transporting, alpha 2 polypeptide, SLC8A1 - solute carrier family 8 (sodium/calcium exchanger), member 1, CXCL12 - chemokine (c-x-c motif) ligand 12, CA…
GO:0051272	positive regulation of cellular component movement	4.56e-06	0.00101	1.48	14437	354	2998	109	[FN1 - fibronectin 1, KIF20B - kinesin family member 20b, SEMA4C - sema domain, immunoglobulin domain (ig), transmembrane domain (tm) and short cytoplasmic domain, (semaphorin) 4c, FLT4 - fms-related tyrosine kinase 4, CXCL9 - chemokine (c-x-c motif) ligand 9, CXCL12 - chemokine (c-x-c motif) ligand 12, CD274 - cd274 molecule, IL12A - interleukin 12a (natural killer cell stimulatory factor 1, cyt…
GO:0045087	innate immune response	4.84e-06	0.00105	1.51	14437	323	2998	101	[DHX58 - dexh (asp-glu-x-his) box polypeptide 58, CD244 - cd244 molecule, natural killer cell receptor 2b4, SH2D1B - sh2 domain containing 1b, BST2 - bone marrow stromal cell antigen 2, TMEM173 - transmembrane protein 173, PML - promyelocytic leukemia, TLR8 - toll-like receptor 8, LGALS3 - lectin, galactoside-binding, soluble, 3, CD300LB - cd300 molecule-like family member b, IRGM - immunity-rela…
GO:0010562	positive regulation of phosphorus metabolic process	5.2e-06	0.00111	1.3	14437	837	2998	226	[EMP2 - epithelial membrane protein 2, GFRA2 - gdnf family receptor alpha 2, SEMA4C - sema domain, immunoglobulin domain (ig), transmembrane domain (tm) and short cytoplasmic domain, (semaphorin) 4c, CARD14 - caspase recruitment domain family, member 14, PROK1 - prokineticin 1, GCNT2 - glucosaminyl (n-acetyl) transferase 2, i-branching enzyme (i blood group), HRH1 - histamine receptor h1, FGF18 -…
GO:0045937	positive regulation of phosphate metabolic process	5.2e-06	0.0011	1.3	14437	837	2998	226	[EMP2 - epithelial membrane protein 2, GFRA2 - gdnf family receptor alpha 2, SEMA4C - sema domain, immunoglobulin domain (ig), transmembrane domain (tm) and short cytoplasmic domain, (semaphorin) 4c, CARD14 - caspase recruitment domain family, member 14, PROK1 - prokineticin 1, GCNT2 - glucosaminyl (n-acetyl) transferase 2, i-branching enzyme (i blood group), HRH1 - histamine receptor h1, FGF18 -…
GO:0034765	regulation of ion transmembrane transport	5.51e-06	0.00115	1.54	14437	285	2998	91	[FXYD2 - fxyd domain containing ion transport regulator 2, KCNH4 - potassium voltage-gated channel, subfamily h (eag-related), member 4, KCNK5 - potassium channel, subfamily k, member 5, OPRL1 - opiate receptor-like 1, GSTM2 - glutathione s-transferase mu 2 (muscle), GALR2 - galanin receptor 2, RNF207 - ring finger protein 207, WNK4 - wnk lysine deficient protein kinase 4, NLGN2 - neuroligin 2, A…
GO:0040011	locomotion	5.78e-06	0.00118	1.31	14437	762	2998	208	[MDGA1 - mam domain containing glycosylphosphatidylinositol anchor 1, EMP2 - epithelial membrane protein 2, FAM83D - family with sequence similarity 83, member d, SEMA4C - sema domain, immunoglobulin domain (ig), transmembrane domain (tm) and short cytoplasmic domain, (semaphorin) 4c, SPOCK1 - sparc/osteonectin, cwcv and kazal-like domains proteoglycan (testican) 1, CATSPER2 - cation channel, spe…
GO:0030335	positive regulation of cell migration	5.81e-06	0.00117	1.49	14437	336	2998	104	[FN1 - fibronectin 1, KIF20B - kinesin family member 20b, SEMA4C - sema domain, immunoglobulin domain (ig), transmembrane domain (tm) and short cytoplasmic domain, (semaphorin) 4c, FLT4 - fms-related tyrosine kinase 4, CXCL9 - chemokine (c-x-c motif) ligand 9, CXCL12 - chemokine (c-x-c motif) ligand 12, CD274 - cd274 molecule, IL12A - interleukin 12a (natural killer cell stimulatory factor 1, cyt…
GO:0071621	granulocyte chemotaxis	6.33e-06	0.00126	2.28	14437	57	2998	27	[ITGA9 - integrin, alpha 9, CCL3L3 - chemokine (c-c motif) ligand 3-like 3, SCG2 - secretogranin ii, HRH1 - histamine receptor h1, AMICA1 - adhesion molecule, interacts with cxadr antigen 1, LGALS3 - lectin, galactoside-binding, soluble, 3, CCL4L2 - chemokine (c-c motif) ligand 4-like 2, S100A12 - s100 calcium binding protein a12, CCL13 - chemokine (c-c motif) ligand 13, TGFB2 - transforming grow…
GO:0030593	neutrophil chemotaxis	6.45e-06	0.00127	2.36	14437	51	2998	25	[ITGA9 - integrin, alpha 9, CCL3L3 - chemokine (c-c motif) ligand 3-like 3, AMICA1 - adhesion molecule, interacts with cxadr antigen 1, LGALS3 - lectin, galactoside-binding, soluble, 3, CCL4L2 - chemokine (c-c motif) ligand 4-like 2, S100A12 - s100 calcium binding protein a12, CCL13 - chemokine (c-c motif) ligand 13, TGFB2 - transforming growth factor, beta 2, CCL15 - chemokine (c-c motif) ligand…
GO:0040012	regulation of locomotion	6.61e-06	0.00128	1.33	14437	671	2998	186	[IFITM1 - interferon induced transmembrane protein 1, EMP2 - epithelial membrane protein 2, PHLDB2 - pleckstrin homology-like domain, family b, member 2, FN1 - fibronectin 1, KIF20B - kinesin family member 20b, SEMA4C - sema domain, immunoglobulin domain (ig), transmembrane domain (tm) and short cytoplasmic domain, (semaphorin) 4c, FLT4 - fms-related tyrosine kinase 4, CXCL9 - chemokine (c-x-c mo…
GO:0098660	inorganic ion transmembrane transport	8.12e-06	0.00155	1.43	14437	410	2998	122	[SLC4A10 - solute carrier family 4, sodium bicarbonate transporter, member 10, DDIT3 - dna-damage-inducible transcript 3, CATSPER2 - cation channel, sperm associated 2, SLC34A3 - solute carrier family 34 (type ii sodium/phosphate contransporter), member 3, TTYH1 - tweety homolog 1 (drosophila), ANO8 - anoctamin 8, TRPC3 - transient receptor potential cation channel, subfamily c, member 3, SLC9C2 …
GO:0051270	regulation of cellular component movement	8.21e-06	0.00155	1.33	14437	669	2998	185	[IFITM1 - interferon induced transmembrane protein 1, EMP2 - epithelial membrane protein 2, PHLDB2 - pleckstrin homology-like domain, family b, member 2, FN1 - fibronectin 1, KIF20B - kinesin family member 20b, SEMA4C - sema domain, immunoglobulin domain (ig), transmembrane domain (tm) and short cytoplasmic domain, (semaphorin) 4c, FLT4 - fms-related tyrosine kinase 4, CXCL9 - chemokine (c-x-c mo…
GO:0034341	response to interferon-gamma	8.22e-06	0.00153	2.16	14437	67	2998	30	[IFITM1 - interferon induced transmembrane protein 1, CCL3L3 - chemokine (c-c motif) ligand 3-like 3, STAR - steroidogenic acute regulatory protein, NOS2 - nitric oxide synthase 2, inducible, CIITA - class ii, major histocompatibility complex, transactivator, ADAMTS13 - adam metallopeptidase with thrombospondin type 1 motif, 13, IL12B - interleukin 12b (natural killer cell stimulatory factor 2, c…
GO:0050707	regulation of cytokine secretion	8.32e-06	0.00153	1.85	14437	117	2998	45	[TRPV4 - transient receptor potential cation channel, subfamily v, member 4, FFAR2 - free fatty acid receptor 2, FN1 - fibronectin 1, CD244 - cd244 molecule, natural killer cell receptor 2b4, IL1R2 - interleukin 1 receptor, type ii, SOCS1 - suppressor of cytokine signaling 1, CD274 - cd274 molecule, TNFRSF21 - tumor necrosis factor receptor superfamily, member 21, RGCC - regulator of cell cycle, …
GO:0071346	cellular response to interferon-gamma	9.9e-06	0.00179	2.41	14437	46	2998	23	[CCL3L3 - chemokine (c-c motif) ligand 3-like 3, CCL13 - chemokine (c-c motif) ligand 13, CCL15 - chemokine (c-c motif) ligand 15, STAR - steroidogenic acute regulatory protein, NOS2 - nitric oxide synthase 2, inducible, CCL5 - chemokine (c-c motif) ligand 5, HLA-DPA1 - major histocompatibility complex, class ii, dp alpha 1, CCL8 - chemokine (c-c motif) ligand 8, CCL7 - chemokine (c-c motif) liga…
GO:0002548	monocyte chemotaxis	1.12e-05	0.00201	2.71	14437	32	2998	18	[S100A12 - s100 calcium binding protein a12, CCL3L3 - chemokine (c-c motif) ligand 3-like 3, CCL13 - chemokine (c-c motif) ligand 13, CCL15 - chemokine (c-c motif) ligand 15, CCL5 - chemokine (c-c motif) ligand 5, CCL8 - chemokine (c-c motif) ligand 8, CCL7 - chemokine (c-c motif) ligand 7, CCL2 - chemokine (c-c motif) ligand 2, CCL3L1 - chemokine (c-c motif) ligand 3-like 1, PDGFB - platelet-der…
GO:0030799	regulation of cyclic nucleotide metabolic process	1.15e-05	0.00203	1.91	14437	101	2998	40	[OPRL1 - opiate receptor-like 1, GALR2 - galanin receptor 2, LTB4R2 - leukotriene b4 receptor 2, NOS2 - nitric oxide synthase 2, inducible, MRAP2 - melanocortin 2 receptor accessory protein 2, CXCL9 - chemokine (c-x-c motif) ligand 9, GALR1 - galanin receptor 1, AVPR2 - arginine vasopressin receptor 2, ADCY6 - adenylate cyclase 6, HTR1B - 5-hydroxytryptamine (serotonin) receptor 1b, g protein-cou…
GO:2000147	positive regulation of cell motility	1.19e-05	0.00207	1.47	14437	345	2998	105	[FN1 - fibronectin 1, KIF20B - kinesin family member 20b, SEMA4C - sema domain, immunoglobulin domain (ig), transmembrane domain (tm) and short cytoplasmic domain, (semaphorin) 4c, FLT4 - fms-related tyrosine kinase 4, CXCL9 - chemokine (c-x-c motif) ligand 9, CXCL12 - chemokine (c-x-c motif) ligand 12, CD274 - cd274 molecule, IL12A - interleukin 12a (natural killer cell stimulatory factor 1, cyt…
GO:0060333	interferon-gamma-mediated signaling pathway	1.26e-05	0.00217	2.15	14437	65	2998	29	[HLA-G - major histocompatibility complex, class i, g, IRF9 - interferon regulatory factor 9, HLA-F - major histocompatibility complex, class i, f, OASL - 2'-5'-oligoadenylate synthetase-like, CIITA - class ii, major histocompatibility complex, transactivator, TRIM34 - tripartite motif containing 34, STAT1 - signal transducer and activator of transcription 1, 91kda, TRIM62 - tripartite motif cont…
GO:0071805	potassium ion transmembrane transport	1.29e-05	0.00219	1.92	14437	98	2998	39	[KCNH4 - potassium voltage-gated channel, subfamily h (eag-related), member 4, FXYD2 - fxyd domain containing ion transport regulator 2, KCNK5 - potassium channel, subfamily k, member 5, KCNG3 - potassium voltage-gated channel, subfamily g, member 3, CNGA1 - cyclic nucleotide gated channel alpha 1, KCNQ5 - potassium voltage-gated channel, kqt-like subfamily, member 5, KCNA2 - potassium voltage-ga…
GO:0071804	cellular potassium ion transport	1.29e-05	0.00216	1.92	14437	98	2998	39	[KCNH4 - potassium voltage-gated channel, subfamily h (eag-related), member 4, FXYD2 - fxyd domain containing ion transport regulator 2, KCNK5 - potassium channel, subfamily k, member 5, KCNG3 - potassium voltage-gated channel, subfamily g, member 3, CNGA1 - cyclic nucleotide gated channel alpha 1, KCNQ5 - potassium voltage-gated channel, kqt-like subfamily, member 5, KCNA2 - potassium voltage-ga…
GO:1903530	regulation of secretion by cell	1.3e-05	0.00216	1.38	14437	491	2998	141	[FN1 - fibronectin 1, CD244 - cd244 molecule, natural killer cell receptor 2b4, ABAT - 4-aminobutyrate aminotransferase, CXCL12 - chemokine (c-x-c motif) ligand 12, GDNF - glial cell derived neurotrophic factor, CD274 - cd274 molecule, FOXL2 - forkhead box l2, SDC4 - syndecan 4, INHBA - inhibin, beta a, CD58 - cd58 molecule, PML - promyelocytic leukemia, RABGEF1 - rab guanine nucleotide exchange …
GO:0006928	movement of cell or subcellular component	1.33e-05	0.00219	1.25	14437	1037	2998	270	[EMP2 - epithelial membrane protein 2, MDGA1 - mam domain containing glycosylphosphatidylinositol anchor 1, FAM83D - family with sequence similarity 83, member d, SPTA1 - spectrin, alpha, erythrocytic 1 (elliptocytosis 2), KIF20B - kinesin family member 20b, SEMA4C - sema domain, immunoglobulin domain (ig), transmembrane domain (tm) and short cytoplasmic domain, (semaphorin) 4c, CATSPER2 - cation…
GO:0097530	granulocyte migration	1.34e-05	0.00217	2.17	14437	62	2998	28	[ITGA9 - integrin, alpha 9, CCL3L3 - chemokine (c-c motif) ligand 3-like 3, SCG2 - secretogranin ii, EPX - eosinophil peroxidase, HRH1 - histamine receptor h1, AMICA1 - adhesion molecule, interacts with cxadr antigen 1, LGALS3 - lectin, galactoside-binding, soluble, 3, CCL4L2 - chemokine (c-c motif) ligand 4-like 2, S100A12 - s100 calcium binding protein a12, CCL13 - chemokine (c-c motif) ligand …
GO:0050920	regulation of chemotaxis	1.36e-05	0.00219	1.72	14437	151	2998	54	[TIAM1 - t-cell lymphoma invasion and metastasis 1, TRPV4 - transient receptor potential cation channel, subfamily v, member 4, SEMA4C - sema domain, immunoglobulin domain (ig), transmembrane domain (tm) and short cytoplasmic domain, (semaphorin) 4c, CXCL9 - chemokine (c-x-c motif) ligand 9, CXCL12 - chemokine (c-x-c motif) ligand 12, SEMA3E - sema domain, immunoglobulin domain (ig), short basic …
GO:0007193	adenylate cyclase-inhibiting G-protein coupled receptor signaling pathway	1.55e-05	0.00246	2.31	14437	50	2998	24	[OPRL1 - opiate receptor-like 1, GABBR1 - gamma-aminobutyric acid (gaba) b receptor, 1, GNAZ - guanine nucleotide binding protein (g protein), alpha z polypeptide, NPR3 - natriuretic peptide receptor c/guanylate cyclase c (atrionatriuretic peptide receptor c), CHRM3 - cholinergic receptor, muscarinic 3, CHRM4 - cholinergic receptor, muscarinic 4, GNAL - guanine nucleotide binding protein (g prote…
GO:0006813	potassium ion transport	1.56e-05	0.00245	1.86	14437	109	2998	42	[KCNG3 - potassium voltage-gated channel, subfamily g, member 3, KCNK5 - potassium channel, subfamily k, member 5, FXYD2 - fxyd domain containing ion transport regulator 2, KCNH4 - potassium voltage-gated channel, subfamily h (eag-related), member 4, KCNA2 - potassium voltage-gated channel, shaker-related subfamily, member 2, KCNQ5 - potassium voltage-gated channel, kqt-like subfamily, member 5, …
GO:0007600	sensory perception	1.58e-05	0.00245	1.51	14437	284	2998	89	[OPRL1 - opiate receptor-like 1, TIMP3 - timp metallopeptidase inhibitor 3, PCDH15 - protocadherin-related 15, HSF4 - heat shock transcription factor 4, CHRNB2 - cholinergic receptor, nicotinic, beta 2 (neuronal), TJP1 - tight junction protein 1, NLGN2 - neuroligin 2, GRK7 - g protein-coupled receptor kinase 7, GNG13 - guanine nucleotide binding protein (g protein), gamma 13, MIP - major intrinsi…
GO:0051241	negative regulation of multicellular organismal process	1.61e-05	0.00248	1.29	14437	786	2998	211	[GFAP - glial fibrillary acidic protein, TOB1 - transducer of erbb2, 1, GFI1 - growth factor independent 1 transcription repressor, DHX58 - dexh (asp-glu-x-his) box polypeptide 58, SEMA4C - sema domain, immunoglobulin domain (ig), transmembrane domain (tm) and short cytoplasmic domain, (semaphorin) 4c, ABAT - 4-aminobutyrate aminotransferase, SPOCK1 - sparc/osteonectin, cwcv and kazal-like domain…
GO:0043410	positive regulation of MAPK cascade	1.77e-05	0.00268	1.42	14437	396	2998	117	[CDK1 - cyclin-dependent kinase 1, GPR55 - g protein-coupled receptor 55, SEMA4C - sema domain, immunoglobulin domain (ig), transmembrane domain (tm) and short cytoplasmic domain, (semaphorin) 4c, FLT4 - fms-related tyrosine kinase 4, MID1 - midline 1 (opitz/bbb syndrome), PROK1 - prokineticin 1, MAP3K9 - mitogen-activated protein kinase kinase kinase 9, GCNT2 - glucosaminyl (n-acetyl) transferas…
GO:0001501	skeletal system development	1.78e-05	0.00267	1.81	14437	120	2998	45	[HOXA13 - homeobox a13, HOXA11 - homeobox a11, PAPSS2 - 3'-phosphoadenosine 5'-phosphosulfate synthase 2, CMKLR1 - chemokine-like receptor 1, FGFR3 - fibroblast growth factor receptor 3, DLX1 - distal-less homeobox 1, ACVR2A - activin a receptor, type iia, SHOX2 - short stature homeobox 2, DLL3 - delta-like 3 (drosophila), WFIKKN1 - wap, follistatin/kazal, immunoglobulin, kunitz and netrin domain…
GO:0030334	regulation of cell migration	1.84e-05	0.00273	1.34	14437	581	2998	162	[IFITM1 - interferon induced transmembrane protein 1, EMP2 - epithelial membrane protein 2, PHLDB2 - pleckstrin homology-like domain, family b, member 2, FN1 - fibronectin 1, KIF20B - kinesin family member 20b, SEMA4C - sema domain, immunoglobulin domain (ig), transmembrane domain (tm) and short cytoplasmic domain, (semaphorin) 4c, FLT4 - fms-related tyrosine kinase 4, CXCL9 - chemokine (c-x-c mo…
GO:2000145	regulation of cell motility	1.88e-05	0.00277	1.33	14437	623	2998	172	[IFITM1 - interferon induced transmembrane protein 1, EMP2 - epithelial membrane protein 2, PHLDB2 - pleckstrin homology-like domain, family b, member 2, FN1 - fibronectin 1, KIF20B - kinesin family member 20b, SEMA4C - sema domain, immunoglobulin domain (ig), transmembrane domain (tm) and short cytoplasmic domain, (semaphorin) 4c, FLT4 - fms-related tyrosine kinase 4, CXCL9 - chemokine (c-x-c mo…
GO:0034762	regulation of transmembrane transport	1.9e-05	0.00277	1.49	14437	297	2998	92	[FXYD2 - fxyd domain containing ion transport regulator 2, KCNH4 - potassium voltage-gated channel, subfamily h (eag-related), member 4, KCNK5 - potassium channel, subfamily k, member 5, GSTM2 - glutathione s-transferase mu 2 (muscle), OPRL1 - opiate receptor-like 1, GALR2 - galanin receptor 2, RNF207 - ring finger protein 207, WNK4 - wnk lysine deficient protein kinase 4, NLGN2 - neuroligin 2, A…
GO:0007188	adenylate cyclase-modulating G-protein coupled receptor signaling pathway	1.91e-05	0.00275	1.91	14437	96	2998	38	[OPRL1 - opiate receptor-like 1, GRK5 - g protein-coupled receptor kinase 5, GALR2 - galanin receptor 2, GPR52 - g protein-coupled receptor 52, ADRA2C - adrenoceptor alpha 2c, CHRM3 - cholinergic receptor, muscarinic 3, GALR1 - galanin receptor 1, CHRM4 - cholinergic receptor, muscarinic 4, CORT - cortistatin, CCR3 - chemokine (c-c motif) receptor 3, HTR2C - 5-hydroxytryptamine (serotonin) recept…
GO:0098655	cation transmembrane transport	1.99e-05	0.00284	1.42	14437	401	2998	118	[FAM26E - family with sequence similarity 26, member e, SLC4A10 - solute carrier family 4, sodium bicarbonate transporter, member 10, DDIT3 - dna-damage-inducible transcript 3, CATSPER2 - cation channel, sperm associated 2, TTYH1 - tweety homolog 1 (drosophila), SLC34A3 - solute carrier family 34 (type ii sodium/phosphate contransporter), member 3, TRPC3 - transient receptor potential cation chan…
GO:0032689	negative regulation of interferon-gamma production	2.14e-05	0.00303	2.89	14437	25	2998	15	[SLAMF1 - signaling lymphocytic activation molecule family member 1, IL20RB - interleukin 20 receptor beta, PGLYRP2 - peptidoglycan recognition protein 2, GATA3 - gata binding protein 3, IL33 - interleukin 33, IL1RL1 - interleukin 1 receptor-like 1, CD274 - cd274 molecule, HAVCR2 - hepatitis a virus cellular receptor 2, CD96 - cd96 molecule, INHBA - inhibin, beta a, IL10 - interleukin 10, AXL - a…
GO:0070372	regulation of ERK1 and ERK2 cascade	2.3e-05	0.00322	1.61	14437	198	2998	66	[TIAM1 - t-cell lymphoma invasion and metastasis 1, TRPV4 - transient receptor potential cation channel, subfamily v, member 4, FAM83D - family with sequence similarity 83, member d, CCL3L3 - chemokine (c-c motif) ligand 3-like 3, TIMP3 - timp metallopeptidase inhibitor 3, FN1 - fibronectin 1, GPR55 - g protein-coupled receptor 55, PTPRR - protein tyrosine phosphatase, receptor type, r, FLT4 - fm…
GO:0007606	sensory perception of chemical stimulus	2.43e-05	0.00336	2.35	14437	45	2998	22	[SLC24A4 - solute carrier family 24 (sodium/potassium/calcium exchanger), member 4, ASIC1 - acid-sensing (proton-gated) ion channel 1, CNGA4 - cyclic nucleotide gated channel alpha 4, GNG13 - guanine nucleotide binding protein (g protein), gamma 13, ASIC3 - acid-sensing (proton-gated) ion channel 3, OR2B6 - olfactory receptor, family 2, subfamily b, member 6, GNAL - guanine nucleotide binding pro…
GO:0072677	eosinophil migration	2.52e-05	0.00346	4.28	14437	9	2998	8	[SCG2 - secretogranin ii, CCL13 - chemokine (c-c motif) ligand 13, CCL5 - chemokine (c-c motif) ligand 5, HRH1 - histamine receptor h1, LGALS3 - lectin, galactoside-binding, soluble, 3, CCL7 - chemokine (c-c motif) ligand 7, EPX - eosinophil peroxidase, CCL3 - chemokine (c-c motif) ligand 3]
GO:1905517	macrophage migration	2.59e-05	0.00352	3.94	14437	11	2998	9	[SFTPD - surfactant protein d, EDNRB - endothelin receptor type b, CKLF - chemokine-like factor, CCL5 - chemokine (c-c motif) ligand 5, LGALS3 - lectin, galactoside-binding, soluble, 3, ROR2 - receptor tyrosine kinase-like orphan receptor 2, CCL2 - chemokine (c-c motif) ligand 2, AZU1 - azurocidin 1, CCL3 - chemokine (c-c motif) ligand 3]
GO:0040017	positive regulation of locomotion	2.65e-05	0.00356	1.43	14437	367	2998	109	[FN1 - fibronectin 1, KIF20B - kinesin family member 20b, SEMA4C - sema domain, immunoglobulin domain (ig), transmembrane domain (tm) and short cytoplasmic domain, (semaphorin) 4c, FLT4 - fms-related tyrosine kinase 4, CXCL9 - chemokine (c-x-c motif) ligand 9, CXCL12 - chemokine (c-x-c motif) ligand 12, CD274 - cd274 molecule, IL12A - interleukin 12a (natural killer cell stimulatory factor 1, cyt…
GO:0050804	modulation of synaptic transmission	2.76e-05	0.00368	1.57	14437	218	2998	71	[SYN1 - synapsin i, GFAP - glial fibrillary acidic protein, GRID2IP - glutamate receptor, ionotropic, delta 2 (grid2) interacting protein, NPAS4 - neuronal pas domain protein 4, CDC20 - cell division cycle 20, CHRNB2 - cholinergic receptor, nicotinic, beta 2 (neuronal), SLC6A4 - solute carrier family 6 (neurotransmitter transporter), member 4, NLGN2 - neuroligin 2, CHRNA3 - cholinergic receptor, …
GO:0007610	behavior	3.01e-05	0.00397	1.43	14437	368	2998	109	[OPRL1 - opiate receptor-like 1, SLC4A10 - solute carrier family 4, sodium bicarbonate transporter, member 10, AFF2 - af4/fmr2 family, member 2, NPAS4 - neuronal pas domain protein 4, GALR2 - galanin receptor 2, GPR52 - g protein-coupled receptor 52, PAX5 - paired box 5, ABAT - 4-aminobutyrate aminotransferase, CXCL12 - chemokine (c-x-c motif) ligand 12, GDNF - glial cell derived neurotrophic fac…
GO:0050433	regulation of catecholamine secretion	3.09e-05	0.00404	2.64	14437	31	2998	17	[KCNA2 - potassium voltage-gated channel, shaker-related subfamily, member 2, PINK1 - pten induced putative kinase 1, CHRNB2 - cholinergic receptor, nicotinic, beta 2 (neuronal), ADRA2C - adrenoceptor alpha 2c, ABAT - 4-aminobutyrate aminotransferase, CXCL12 - chemokine (c-x-c motif) ligand 12, GDNF - glial cell derived neurotrophic factor, SYT4 - synaptotagmin iv, ADORA2A - adenosine a2a recepto…
GO:0042742	defense response to bacterium	3.19e-05	0.00413	1.76	14437	126	2998	46	[CLEC4D - c-type lectin domain family 4, member d, HIST1H2BC - histone cluster 1, h2bc, PGLYRP2 - peptidoglycan recognition protein 2, MYD88 - myeloid differentiation primary response 88, HIST2H2BE - histone cluster 2, h2be, NOS2 - nitric oxide synthase 2, inducible, CAMP - cathelicidin antimicrobial peptide, PRG2 - proteoglycan 2, bone marrow (natural killer cell activator, eosinophil granule ma…
GO:0072507	divalent inorganic cation homeostasis	3.3e-05	0.00423	1.48	14437	289	2998	89	[OPRL1 - opiate receptor-like 1, ATP2A1 - atpase, ca++ transporting, cardiac muscle, fast twitch 1, TRPV4 - transient receptor potential cation channel, subfamily v, member 4, SYPL2 - synaptophysin-like 2, BNIP3 - bcl2/adenovirus e1b 19kda interacting protein 3, GALR2 - galanin receptor 2, CHRNA7 - cholinergic receptor, nicotinic, alpha 7 (neuronal), TMTC2 - transmembrane and tetratricopeptide re…
GO:1990266	neutrophil migration	3.35e-05	0.00427	2.19	14437	55	2998	25	[ITGA9 - integrin, alpha 9, CCL3L3 - chemokine (c-c motif) ligand 3-like 3, LGALS3 - lectin, galactoside-binding, soluble, 3, AMICA1 - adhesion molecule, interacts with cxadr antigen 1, CCL4L2 - chemokine (c-c motif) ligand 4-like 2, S100A12 - s100 calcium binding protein a12, CCL13 - chemokine (c-c motif) ligand 13, TGFB2 - transforming growth factor, beta 2, CCL15 - chemokine (c-c motif) ligand…
GO:0006875	cellular metal ion homeostasis	3.95e-05	0.00498	1.44	14437	334	2998	100	[OPRL1 - opiate receptor-like 1, SYPL2 - synaptophysin-like 2, BNIP3 - bcl2/adenovirus e1b 19kda interacting protein 3, GALR2 - galanin receptor 2, GPR55 - g protein-coupled receptor 55, DDIT3 - dna-damage-inducible transcript 3, CXCL12 - chemokine (c-x-c motif) ligand 12, HEPH - hephaestin, PML - promyelocytic leukemia, CHRNA9 - cholinergic receptor, nicotinic, alpha 9 (neuronal), TRPC1 - transi…
GO:0048731	system development	4.12e-05	0.00515	1.35	14437	514	2998	144	[SLC4A10 - solute carrier family 4, sodium bicarbonate transporter, member 10, GFRA2 - gdnf family receptor alpha 2, CASZ1 - castor zinc finger 1, FLT4 - fms-related tyrosine kinase 4, SPOCK1 - sparc/osteonectin, cwcv and kazal-like domains proteoglycan (testican) 1, GDNF - glial cell derived neurotrophic factor, WFIKKN1 - wap, follistatin/kazal, immunoglobulin, kunitz and netrin domain containin…
GO:0070374	positive regulation of ERK1 and ERK2 cascade	4.14e-05	0.00513	1.71	14437	138	2998	49	[TRPV4 - transient receptor potential cation channel, subfamily v, member 4, CCL3L3 - chemokine (c-c motif) ligand 3-like 3, GPR55 - g protein-coupled receptor 55, FLT4 - fms-related tyrosine kinase 4, CAMK2D - calcium/calmodulin-dependent protein kinase ii delta, CTGF - connective tissue growth factor, KDR - kinase insert domain receptor (a type iii receptor tyrosine kinase), GCNT2 - glucosaminy…
GO:0050921	positive regulation of chemotaxis	4.29e-05	0.00527	1.85	14437	99	2998	38	[TIAM1 - t-cell lymphoma invasion and metastasis 1, TRPV4 - transient receptor potential cation channel, subfamily v, member 4, SCG2 - secretogranin ii, CMKLR1 - chemokine-like receptor 1, FGF10 - fibroblast growth factor 10, ARTN - artemin, CXCL9 - chemokine (c-x-c motif) ligand 9, ITGA2 - integrin, alpha 2 (cd49b, alpha 2 subunit of vla-2 receptor), CXCL12 - chemokine (c-x-c motif) ligand 12, A…
GO:2000021	regulation of ion homeostasis	4.46e-05	0.00543	1.67	14437	153	2998	53	[GSTM2 - glutathione s-transferase mu 2 (muscle), WNK4 - wnk lysine deficient protein kinase 4, DDIT3 - dna-damage-inducible transcript 3, CXCL9 - chemokine (c-x-c motif) ligand 9, ATP1A2 - atpase, na+/k+ transporting, alpha 2 polypeptide, SLC8A1 - solute carrier family 8 (sodium/calcium exchanger), member 1, CAMK2D - calcium/calmodulin-dependent protein kinase ii delta, KDR - kinase insert domai…
GO:0016477	cell migration	4.63e-05	0.00559	1.31	14437	624	2998	170	[MDGA1 - mam domain containing glycosylphosphatidylinositol anchor 1, EMP2 - epithelial membrane protein 2, FAM83D - family with sequence similarity 83, member d, FN1 - fibronectin 1, CDK1 - cyclin-dependent kinase 1, CD244 - cd244 molecule, natural killer cell receptor 2b4, SEMA4C - sema domain, immunoglobulin domain (ig), transmembrane domain (tm) and short cytoplasmic domain, (semaphorin) 4c, …
GO:0071345	cellular response to cytokine stimulus	4.81e-05	0.00575	1.57	14437	206	2998	67	[IFIT2 - interferon-induced protein with tetratricopeptide repeats 2, IFIT1 - interferon-induced protein with tetratricopeptide repeats 1, IFIT3 - interferon-induced protein with tetratricopeptide repeats 3, CCL3L3 - chemokine (c-c motif) ligand 3-like 3, NOS2 - nitric oxide synthase 2, inducible, BRCA1 - breast cancer 1, early onset, FABP4 - fatty acid binding protein 4, adipocyte, ADAMTS13 - ad…
GO:0055065	metal ion homeostasis	4.88e-05	0.00579	1.41	14437	380	2998	111	[OPRL1 - opiate receptor-like 1, SYPL2 - synaptophysin-like 2, BNIP3 - bcl2/adenovirus e1b 19kda interacting protein 3, GALR2 - galanin receptor 2, TMTC2 - transmembrane and tetratricopeptide repeat containing 2, TRIM24 - tripartite motif containing 24, GPR55 - g protein-coupled receptor 55, DDIT3 - dna-damage-inducible transcript 3, CXCL12 - chemokine (c-x-c motif) ligand 12, HEPH - hephaestin, …
GO:0001818	negative regulation of cytokine production	4.99e-05	0.00588	1.59	14437	191	2998	63	[DHX58 - dexh (asp-glu-x-his) box polypeptide 58, CHRNA7 - cholinergic receptor, nicotinic, alpha 7 (neuronal), FN1 - fibronectin 1, PRG2 - proteoglycan 2, bone marrow (natural killer cell activator, eosinophil granule major basic protein), ORM1 - orosomucoid 1, IL12B - interleukin 12b (natural killer cell stimulatory factor 2, cytotoxic lymphocyte maturation factor 2, p40), CD274 - cd274 molecul…
GO:0032879	regulation of localization	5.16e-05	0.00602	1.16	14437	2031	2998	489	[GFAP - glial fibrillary acidic protein, KIF20B - kinesin family member 20b, ABAT - 4-aminobutyrate aminotransferase, CATSPER2 - cation channel, sperm associated 2, GDNF - glial cell derived neurotrophic factor, PODXL - podocalyxin-like, PLXNB3 - plexin b3, SPINK1 - serine peptidase inhibitor, kazal type 1, PMAIP1 - phorbol-12-myristate-13-acetate-induced protein 1, GCNT2 - glucosaminyl (n-acetyl…
GO:0090279	regulation of calcium ion import	5.54e-05	0.00641	1.96	14437	76	2998	31	[GSTM2 - glutathione s-transferase mu 2 (muscle), KIAA1199 - kiaa1199, SLC8A1 - solute carrier family 8 (sodium/calcium exchanger), member 1, ATP1A2 - atpase, na+/k+ transporting, alpha 2 polypeptide, CXCL9 - chemokine (c-x-c motif) ligand 9, CAMK2D - calcium/calmodulin-dependent protein kinase ii delta, CXCL12 - chemokine (c-x-c motif) ligand 12, PDGFB - platelet-derived growth factor beta polyp…
GO:0098813	nuclear chromosome segregation	5.66e-05	0.0065	2.48	14437	35	2998	18	[DSN1 - dsn1, mis12 kinetochore complex component, CENPA - centromere protein a, PLK1 - polo-like kinase 1, NEK2 - nima-related kinase 2, MAD2L1 - mad2 mitotic arrest deficient-like 1 (yeast), SGOL1 - shugoshin-like 1 (s. pombe), NUSAP1 - nucleolar and spindle associated protein 1, NDC80 - ndc80 kinetochore complex component, TTK - ttk protein kinase, KIF25 - kinesin family member 25, SPAG5 - spe…
GO:0045071	negative regulation of viral genome replication	5.67e-05	0.00645	2.25	14437	47	2998	22	[IFITM1 - interferon induced transmembrane protein 1, APOBEC3G - apolipoprotein b mrna editing enzyme, catalytic polypeptide-like 3g, RSAD2 - radical s-adenosyl methionine domain containing 2, IFITM3 - interferon induced transmembrane protein 3, IFIT1 - interferon-induced protein with tetratricopeptide repeats 1, OAS3 - 2'-5'-oligoadenylate synthetase 3, 100kda, IFI16 - interferon, gamma-inducibl…
GO:0048565	digestive tract development	5.67e-05	0.0064	2.25	14437	47	2998	22	[DCHS1 - dachsous 1 (drosophila), TGFB2 - transforming growth factor, beta 2, CPS1 - carbamoyl-phosphate synthase 1, mitochondrial, GATA3 - gata binding protein 3, FAT4 - fat atypical cadherin 4, FOXF2 - forkhead box f2, WNT5A - wingless-type mmtv integration site family, member 5a, FOXF1 - forkhead box f1, PCSK5 - proprotein convertase subtilisin/kexin type 5, CCKBR - cholecystokinin b receptor,…
GO:0022414	reproductive process	5.78e-05	0.00648	1.24	14437	961	2998	248	[DSN1 - dsn1, mis12 kinetochore complex component, LHB - luteinizing hormone beta polypeptide, EMP2 - epithelial membrane protein 2, SIX5 - six homeobox 5, HSF2 - heat shock transcription factor 2, ABAT - 4-aminobutyrate aminotransferase, PLD6 - phospholipase d family, member 6, CATSPER2 - cation channel, sperm associated 2, FOXL2 - forkhead box l2, SEPT4 - septin 4, DIAPH3 - diaphanous-related f…
GO:0030278	regulation of ossification	5.88e-05	0.00654	1.67	14437	147	2998	51	[IFITM1 - interferon induced transmembrane protein 1, TOB1 - transducer of erbb2, 1, BMP2K - bmp2 inducible kinase, TMEM119 - transmembrane protein 119, SLC8A1 - solute carrier family 8 (sodium/calcium exchanger), member 1, WNT10B - wingless-type mmtv integration site family, member 10b, PBX1 - pre-b-cell leukemia homeobox 1, ID2 - inhibitor of dna binding 2, dominant negative helix-loop-helix pr…
GO:0034220	ion transmembrane transport	6.08e-05	0.00671	1.32	14437	589	2998	161	[FAM26E - family with sequence similarity 26, member e, SLC4A10 - solute carrier family 4, sodium bicarbonate transporter, member 10, DDIT3 - dna-damage-inducible transcript 3, MIP - major intrinsic protein of lens fiber, CATSPER2 - cation channel, sperm associated 2, TTYH1 - tweety homolog 1 (drosophila), SLC34A3 - solute carrier family 34 (type ii sodium/phosphate contransporter), member 3, TRP…
GO:0003018	vascular process in circulatory system	6.17e-05	0.00675	1.78	14437	111	2998	41	[ARHGAP42 - rho gtpase activating protein 42, TRPV4 - transient receptor potential cation channel, subfamily v, member 4, TJP1 - tight junction protein 1, NOS2 - nitric oxide synthase 2, inducible, SLC6A4 - solute carrier family 6 (neurotransmitter transporter), member 4, ADRA2C - adrenoceptor alpha 2c, SLC8A1 - solute carrier family 8 (sodium/calcium exchanger), member 1, ATP1A2 - atpase, na+/k+…
GO:0051783	regulation of nuclear division	6.26e-05	0.0068	1.66	14437	151	2998	52	[CDC6 - cell division cycle 6, CCSAP - centriole, cilia and spindle-associated protein, CDC20 - cell division cycle 20, KIF20B - kinesin family member 20b, ANLN - anillin, actin binding protein, CDC25C - cell division cycle 25c, BTC - betacellulin, MKI67 - antigen identified by monoclonal antibody ki-67, TACC3 - transforming, acidic coiled-coil containing protein 3, ANKRD53 - ankyrin repeat domai…
GO:0001934	positive regulation of protein phosphorylation	6.26e-05	0.00675	1.28	14437	725	2998	193	[EMP2 - epithelial membrane protein 2, GFRA2 - gdnf family receptor alpha 2, SEMA4C - sema domain, immunoglobulin domain (ig), transmembrane domain (tm) and short cytoplasmic domain, (semaphorin) 4c, CARD14 - caspase recruitment domain family, member 14, PROK1 - prokineticin 1, GCNT2 - glucosaminyl (n-acetyl) transferase 2, i-branching enzyme (i blood group), FGF18 - fibroblast growth factor 18, …
GO:0010758	regulation of macrophage chemotaxis	6.42e-05	0.00687	3.44	14437	14	2998	10	[CSF1 - colony stimulating factor 1 (macrophage), TRPV4 - transient receptor potential cation channel, subfamily v, member 4, SLAMF1 - signaling lymphocytic activation molecule family member 1, THBS1 - thrombospondin 1, CMKLR1 - chemokine-like receptor 1, STAP1 - signal transducing adaptor family member 1, CCL5 - chemokine (c-c motif) ligand 5, C5 - complement component 5, TNFSF18 - tumor necrosi…
GO:0044364	disruption of cells of other organism	6.42e-05	0.00682	3.44	14437	14	2998	10	[S100A12 - s100 calcium binding protein a12, HAMP - hepcidin antimicrobial peptide, C9 - complement component 9, CTSG - cathepsin g, GNLY - granulysin, ALB - albumin, CAMP - cathelicidin antimicrobial peptide, CHGA - chromogranin a (parathyroid secretory protein 1), ELANE - elastase, neutrophil expressed, AZU1 - azurocidin 1]
GO:0031640	killing of cells of other organism	6.42e-05	0.00677	3.44	14437	14	2998	10	[S100A12 - s100 calcium binding protein a12, HAMP - hepcidin antimicrobial peptide, C9 - complement component 9, CTSG - cathepsin g, GNLY - granulysin, ALB - albumin, CAMP - cathelicidin antimicrobial peptide, CHGA - chromogranin a (parathyroid secretory protein 1), ELANE - elastase, neutrophil expressed, AZU1 - azurocidin 1]
GO:0098662	inorganic cation transmembrane transport	6.46e-05	0.00676	1.41	14437	358	2998	105	[SLC4A10 - solute carrier family 4, sodium bicarbonate transporter, member 10, DDIT3 - dna-damage-inducible transcript 3, CATSPER2 - cation channel, sperm associated 2, SLC34A3 - solute carrier family 34 (type ii sodium/phosphate contransporter), member 3, TTYH1 - tweety homolog 1 (drosophila), TRPC3 - transient receptor potential cation channel, subfamily c, member 3, SLC9C2 - solute carrier fam…
GO:0048525	negative regulation of viral process	6.66e-05	0.00692	1.93	14437	80	2998	32	[IFITM1 - interferon induced transmembrane protein 1, IFIT1 - interferon-induced protein with tetratricopeptide repeats 1, IFI16 - interferon, gamma-inducible protein 16, OASL - 2'-5'-oligoadenylate synthetase-like, PTX3 - pentraxin 3, long, JUN - jun proto-oncogene, STAT1 - signal transducer and activator of transcription 1, 91kda, TRIM62 - tripartite motif containing 62, BST2 - bone marrow stro…
GO:0044243	multicellular organismal catabolic process	6.98e-05	0.00719	2.11	14437	57	2998	25	[CEL - carboxyl ester lipase, ADAMTS3 - adam metallopeptidase with thrombospondin type 1 motif, 3, PRTN3 - proteinase 3, ACE - angiotensin i converting enzyme, COL4A1 - collagen, type iv, alpha 1, CTSL - cathepsin l, MMP1 - matrix metallopeptidase 1 (interstitial collagenase), CTSK - cathepsin k, MMP7 - matrix metallopeptidase 7 (matrilysin, uterine), COL6A2 - collagen, type vi, alpha 2, MMP3 - m…
GO:0043270	positive regulation of ion transport	7.01e-05	0.00717	1.61	14437	174	2998	58	[GSTM2 - glutathione s-transferase mu 2 (muscle), GALR2 - galanin receptor 2, PLA2R1 - phospholipase a2 receptor 1, 180kda, CHRNB2 - cholinergic receptor, nicotinic, beta 2 (neuronal), RNF207 - ring finger protein 207, SLC6A4 - solute carrier family 6 (neurotransmitter transporter), member 4, WNK4 - wnk lysine deficient protein kinase 4, CXCL9 - chemokine (c-x-c motif) ligand 9, ABAT - 4-aminobut…
GO:0055074	calcium ion homeostasis	7.33e-05	0.00745	1.48	14437	267	2998	82	[OPRL1 - opiate receptor-like 1, ATP2A1 - atpase, ca++ transporting, cardiac muscle, fast twitch 1, TRPV4 - transient receptor potential cation channel, subfamily v, member 4, SYPL2 - synaptophysin-like 2, BNIP3 - bcl2/adenovirus e1b 19kda interacting protein 3, GALR2 - galanin receptor 2, CHRNA7 - cholinergic receptor, nicotinic, alpha 7 (neuronal), TMTC2 - transmembrane and tetratricopeptide re…
GO:0032502	developmental process	7.42e-05	0.00748	1.11	14437	3620	2998	833	[GFAP - glial fibrillary acidic protein, GFI1 - growth factor independent 1 transcription repressor, GFRA2 - gdnf family receptor alpha 2, RNPC3 - rna-binding region (rnp1, rrm) containing 3, ABAT - 4-aminobutyrate aminotransferase, CATSPER2 - cation channel, sperm associated 2, GDNF - glial cell derived neurotrophic factor, SEPT4 - septin 4, CCDC67 - coiled-coil domain containing 67, PODXL - pod…
ain containing 12, KLHL31 - kelch-like family member 31, WDR62 - wd repeat domain 62, NR2F6 - nuclear receptor subfamily 2, group f, member 6, MPO - myeloperoxidase, AFF2 - af4/fmr2 family, member 2, FN1 - fibronectin 1, FLT4 - fms-related tyrosine kinase 4, ITFG2 - integrin alpha fg-gap repeat containing 2, CDON - cell adhesion associated, oncogene regulated, PROX2 - prospero homeobox 2, TCP11 -…
GO:0009620	response to fungus	7.44e-05	0.00745	2.68	14437	27	2998	15	[S100A12 - s100 calcium binding protein a12, CTSG - cathepsin g, PTX3 - pentraxin 3, long, GNLY - granulysin, CLEC6A - c-type lectin domain family 6, member a, S100A8 - s100 calcium binding protein a8, S100A9 - s100 calcium binding protein a9, HAMP - hepcidin antimicrobial peptide, TLR4 - toll-like receptor 4, IL36RN - interleukin 36 receptor antagonist, CHGA - chromogranin a (parathyroid secreto…
GO:0061035	regulation of cartilage development	7.98e-05	0.00794	2.17	14437	51	2998	23	[ADAMTS12 - adam metallopeptidase with thrombospondin type 1 motif, 12, TGFBR1 - transforming growth factor, beta receptor 1, HOXA11 - homeobox a11, TGFB2 - transforming growth factor, beta 2, SOX6 - sry (sex determining region y)-box 6, WNT5A - wingless-type mmtv integration site family, member 5a, SHOX2 - short stature homeobox 2, SIX2 - six homeobox 2, SNAI2 - snail family zinc finger 2, POR -…
GO:0050880	regulation of blood vessel size	8.07e-05	0.00798	1.85	14437	91	2998	35	[ARHGAP42 - rho gtpase activating protein 42, SLC6A4 - solute carrier family 6 (neurotransmitter transporter), member 4, NOS2 - nitric oxide synthase 2, inducible, ADRA2C - adrenoceptor alpha 2c, ATP1A2 - atpase, na+/k+ transporting, alpha 2 polypeptide, SLC8A1 - solute carrier family 8 (sodium/calcium exchanger), member 1, CHRM3 - cholinergic receptor, muscarinic 3, EGFR - epidermal growth facto…
GO:0035150	regulation of tube size	8.07e-05	0.00792	1.85	14437	91	2998	35	[ARHGAP42 - rho gtpase activating protein 42, SLC6A4 - solute carrier family 6 (neurotransmitter transporter), member 4, NOS2 - nitric oxide synthase 2, inducible, ADRA2C - adrenoceptor alpha 2c, ATP1A2 - atpase, na+/k+ transporting, alpha 2 polypeptide, SLC8A1 - solute carrier family 8 (sodium/calcium exchanger), member 1, CHRM3 - cholinergic receptor, muscarinic 3, EGFR - epidermal growth facto…
GO:0009617	response to bacterium	8.26e-05	0.00804	1.66	14437	145	2998	50	[HIST1H2BC - histone cluster 1, h2bc, HIST2H2BE - histone cluster 2, h2be, NOS2 - nitric oxide synthase 2, inducible, PRG2 - proteoglycan 2, bone marrow (natural killer cell activator, eosinophil granule major basic protein), CAMP - cathelicidin antimicrobial peptide, IL12B - interleukin 12b (natural killer cell stimulatory factor 2, cytotoxic lymphocyte maturation factor 2, p40), IL12A - interle…
GO:0042573	retinoic acid metabolic process	8.44e-05	0.00816	3.61	14437	12	2998	9	[ALDH1A3 - aldehyde dehydrogenase 1 family, member a3, RDH10 - retinol dehydrogenase 10 (all-trans), BCO2 - beta-carotene oxygenase 2, CYP1A1 - cytochrome p450, family 1, subfamily a, polypeptide 1, DHRS9 - dehydrogenase/reductase (sdr family) member 9, CRABP2 - cellular retinoic acid binding protein 2, CRABP1 - cellular retinoic acid binding protein 1, CYP26B1 - cytochrome p450, family 26, subfa…
GO:0072503	cellular divalent inorganic cation homeostasis	8.5e-05	0.00817	1.47	14437	272	2998	83	[OPRL1 - opiate receptor-like 1, ATP2A1 - atpase, ca++ transporting, cardiac muscle, fast twitch 1, TRPV4 - transient receptor potential cation channel, subfamily v, member 4, BNIP3 - bcl2/adenovirus e1b 19kda interacting protein 3, SYPL2 - synaptophysin-like 2, GALR2 - galanin receptor 2, CHRNA7 - cholinergic receptor, nicotinic, alpha 7 (neuronal), GPR55 - g protein-coupled receptor 55, DDIT3 -…
GO:0030198	extracellular matrix organization	8.6e-05	0.0082	1.52	14437	225	2998	71	[GFAP - glial fibrillary acidic protein, ITGA10 - integrin, alpha 10, FN1 - fibronectin 1, NOXO1 - nadph oxidase organizer 1, KDR - kinase insert domain receptor (a type iii receptor tyrosine kinase), CCDC80 - coiled-coil domain containing 80, SPARC - secreted protein, acidic, cysteine-rich (osteonectin), FBLN1 - fibulin 1, CTSL - cathepsin l, CTSK - cathepsin k, MMP1 - matrix metallopeptidase 1 …
GO:0090280	positive regulation of calcium ion import	9.19e-05	0.00871	2.35	14437	39	2998	19	[GSTM2 - glutathione s-transferase mu 2 (muscle), BDKRB1 - bradykinin receptor b1, ZP3 - zona pellucida glycoprotein 3 (sperm receptor), KIAA1199 - kiaa1199, CXCL9 - chemokine (c-x-c motif) ligand 9, CXCL10 - chemokine (c-x-c motif) ligand 10, CCL2 - chemokine (c-c motif) ligand 2, CXCL12 - chemokine (c-x-c motif) ligand 12, HAP1 - huntingtin-associated protein 1, F2RL3 - coagulation factor ii (t…
GO:1903901	negative regulation of viral life cycle	9.93e-05	0.00935	1.91	14437	78	2998	31	[IFITM1 - interferon induced transmembrane protein 1, IFIT1 - interferon-induced protein with tetratricopeptide repeats 1, IFI16 - interferon, gamma-inducible protein 16, OASL - 2'-5'-oligoadenylate synthetase-like, PTX3 - pentraxin 3, long, JUN - jun proto-oncogene, TRIM62 - tripartite motif containing 62, BST2 - bone marrow stromal cell antigen 2, ISG15 - isg15 ubiquitin-like modifier, PML - pr…
GO:0043062	extracellular structure organization	0.0001	0.00938	1.51	14437	226	2998	71	[GFAP - glial fibrillary acidic protein, ITGA10 - integrin, alpha 10, FN1 - fibronectin 1, NOXO1 - nadph oxidase organizer 1, KDR - kinase insert domain receptor (a type iii receptor tyrosine kinase), CCDC80 - coiled-coil domain containing 80, SPARC - secreted protein, acidic, cysteine-rich (osteonectin), FBLN1 - fibulin 1, CTSL - cathepsin l, CTSK - cathepsin k, MMP1 - matrix metallopeptidase 1 …
GO:0070887	cellular response to chemical stimulus	0.000103	0.00956	1.22	14437	1074	2998	272	[RGS19 - regulator of g-protein signaling 19, LILRB2 - leukocyte immunoglobulin-like receptor, subfamily b (with tm and itim domains), member 2, BNIP3 - bcl2/adenovirus e1b 19kda interacting protein 3, GFI1 - growth factor independent 1 transcription repressor, NPAS4 - neuronal pas domain protein 4, TRIM24 - tripartite motif containing 24, AANAT - aralkylamine n-acetyltransferase, BRCA1 - breast …
GO:0048246	macrophage chemotaxis	0.000103	0.0095	3.85	14437	10	2998	8	[SFTPD - surfactant protein d, EDNRB - endothelin receptor type b, CKLF - chemokine-like factor, CCL5 - chemokine (c-c motif) ligand 5, LGALS3 - lectin, galactoside-binding, soluble, 3, CCL2 - chemokine (c-c motif) ligand 2, AZU1 - azurocidin 1, CCL3 - chemokine (c-c motif) ligand 3]
GO:0014066	regulation of phosphatidylinositol 3-kinase signaling	0.000107	0.00984	1.73	14437	117	2998	42	[PIK3IP1 - phosphoinositide-3-kinase interacting protein 1, KL - klotho, PPP1R16B - protein phosphatase 1, regulatory subunit 16b, FGFR3 - fibroblast growth factor receptor 3, EREG - epiregulin, FGF10 - fibroblast growth factor 10, KLB - klotho beta, FGF5 - fibroblast growth factor 5, NTRK2 - neurotrophic tyrosine kinase, receptor, type 2, PDGFB - platelet-derived growth factor beta polypeptide, …
GO:0048245	eosinophil chemotaxis	0.000108	0.00988	4.21	14437	8	2998	7	[SCG2 - secretogranin ii, CCL13 - chemokine (c-c motif) ligand 13, HRH1 - histamine receptor h1, CCL5 - chemokine (c-c motif) ligand 5, LGALS3 - lectin, galactoside-binding, soluble, 3, CCL7 - chemokine (c-c motif) ligand 7, CCL3 - chemokine (c-c motif) ligand 3]
GO:0000070	mitotic sister chromatid segregation	0.000116	0.0105	2.7	14437	25	2998	14	[DSN1 - dsn1, mis12 kinetochore complex component, CENPA - centromere protein a, PLK1 - polo-like kinase 1, NEK2 - nima-related kinase 2, MAD2L1 - mad2 mitotic arrest deficient-like 1 (yeast), NDC80 - ndc80 kinetochore complex component, NUSAP1 - nucleolar and spindle associated protein 1, SPAG5 - sperm associated antigen 5, KIF25 - kinesin family member 25, KIFC1 - kinesin family member c1, ZWIN…
GO:0043408	regulation of MAPK cascade	0.000116	0.0105	1.31	14437	558	2998	152	[FAM83D - family with sequence similarity 83, member d, FN1 - fibronectin 1, CDK1 - cyclin-dependent kinase 1, GPR55 - g protein-coupled receptor 55, SEMA4C - sema domain, immunoglobulin domain (ig), transmembrane domain (tm) and short cytoplasmic domain, (semaphorin) 4c, FLT4 - fms-related tyrosine kinase 4, MID1 - midline 1 (opitz/bbb syndrome), PBK - pdz binding kinase, INHBA - inhibin, beta a…
GO:0000819	sister chromatid segregation	0.00013	0.0116	2.58	14437	28	2998	15	[DSN1 - dsn1, mis12 kinetochore complex component, CENPA - centromere protein a, PLK1 - polo-like kinase 1, NEK2 - nima-related kinase 2, MAD2L1 - mad2 mitotic arrest deficient-like 1 (yeast), NDC80 - ndc80 kinetochore complex component, NUSAP1 - nucleolar and spindle associated protein 1, SPAG5 - sperm associated antigen 5, KIF25 - kinesin family member 25, KIFC1 - kinesin family member c1, TOP2…
GO:0033993	response to lipid	0.000131	0.0117	1.3	14437	572	2998	155	[OPRL1 - opiate receptor-like 1, LILRB2 - leukocyte immunoglobulin-like receptor, subfamily b (with tm and itim domains), member 2, GFI1 - growth factor independent 1 transcription repressor, NPAS4 - neuronal pas domain protein 4, AANAT - aralkylamine n-acetyltransferase, PAQR9 - progestin and adipoq receptor family member ix, CXCL9 - chemokine (c-x-c motif) ligand 9, CATSPER2 - cation channel, s…
GO:0035295	tube development	0.000133	0.0117	1.65	14437	140	2998	48	[DCHS1 - dachsous 1 (drosophila), PAX8 - paired box 8, STAT1 - signal transducer and activator of transcription 1, 91kda, KIF18A - kinesin family member 18a, ZNF358 - zinc finger protein 358, AQP11 - aquaporin 11, SDC4 - syndecan 4, RARB - retinoic acid receptor, beta, STRA6 - stimulated by retinoic acid 6, EGFR - epidermal growth factor receptor, ARG2 - arginase 2, ALX4 - alx homeobox 4, WNT11 -…
GO:0006959	humoral immune response	0.000135	0.0118	1.81	14437	93	2998	35	[C9 - complement component 9, HIST1H2BC - histone cluster 1, h2bc, HIST2H2BE - histone cluster 2, h2be, PAX5 - paired box 5, CAMP - cathelicidin antimicrobial peptide, BLNK - b-cell linker, AZU1 - azurocidin 1, TNFRSF21 - tumor necrosis factor receptor superfamily, member 21, RGCC - regulator of cell cycle, BST2 - bone marrow stromal cell antigen 2, HIST1H2BF - histone cluster 1, h2bf, CLU - clus…
GO:0050918	positive chemotaxis	0.000138	0.0121	2.49	14437	31	2998	16	[SCG2 - secretogranin ii, VEGFA - vascular endothelial growth factor a, CCL15 - chemokine (c-c motif) ligand 15, FGF10 - fibroblast growth factor 10, CCL5 - chemokine (c-c motif) ligand 5, MET - met proto-oncogene, CXCL12 - chemokine (c-x-c motif) ligand 12, WNT5A - wingless-type mmtv integration site family, member 5a, CCL3 - chemokine (c-c motif) ligand 3, FGF7 - fibroblast growth factor 7, PDG…
GO:0048870	cell motility	0.00014	0.0121	1.28	14437	679	2998	180	[EMP2 - epithelial membrane protein 2, MDGA1 - mam domain containing glycosylphosphatidylinositol anchor 1, FAM83D - family with sequence similarity 83, member d, CDK1 - cyclin-dependent kinase 1, FN1 - fibronectin 1, CD244 - cd244 molecule, natural killer cell receptor 2b4, SEMA4C - sema domain, immunoglobulin domain (ig), transmembrane domain (tm) and short cytoplasmic domain, (semaphorin) 4c, …
GO:0040036	regulation of fibroblast growth factor receptor signaling pathway	0.000147	0.0127	2.89	14437	20	2998	12	[SHISA2 - shisa family member 2, THBS1 - thrombospondin 1, GATA3 - gata binding protein 3, DUSP6 - dual specificity phosphatase 6, FAM20C - family with sequence similarity 20, member c, SPRY1 - sprouty homolog 1, antagonist of fgf signaling (drosophila), LRIT3 - leucine-rich repeat, immunoglobulin-like and transmembrane domains 3, NOG - noggin, HHIP - hedgehog interacting protein, WNT5A - wingles…
GO:0050801	ion homeostasis	0.000151	0.0129	1.33	14437	481	2998	133	[OPRL1 - opiate receptor-like 1, SLC4A10 - solute carrier family 4, sodium bicarbonate transporter, member 10, SYPL2 - synaptophysin-like 2, BNIP3 - bcl2/adenovirus e1b 19kda interacting protein 3, GALR2 - galanin receptor 2, TMTC2 - transmembrane and tetratricopeptide repeat containing 2, TRIM24 - tripartite motif containing 24, GPR55 - g protein-coupled receptor 55, DDIT3 - dna-damage-inducible…
GO:0070661	leukocyte proliferation	0.000155	0.0132	1.97	14437	66	2998	27	[CCND3 - cyclin d3, IL23A - interleukin 23, alpha subunit p19, CARD11 - caspase recruitment domain family, member 11, TNFRSF4 - tumor necrosis factor receptor superfamily, member 4, SLC11A1 - solute carrier family 11 (proton-coupled divalent metal ion transporter), member 1, TNFSF4 - tumor necrosis factor (ligand) superfamily, member 4, ACE - angiotensin i converting enzyme, GAPT - grb2-binding a…
GO:0051781	positive regulation of cell division	0.000172	0.0145	1.99	14437	63	2998	26	[CDC6 - cell division cycle 6, KIF14 - kinesin family member 14, EREG - epiregulin, KIF20B - kinesin family member 20b, MDK - midkine (neurite growth-promoting factor 2), AURKB - aurora kinase b, CDC25B - cell division cycle 25b, FGF5 - fibroblast growth factor 5, FGF7 - fibroblast growth factor 7, PDGFB - platelet-derived growth factor beta polypeptide, BTC - betacellulin, PROK1 - prokineticin 1…
GO:0042221	response to chemical	0.000174	0.0147	1.16	14437	1824	2998	438	[GFI1 - growth factor independent 1 transcription repressor, NPAS4 - neuronal pas domain protein 4, AANAT - aralkylamine n-acetyltransferase, ABAT - 4-aminobutyrate aminotransferase, CATSPER2 - cation channel, sperm associated 2, GATSL3 - gats protein-like 3, LIFR - leukemia inhibitory factor receptor alpha, GCNT1 - glucosaminyl (n-acetyl) transferase 1, core 2, LDLR - low density lipoprotein rec…
GO:0008016	regulation of heart contraction	0.000175	0.0146	1.59	14437	164	2998	54	[FXYD2 - fxyd domain containing ion transport regulator 2, GSTM2 - glutathione s-transferase mu 2 (muscle), ATP2A1 - atpase, ca++ transporting, cardiac muscle, fast twitch 1, RNF207 - ring finger protein 207, ATP1A2 - atpase, na+/k+ transporting, alpha 2 polypeptide, SLC8A1 - solute carrier family 8 (sodium/calcium exchanger), member 1, NOS1AP - nitric oxide synthase 1 (neuronal) adaptor protein,…
GO:0051952	regulation of amine transport	0.000177	0.0147	2.12	14437	50	2998	22	[KCNA2 - potassium voltage-gated channel, shaker-related subfamily, member 2, PINK1 - pten induced putative kinase 1, P2RX7 - purinergic receptor p2x, ligand-gated ion channel, 7, CHRNB2 - cholinergic receptor, nicotinic, beta 2 (neuronal), ADRA2C - adrenoceptor alpha 2c, CHRNA3 - cholinergic receptor, nicotinic, alpha 3 (neuronal), ATP1A2 - atpase, na+/k+ transporting, alpha 2 polypeptide, ABAT …
GO:0032496	response to lipopolysaccharide	0.000184	0.0152	1.48	14437	234	2998	72	[LILRB2 - leukocyte immunoglobulin-like receptor, subfamily b (with tm and itim domains), member 2, GFI1 - growth factor independent 1 transcription repressor, TIMP4 - timp metallopeptidase inhibitor 4, TJP1 - tight junction protein 1, NOS2 - nitric oxide synthase 2, inducible, ADAMTS13 - adam metallopeptidase with thrombospondin type 1 motif, 13, CXCL9 - chemokine (c-x-c motif) ligand 9, IL12B -…
GO:0007631	feeding behavior	0.00019	0.0156	2.15	14437	47	2998	21	[OPRL1 - opiate receptor-like 1, GALR2 - galanin receptor 2, CHRNB2 - cholinergic receptor, nicotinic, beta 2 (neuronal), MRAP2 - melanocortin 2 receptor accessory protein 2, BBS12 - bardet-biedl syndrome 12, NPW - neuropeptide w, PYY - peptide yy, GALR3 - galanin receptor 3, NTRK2 - neurotrophic tyrosine kinase, receptor, type 2, CCKBR - cholecystokinin b receptor, PMCH - pro-melanin-concentrati…
GO:0072676	lymphocyte migration	0.000202	0.0165	2.19	14437	44	2998	20	[CCL3L3 - chemokine (c-c motif) ligand 3-like 3, CCL13 - chemokine (c-c motif) ligand 13, GATA3 - gata binding protein 3, CCL15 - chemokine (c-c motif) ligand 15, ARTN - artemin, CCL8 - chemokine (c-c motif) ligand 8, CXCL10 - chemokine (c-x-c motif) ligand 10, CCL2 - chemokine (c-c motif) ligand 2, CCL3L1 - chemokine (c-c motif) ligand 3-like 1, CCL3 - chemokine (c-c motif) ligand 3, MYO1G - myo…
GO:0007088	regulation of mitotic nuclear division	0.000202	0.0164	1.65	14437	131	2998	45	[CDC6 - cell division cycle 6, CCSAP - centriole, cilia and spindle-associated protein, CEP97 - centrosomal protein 97kda, NEK2 - nima-related kinase 2, EPGN - epithelial mitogen, DLGAP5 - discs, large (drosophila) homolog-associated protein 5, CENPE - centromere protein e, 312kda, EREG - epiregulin, KIF20B - kinesin family member 20b, CENPF - centromere protein f, 350/400kda, ANLN - anillin, act…
GO:0003013	circulatory system process	0.000205	0.0165	1.62	14437	146	2998	49	[TRPV4 - transient receptor potential cation channel, subfamily v, member 4, SLC6A4 - solute carrier family 6 (neurotransmitter transporter), member 4, NOS2 - nitric oxide synthase 2, inducible, TJP1 - tight junction protein 1, RCAN1 - regulator of calcineurin 1, ADRA2C - adrenoceptor alpha 2c, ATP1A2 - atpase, na+/k+ transporting, alpha 2 polypeptide, SLC8A1 - solute carrier family 8 (sodium/cal…
GO:0044708	single-organism behavior	0.000218	0.0175	1.44	14437	271	2998	81	[SLC4A10 - solute carrier family 4, sodium bicarbonate transporter, member 10, AFF2 - af4/fmr2 family, member 2, CSTB - cystatin b (stefin b), GALR2 - galanin receptor 2, NPAS4 - neuronal pas domain protein 4, CHRNA7 - cholinergic receptor, nicotinic, alpha 7 (neuronal), GPR52 - g protein-coupled receptor 52, CHRNB2 - cholinergic receptor, nicotinic, beta 2 (neuronal), SLC6A4 - solute carrier fam…
GO:0010043	response to zinc ion	0.00022	0.0176	2.28	14437	38	2998	18	[MT1X - metallothionein 1x, D2HGDH - d-2-hydroxyglutarate dehydrogenase, SLC30A10 - solute carrier family 30, member 10, P2RX7 - purinergic receptor p2x, ligand-gated ion channel, 7, MT2A - metallothionein 2a, CPS1 - carbamoyl-phosphate synthase 1, mitochondrial, SLC30A3 - solute carrier family 30 (zinc transporter), member 3, MT1B - metallothionein 1b, AANAT - aralkylamine n-acetyltransferase, G…
GO:0050710	negative regulation of cytokine secretion	0.00022	0.0175	2.28	14437	38	2998	18	[FFAR4 - free fatty acid receptor 4, SLAMF1 - signaling lymphocytic activation molecule family member 1, FN1 - fibronectin 1, PTPN22 - protein tyrosine phosphatase, non-receptor type 22 (lymphoid), IL1R2 - interleukin 1 receptor, type ii, GBP1 - guanylate binding protein 1, interferon-inducible, TNFRSF21 - tumor necrosis factor receptor superfamily, member 21, LRRC32 - leucine rich repeat contain…
GO:0050832	defense response to fungus	0.000224	0.0177	2.94	14437	18	2998	11	[S100A12 - s100 calcium binding protein a12, HAMP - hepcidin antimicrobial peptide, CTSG - cathepsin g, GNLY - granulysin, IL36RN - interleukin 36 receptor antagonist, CLEC6A - c-type lectin domain family 6, member a, CHGA - chromogranin a (parathyroid secretory protein 1), S100A8 - s100 calcium binding protein a8, LTF - lactotransferrin, MPO - myeloperoxidase, S100A9 - s100 calcium binding prote…
GO:0046135	pyrimidine nucleoside catabolic process	0.000224	0.0176	2.94	14437	18	2998	11	[APOBEC3G - apolipoprotein b mrna editing enzyme, catalytic polypeptide-like 3g, APOBEC3A - apolipoprotein b mrna editing enzyme, catalytic polypeptide-like 3a, APOBEC3F - apolipoprotein b mrna editing enzyme, catalytic polypeptide-like 3f, NT5M - 5',3'-nucleotidase, mitochondrial, CDA - cytidine deaminase, NT5C1A - 5'-nucleotidase, cytosolic ia, DPYS - dihydropyrimidinase, AICDA - activation-ind…
GO:0035455	response to interferon-alpha	0.000224	0.0175	2.94	14437	18	2998	11	[IFITM1 - interferon induced transmembrane protein 1, IFIT2 - interferon-induced protein with tetratricopeptide repeats 2, BST2 - bone marrow stromal cell antigen 2, AXL - axl receptor tyrosine kinase, IFITM3 - interferon induced transmembrane protein 3, IFIT3 - interferon-induced protein with tetratricopeptide repeats 3, MX2 - myxovirus (influenza virus) resistance 2 (mouse), GATA3 - gata bindin…
GO:0032729	positive regulation of interferon-gamma production	0.00023	0.0178	2.05	14437	54	2998	23	[SLAMF1 - signaling lymphocytic activation molecule family member 1, IL27RA - interleukin 27 receptor, alpha, SASH3 - sam and sh3 domain containing 3, FZD5 - frizzled family receptor 5, ZP3 - zona pellucida glycoprotein 3 (sperm receptor), PTPN22 - protein tyrosine phosphatase, non-receptor type 22 (lymphoid), CD244 - cd244 molecule, natural killer cell receptor 2b4, HLA-DPA1 - major histocompati…
GO:0002237	response to molecule of bacterial origin	0.000247	0.0191	1.46	14437	248	2998	75	[LILRB2 - leukocyte immunoglobulin-like receptor, subfamily b (with tm and itim domains), member 2, GFI1 - growth factor independent 1 transcription repressor, TIMP4 - timp metallopeptidase inhibitor 4, NOS2 - nitric oxide synthase 2, inducible, TJP1 - tight junction protein 1, ADAMTS13 - adam metallopeptidase with thrombospondin type 1 motif, 13, CXCL9 - chemokine (c-x-c motif) ligand 9, IL12B -…
GO:0048869	cellular developmental process	0.000249	0.0191	1.15	14437	1940	2998	462	[GFAP - glial fibrillary acidic protein, MDGA1 - mam domain containing glycosylphosphatidylinositol anchor 1, GFI1 - growth factor independent 1 transcription repressor, NPAS4 - neuronal pas domain protein 4, KIF20B - kinesin family member 20b, SPOCK1 - sparc/osteonectin, cwcv and kazal-like domains proteoglycan (testican) 1, CATSPER2 - cation channel, sperm associated 2, SEPT4 - septin 4, GDNF -…
GO:0006811	ion transport	0.000249	0.019	1.22	14437	938	2998	238	[PITPNM1 - phosphatidylinositol transfer protein, membrane-associated 1, CATSPER2 - cation channel, sperm associated 2, ANO8 - anoctamin 8, LDLR - low density lipoprotein receptor, TRPC3 - transient receptor potential cation channel, subfamily c, member 3, SLC9C2 - solute carrier family 9, member c2 (putative), BEST4 - bestrophin 4, KCNE1L - kcne1-like, SLC25A13 - solute carrier family 25 (aspart…
GO:0044699	single-organism process	0.000252	0.0192	1.05	14437	8350	2998	1818	[ABAT - 4-aminobutyrate aminotransferase, CATSPER2 - cation channel, sperm associated 2, SEPT4 - septin 4, PODXL - podocalyxin-like, SH2D1B - sh2 domain containing 1b, PLXNB3 - plexin b3, WFIKKN1 - wap, follistatin/kazal, immunoglobulin, kunitz and netrin domain containing 1, PMCH - pro-melanin-concentrating hormone, PMAIP1 - phorbol-12-myristate-13-acetate-induced protein 1, PNOC - prepronocicep…
ain (tm), and cytoplasmic domain, (semaphorin) 6a, BCL2L15 - bcl2-like 15, SLC14A1 - solute carrier family 14 (urea transporter), member 1, SLC13A1 - solute carrier family 13 (sodium/sulfate symporter), member 1, DPYS - dihydropyrimidinase, SKP2 - s-phase kinase-associated protein 2, e3 ubiquitin protein ligase, SLAMF1 - signaling lymphocytic activation molecule family member 1, DUT - deoxyuridin…
1 family interacting protein 4 (class ii), ABCG1 - atp-binding cassette, sub-family g (white), member 1, SLC22A17 - solute carrier family 22, member 17, HHIPL1 - hhip-like 1, L3MBTL3 - l(3)mbt-like 3 (drosophila), BMP8A - bone morphogenetic protein 8a, CEND1 - cell cycle exit and neuronal differentiation 1, RAB3D - rab3d, member ras oncogene family, BRSK1 - br serine/threonine kinase 1, NRG2 - ne…
GO:0044236	multicellular organism metabolic process	0.000254	0.0192	1.85	14437	78	2998	30	[CEL - carboxyl ester lipase, TRPV4 - transient receptor potential cation channel, subfamily v, member 4, AKR1C3 - aldo-keto reductase family 1, member c3, ADAMTS3 - adam metallopeptidase with thrombospondin type 1 motif, 3, PRTN3 - proteinase 3, PPARGC1A - peroxisome proliferator-activated receptor gamma, coactivator 1 alpha, ACE - angiotensin i converting enzyme, COL4A1 - collagen, type iv, alp…
GO:0030814	regulation of cAMP metabolic process	0.000254	0.0191	1.81	14437	85	2998	32	[OPRL1 - opiate receptor-like 1, GALR2 - galanin receptor 2, LTB4R2 - leukotriene b4 receptor 2, MRAP2 - melanocortin 2 receptor accessory protein 2, CXCL9 - chemokine (c-x-c motif) ligand 9, GALR1 - galanin receptor 1, AVPR2 - arginine vasopressin receptor 2, ADCY6 - adenylate cyclase 6, HTR1B - 5-hydroxytryptamine (serotonin) receptor 1b, g protein-coupled, PTHLH - parathyroid hormone-like horm…
GO:0097746	regulation of blood vessel diameter	0.000254	0.019	1.81	14437	85	2998	32	[ARHGAP42 - rho gtpase activating protein 42, SLC6A4 - solute carrier family 6 (neurotransmitter transporter), member 4, NOS2 - nitric oxide synthase 2, inducible, ADRA2C - adrenoceptor alpha 2c, ATP1A2 - atpase, na+/k+ transporting, alpha 2 polypeptide, SLC8A1 - solute carrier family 8 (sodium/calcium exchanger), member 1, CHRM3 - cholinergic receptor, muscarinic 3, EGFR - epidermal growth facto…
GO:0035296	regulation of tube diameter	0.000254	0.0189	1.81	14437	85	2998	32	[ARHGAP42 - rho gtpase activating protein 42, SLC6A4 - solute carrier family 6 (neurotransmitter transporter), member 4, NOS2 - nitric oxide synthase 2, inducible, ADRA2C - adrenoceptor alpha 2c, ATP1A2 - atpase, na+/k+ transporting, alpha 2 polypeptide, SLC8A1 - solute carrier family 8 (sodium/calcium exchanger), member 1, CHRM3 - cholinergic receptor, muscarinic 3, EGFR - epidermal growth facto…
GO:0006874	cellular calcium ion homeostasis	0.000284	0.021	1.44	14437	257	2998	77	[OPRL1 - opiate receptor-like 1, ATP2A1 - atpase, ca++ transporting, cardiac muscle, fast twitch 1, TRPV4 - transient receptor potential cation channel, subfamily v, member 4, SYPL2 - synaptophysin-like 2, BNIP3 - bcl2/adenovirus e1b 19kda interacting protein 3, GALR2 - galanin receptor 2, CHRNA7 - cholinergic receptor, nicotinic, alpha 7 (neuronal), GPR55 - g protein-coupled receptor 55, DDIT3 -…
GO:0051049	regulation of transport	0.000285	0.021	1.17	14437	1446	2998	352	[RGS19 - regulator of g-protein signaling 19, GFAP - glial fibrillary acidic protein, LILRB2 - leukocyte immunoglobulin-like receptor, subfamily b (with tm and itim domains), member 2, GALR2 - galanin receptor 2, PLA2R1 - phospholipase a2 receptor 1, 180kda, KIF20B - kinesin family member 20b, ABAT - 4-aminobutyrate aminotransferase, CATSPER2 - cation channel, sperm associated 2, CD274 - cd274 mo…
GO:0006334	nucleosome assembly	0.000287	0.021	1.71	14437	107	2998	38	[HIST1H3D - histone cluster 1, h3d, HIST1H3C - histone cluster 1, h3c, HIST1H2BD - histone cluster 1, h2bd, CENPA - centromere protein a, H2AFX - h2a histone family, member x, HIST1H2BC - histone cluster 1, h2bc, ITGB3BP - integrin beta 3 binding protein (beta3-endonexin), HIST1H2BO - histone cluster 1, h2bo, HIST2H2BE - histone cluster 2, h2be, CENPM - centromere protein m, HIST1H1E - histone cl…
GO:0006968	cellular defense response	0.000293	0.0213	2.14	14437	45	2998	20	[LILRB2 - leukocyte immunoglobulin-like receptor, subfamily b (with tm and itim domains), member 2, CCR5 - chemokine (c-c motif) receptor 5 (gene/pseudogene), KIR2DL4 - killer cell immunoglobulin-like receptor, two domains, long cytoplasmic tail, 4, HLA-G - major histocompatibility complex, class i, g, DCDC2 - doublecortin domain containing 2, PRF1 - perforin 1 (pore forming protein), GNLY - gran…
GO:0007218	neuropeptide signaling pathway	0.000293	0.0212	2.14	14437	45	2998	20	[OPRL1 - opiate receptor-like 1, NPB - neuropeptide b, PROK2 - prokineticin 2, GALR2 - galanin receptor 2, NPBWR1 - neuropeptides b/w receptor 1, RXFP4 - relaxin/insulin-like family peptide receptor 4, LTB4R2 - leukotriene b4 receptor 2, SORCS2 - sortilin-related vps10 domain containing receptor 2, PENK - proenkephalin, PYY - peptide yy, NPW - neuropeptide w, GALR1 - galanin receptor 1, GALR3 - g…
GO:0002685	regulation of leukocyte migration	0.000297	0.0214	1.63	14437	133	2998	45	[TRPV4 - transient receptor potential cation channel, subfamily v, member 4, ITGA4 - integrin, alpha 4 (antigen cd49d, alpha 4 subunit of vla-4 receptor), CMKLR1 - chemokine-like receptor 1, CXCL9 - chemokine (c-x-c motif) ligand 9, ITGA2 - integrin, alpha 2 (cd49b, alpha 2 subunit of vla-2 receptor), CXCL12 - chemokine (c-x-c motif) ligand 12, CCR1 - chemokine (c-c motif) receptor 1, IL12A - int…
GO:0001817	regulation of cytokine production	0.000302	0.0217	1.31	14437	484	2998	132	[LILRB2 - leukocyte immunoglobulin-like receptor, subfamily b (with tm and itim domains), member 2, DHX58 - dexh (asp-glu-x-his) box polypeptide 58, SASH3 - sam and sh3 domain containing 3, FN1 - fibronectin 1, BIRC3 - baculoviral iap repeat containing 3, CD244 - cd244 molecule, natural killer cell receptor 2b4, DDIT3 - dna-damage-inducible transcript 3, TREX1 - three prime repair exonuclease 1, …
GO:0043032	positive regulation of macrophage activation	0.000308	0.022	3.5	14437	11	2998	8	[IL10 - interleukin 10, THBS1 - thrombospondin 1, STAP1 - signal transducing adaptor family member 1, IL33 - interleukin 33, LBP - lipopolysaccharide binding protein, IL1RL1 - interleukin 1 receptor-like 1, WNT5A - wingless-type mmtv integration site family, member 5a, HAVCR2 - hepatitis a virus cellular receptor 2]
GO:0006812	cation transport	0.00031	0.022	1.28	14437	586	2998	156	[FAM26E - family with sequence similarity 26, member e, SLC4A10 - solute carrier family 4, sodium bicarbonate transporter, member 10, DDIT3 - dna-damage-inducible transcript 3, CATSPER2 - cation channel, sperm associated 2, SLC34A3 - solute carrier family 34 (type ii sodium/phosphate contransporter), member 3, TTYH1 - tweety homolog 1 (drosophila), HEPH - hephaestin, TRPC3 - transient receptor po…
GO:0035456	response to interferon-beta	0.000317	0.0224	2.61	14437	24	2998	13	[IFITM1 - interferon induced transmembrane protein 1, IFITM3 - interferon induced transmembrane protein 3, PNPT1 - polyribonucleotide nucleotidyltransferase 1, STAT1 - signal transducer and activator of transcription 1, 91kda, IRGM - immunity-related gtpase family, m, PLSCR1 - phospholipid scramblase 1, XAF1 - xiap associated factor 1, BST2 - bone marrow stromal cell antigen 2, TMEM173 - transmem…
GO:0051282	regulation of sequestering of calcium ion	0.000325	0.0229	1.79	14437	86	2998	32	[GSTM2 - glutathione s-transferase mu 2 (muscle), CCR5 - chemokine (c-c motif) receptor 5 (gene/pseudogene), DDIT3 - dna-damage-inducible transcript 3, KIAA1199 - kiaa1199, ATP1A2 - atpase, na+/k+ transporting, alpha 2 polypeptide, SLC8A1 - solute carrier family 8 (sodium/calcium exchanger), member 1, CXCL9 - chemokine (c-x-c motif) ligand 9, CAMK2D - calcium/calmodulin-dependent protein kinase i…
GO:0042327	positive regulation of phosphorylation	0.000333	0.0233	1.24	14437	759	2998	196	[EMP2 - epithelial membrane protein 2, GFRA2 - gdnf family receptor alpha 2, SEMA4C - sema domain, immunoglobulin domain (ig), transmembrane domain (tm) and short cytoplasmic domain, (semaphorin) 4c, CARD14 - caspase recruitment domain family, member 14, PROK1 - prokineticin 1, GCNT2 - glucosaminyl (n-acetyl) transferase 2, i-branching enzyme (i blood group), FGF18 - fibroblast growth factor 18, …
GO:1905521	regulation of macrophage migration	0.00034	0.0236	3.01	14437	16	2998	10	[TRPV4 - transient receptor potential cation channel, subfamily v, member 4, CSF1 - colony stimulating factor 1 (macrophage), SLAMF1 - signaling lymphocytic activation molecule family member 1, THBS1 - thrombospondin 1, CMKLR1 - chemokine-like receptor 1, STAP1 - signal transducing adaptor family member 1, CCL5 - chemokine (c-c motif) ligand 5, C5 - complement component 5, TNFSF18 - tumor necrosi…
GO:0032330	regulation of chondrocyte differentiation	0.000343	0.0238	2.27	14437	36	2998	17	[ADAMTS12 - adam metallopeptidase with thrombospondin type 1 motif, 12, TGFBR1 - transforming growth factor, beta receptor 1, HOXA11 - homeobox a11, SOX6 - sry (sex determining region y)-box 6, SHOX2 - short stature homeobox 2, SIX2 - six homeobox 2, SNAI2 - snail family zinc finger 2, POR - p450 (cytochrome) oxidoreductase, CHADL - chondroadherin-like, CTGF - connective tissue growth factor, RAR…
GO:0030003	cellular cation homeostasis	0.000357	0.0246	1.34	14437	402	2998	112	[OPRL1 - opiate receptor-like 1, SLC4A10 - solute carrier family 4, sodium bicarbonate transporter, member 10, SYPL2 - synaptophysin-like 2, BNIP3 - bcl2/adenovirus e1b 19kda interacting protein 3, GALR2 - galanin receptor 2, GPR55 - g protein-coupled receptor 55, DDIT3 - dna-damage-inducible transcript 3, CXCL12 - chemokine (c-x-c motif) ligand 12, HEPH - hephaestin, SLC9C2 - solute carrier fami…
GO:0051047	positive regulation of secretion	0.000362	0.0248	1.42	14437	279	2998	82	[OPRL1 - opiate receptor-like 1, TRPV4 - transient receptor potential cation channel, subfamily v, member 4, PLA2R1 - phospholipase a2 receptor 1, 180kda, CHRNB2 - cholinergic receptor, nicotinic, beta 2 (neuronal), CD244 - cd244 molecule, natural killer cell receptor 2b4, SLC6A4 - solute carrier family 6 (neurotransmitter transporter), member 4, EXPH5 - exophilin 5, NNAT - neuronatin, NLGN2 - ne…
GO:0006140	regulation of nucleotide metabolic process	0.000365	0.0249	1.57	14437	153	2998	50	[OPRL1 - opiate receptor-like 1, GALR2 - galanin receptor 2, NOS2 - nitric oxide synthase 2, inducible, CXCL9 - chemokine (c-x-c motif) ligand 9, PGAM2 - phosphoglycerate mutase 2 (muscle), CDA - cytidine deaminase, GPD1 - glycerol-3-phosphate dehydrogenase 1 (soluble), CHGA - chromogranin a (parathyroid secretory protein 1), PID1 - phosphotyrosine interaction domain containing 1, HDAC4 - histone…
GO:0045471	response to ethanol	0.000371	0.0252	1.8	14437	83	2998	31	[CDK1 - cyclin-dependent kinase 1, CHRNB2 - cholinergic receptor, nicotinic, beta 2 (neuronal), STAR - steroidogenic acute regulatory protein, TJP1 - tight junction protein 1, CYP2E1 - cytochrome p450, family 2, subfamily e, polypeptide 1, TNC - tenascin c, ABAT - 4-aminobutyrate aminotransferase, NTRK1 - neurotrophic tyrosine kinase, receptor, type 1, CD14 - cd14 molecule, SPARC - secreted prote…
GO:0050715	positive regulation of cytokine secretion	0.000374	0.0253	1.84	14437	76	2998	29	[TRPV4 - transient receptor potential cation channel, subfamily v, member 4, FFAR2 - free fatty acid receptor 2, CD244 - cd244 molecule, natural killer cell receptor 2b4, CD274 - cd274 molecule, RGCC - regulator of cell cycle, CD58 - cd58 molecule, CD14 - cd14 molecule, AIM2 - absent in melanoma 2, CRTAM - cytotoxic and regulatory t cell molecule, SLAMF1 - signaling lymphocytic activation molecul…
GO:0006873	cellular ion homeostasis	0.000382	0.0257	1.34	14437	411	2998	114	[OPRL1 - opiate receptor-like 1, SLC4A10 - solute carrier family 4, sodium bicarbonate transporter, member 10, SYPL2 - synaptophysin-like 2, BNIP3 - bcl2/adenovirus e1b 19kda interacting protein 3, GALR2 - galanin receptor 2, GPR55 - g protein-coupled receptor 55, DDIT3 - dna-damage-inducible transcript 3, CXCL12 - chemokine (c-x-c motif) ligand 12, SLC34A3 - solute carrier family 34 (type ii sod…
GO:0043435	response to corticotropin-releasing hormone	0.000385	0.0258	4.82	14437	5	2998	5	[CRHR2 - corticotropin releasing hormone receptor 2, CRHR1 - corticotropin releasing hormone receptor 1, NR4A2 - nuclear receptor subfamily 4, group a, member 2, NR4A3 - nuclear receptor subfamily 4, group a, member 3, NR4A1 - nuclear receptor subfamily 4, group a, member 1]
GO:0002730	regulation of dendritic cell cytokine production	0.000385	0.0257	4.82	14437	5	2998	5	[BST2 - bone marrow stromal cell antigen 2, JAK3 - janus kinase 3, TLR3 - toll-like receptor 3, TLR4 - toll-like receptor 4, NOD2 - nucleotide-binding oligomerization domain containing 2]
GO:0071313	cellular response to caffeine	0.000385	0.0255	4.82	14437	5	2998	5	[GSTM2 - glutathione s-transferase mu 2 (muscle), RYR3 - ryanodine receptor 3, PPARGC1A - peroxisome proliferator-activated receptor gamma, coactivator 1 alpha, SLC8A1 - solute carrier family 8 (sodium/calcium exchanger), member 1, RYR1 - ryanodine receptor 1 (skeletal)]
GO:0071376	cellular response to corticotropin-releasing hormone stimulus	0.000385	0.0254	4.82	14437	5	2998	5	[CRHR2 - corticotropin releasing hormone receptor 2, CRHR1 - corticotropin releasing hormone receptor 1, NR4A2 - nuclear receptor subfamily 4, group a, member 2, NR4A3 - nuclear receptor subfamily 4, group a, member 3, NR4A1 - nuclear receptor subfamily 4, group a, member 1]
GO:0010759	positive regulation of macrophage chemotaxis	0.0004	0.0263	3.75	14437	9	2998	7	[CSF1 - colony stimulating factor 1 (macrophage), TRPV4 - transient receptor potential cation channel, subfamily v, member 4, SLAMF1 - signaling lymphocytic activation molecule family member 1, CMKLR1 - chemokine-like receptor 1, THBS1 - thrombospondin 1, CCL5 - chemokine (c-c motif) ligand 5, TNFSF18 - tumor necrosis factor (ligand) superfamily, member 18]
GO:1900542	regulation of purine nucleotide metabolic process	0.000406	0.0265	1.58	14437	146	2998	48	[OPRL1 - opiate receptor-like 1, DDIT4 - dna-damage-inducible transcript 4, GALR2 - galanin receptor 2, LTB4R2 - leukotriene b4 receptor 2, NOS2 - nitric oxide synthase 2, inducible, MRAP2 - melanocortin 2 receptor accessory protein 2, CXCL9 - chemokine (c-x-c motif) ligand 9, GALR1 - galanin receptor 1, AVPR2 - arginine vasopressin receptor 2, PPARGC1A - peroxisome proliferator-activated recepto…
GO:0071222	cellular response to lipopolysaccharide	0.000408	0.0266	1.7	14437	105	2998	37	[CCR5 - chemokine (c-c motif) receptor 5 (gene/pseudogene), LILRB2 - leukocyte immunoglobulin-like receptor, subfamily b (with tm and itim domains), member 2, GFI1 - growth factor independent 1 transcription repressor, STAR - steroidogenic acute regulatory protein, NOS2 - nitric oxide synthase 2, inducible, ADAMTS13 - adam metallopeptidase with thrombospondin type 1 motif, 13, IL12B - interleukin…
GO:0051094	positive regulation of developmental process	0.000418	0.0271	1.21	14437	937	2998	236	[GFAP - glial fibrillary acidic protein, LILRB2 - leukocyte immunoglobulin-like receptor, subfamily b (with tm and itim domains), member 2, BNIP3 - bcl2/adenovirus e1b 19kda interacting protein 3, HSF4 - heat shock transcription factor 4, KIF20B - kinesin family member 20b, TNFRSF12A - tumor necrosis factor receptor superfamily, member 12a, BRCA1 - breast cancer 1, early onset, PLD6 - phospholipa…
GO:0050789	regulation of biological process	0.00043	0.0277	1.05	14437	8435	2998	1832	[BMP2K - bmp2 inducible kinase, ABAT - 4-aminobutyrate aminotransferase, CATSPER2 - cation channel, sperm associated 2, ANKRD10 - ankyrin repeat domain 10, SEPT4 - septin 4, PODXL - podocalyxin-like, SH2D1B - sh2 domain containing 1b, PLXNB3 - plexin b3, WFIKKN1 - wap, follistatin/kazal, immunoglobulin, kunitz and netrin domain containing 1, PMCH - pro-melanin-concentrating hormone, PMAIP1 - phor…
amily 1 (neuronal/epithelial high affinity glutamate transporter, system xag), member 1, DUSP4 - dual specificity phosphatase 4, SKI - v-ski avian sarcoma viral oncogene homolog, DUSP5 - dual specificity phosphatase 5, DUSP6 - dual specificity phosphatase 6, ZNF724P - zinc finger protein 724, pseudogene, STON2 - stonin 2, GPR179 - g protein-coupled receptor 179, FNIP2 - folliculin interacting pro…
tumor necrosis factor receptor superfamily, member 12a, PITPNM1 - phosphatidylinositol transfer protein, membrane-associated 1, LIFR - leukemia inhibitory factor receptor alpha, CARD11 - caspase recruitment domain family, member 11, PROK1 - prokineticin 1, LDLR - low density lipoprotein receptor, KLF14 - kruppel-like factor 14, TLR8 - toll-like receptor 8, LGALS3 - lectin, galactoside-binding, so…
GO:0001819	positive regulation of cytokine production	0.000432	0.0278	1.38	14437	313	2998	90	[TRPV4 - transient receptor potential cation channel, subfamily v, member 4, LILRB2 - leukocyte immunoglobulin-like receptor, subfamily b (with tm and itim domains), member 2, DHX58 - dexh (asp-glu-x-his) box polypeptide 58, SASH3 - sam and sh3 domain containing 3, IFI16 - interferon, gamma-inducible protein 16, HLA-G - major histocompatibility complex, class i, g, CD244 - cd244 molecule, natural…
GO:0002251	organ or tissue specific immune response	0.000433	0.0277	2.79	14437	19	2998	11	[FFAR2 - free fatty acid receptor 2, HIST1H2BC - histone cluster 1, h2bc, IFNLR1 - interferon, lambda receptor 1, HIST2H2BE - histone cluster 2, h2be, NOS2 - nitric oxide synthase 2, inducible, HIST1H2BJ - histone cluster 1, h2bj, HIST1H2BF - histone cluster 1, h2bf, CAMP - cathelicidin antimicrobial peptide, HIST1H2BG - histone cluster 1, h2bg, IL6 - interleukin 6 (interferon, beta 2), LTF - lac…
GO:0050926	regulation of positive chemotaxis	0.000433	0.0276	2.79	14437	19	2998	11	[KDR - kinase insert domain receptor (a type iii receptor tyrosine kinase), FIGF - c-fos induced growth factor (vascular endothelial growth factor d), VEGFA - vascular endothelial growth factor a, SCG2 - secretogranin ii, S1PR1 - sphingosine-1-phosphate receptor 1, FGF10 - fibroblast growth factor 10, ARTN - artemin, ITGA2 - integrin, alpha 2 (cd49b, alpha 2 subunit of vla-2 receptor), CXCL12 - c…
GO:0055080	cation homeostasis	0.000435	0.0275	1.32	14437	450	2998	123	[OPRL1 - opiate receptor-like 1, SLC4A10 - solute carrier family 4, sodium bicarbonate transporter, member 10, SYPL2 - synaptophysin-like 2, BNIP3 - bcl2/adenovirus e1b 19kda interacting protein 3, GALR2 - galanin receptor 2, TMTC2 - transmembrane and tetratricopeptide repeat containing 2, TRIM24 - tripartite motif containing 24, GPR55 - g protein-coupled receptor 55, DDIT3 - dna-damage-inducible…
GO:0045667	regulation of osteoblast differentiation	0.000456	0.0287	1.75	14437	91	2998	33	[IFITM1 - interferon induced transmembrane protein 1, TOB1 - transducer of erbb2, 1, ACVR2A - activin a receptor, type iia, TMEM119 - transmembrane protein 119, ACVR1 - activin a receptor, type i, WNT10B - wingless-type mmtv integration site family, member 10b, GLI1 - gli family zinc finger 1, RASSF2 - ras association (ralgds/af-6) domain family member 2, FAM20C - family with sequence similarity …
GO:0032230	positive regulation of synaptic transmission, GABAergic	0.00046	0.0289	4.13	14437	7	2998	6	[CA2 - carbonic anhydrase ii, PRKCE - protein kinase c, epsilon, ADORA2A - adenosine a2a receptor, NLGN2 - neuroligin 2, OXTR - oxytocin receptor, HAP1 - huntingtin-associated protein 1]
GO:0055082	cellular chemical homeostasis	0.000475	0.0297	1.31	14437	472	2998	128	[OPRL1 - opiate receptor-like 1, SLC4A10 - solute carrier family 4, sodium bicarbonate transporter, member 10, SYPL2 - synaptophysin-like 2, BNIP3 - bcl2/adenovirus e1b 19kda interacting protein 3, GALR2 - galanin receptor 2, GPR55 - g protein-coupled receptor 55, DDIT3 - dna-damage-inducible transcript 3, MIP - major intrinsic protein of lens fiber, CXCL12 - chemokine (c-x-c motif) ligand 12, SL…
GO:0044763	single-organism cellular process	0.000476	0.0296	1.06	14437	7074	2998	1550	[ABAT - 4-aminobutyrate aminotransferase, CATSPER2 - cation channel, sperm associated 2, SEPT4 - septin 4, PODXL - podocalyxin-like, SH2D1B - sh2 domain containing 1b, PLXNB3 - plexin b3, WFIKKN1 - wap, follistatin/kazal, immunoglobulin, kunitz and netrin domain containing 1, PMCH - pro-melanin-concentrating hormone, PMAIP1 - phorbol-12-myristate-13-acetate-induced protein 1, PNOC - prepronocicep…
lin receptor type b, KCNG4 - potassium voltage-gated channel, subfamily g, member 4, TRAF1 - tnf receptor-associated factor 1, S1PR1 - sphingosine-1-phosphate receptor 1, S1PR3 - sphingosine-1-phosphate receptor 3, EDA - ectodysplasin a, PAK6 - p21 protein (cdc42/rac)-activated kinase 6, TYMP - thymidine phosphorylase, C17orf104 - chromosome 17 open reading frame 104, NUP210L - nucleoporin 210kda…
FSF18 - tumor necrosis factor (ligand) superfamily, member 18, NOL3 - nucleolar protein 3 (apoptosis repressor with card domain), KALRN - kalirin, rhogef kinase, HAP1 - huntingtin-associated protein 1, F2RL3 - coagulation factor ii (thrombin) receptor-like 3, MAG - myelin associated glycoprotein, ROPN1L - rhophilin associated tail protein 1-like, KIF18B - kinesin family member 18b, HIST1H2AG - hi…
GO:0050906	detection of stimulus involved in sensory perception	0.000481	0.0298	1.86	14437	70	2998	27	[TAS2R20 - taste receptor, type 2, member 20, KIAA1045 - kiaa1045, OR1F1 - olfactory receptor, family 1, subfamily f, member 1, OR9A4 - olfactory receptor, family 9, subfamily a, member 4, ITGA2 - integrin, alpha 2 (cd49b, alpha 2 subunit of vla-2 receptor), NTRK1 - neurotrophic tyrosine kinase, receptor, type 1, RTP4 - receptor (chemosensory) transporter protein 4, PKD2L1 - polycystic kidney dis…
GO:0007062	sister chromatid cohesion	0.000504	0.0311	1.68	14437	106	2998	37	[DSN1 - dsn1, mis12 kinetochore complex component, CENPA - centromere protein a, CDC20 - cell division cycle 20, ERCC6L - excision repair cross-complementing rodent repair deficiency, complementation group 6-like, BIRC5 - baculoviral iap repeat containing 5, ITGB3BP - integrin beta 3 binding protein (beta3-endonexin), CENPE - centromere protein e, 312kda, CENPM - centromere protein m, NUF2 - nuf2…
GO:0023051	regulation of signaling	0.000526	0.0323	1.12	14437	2543	2998	590	[GFAP - glial fibrillary acidic protein, GFI1 - growth factor independent 1 transcription repressor, NPAS4 - neuronal pas domain protein 4, GFRA2 - gdnf family receptor alpha 2, TNFRSF12A - tumor necrosis factor receptor superfamily, member 12a, ABAT - 4-aminobutyrate aminotransferase, GATSL3 - gats protein-like 3, SEPT4 - septin 4, ANKRD10 - ankyrin repeat domain 10, GDNF - glial cell derived ne…
GO:0000083	regulation of transcription involved in G1/S transition of mitotic cell cycle	0.000536	0.0328	2.5	14437	25	2998	13	[CDC6 - cell division cycle 6, ID2 - inhibitor of dna binding 2, dominant negative helix-loop-helix protein, GFI1 - growth factor independent 1 transcription repressor, CDK1 - cyclin-dependent kinase 1, ORC1 - origin recognition complex, subunit 1, CCNE1 - cyclin e1, CDT1 - chromatin licensing and dna replication factor 1, E2F1 - e2f transcription factor 1, CCNA1 - cyclin a1, POLA1 - polymerase (…
GO:0050678	regulation of epithelial cell proliferation	0.000549	0.0334	1.44	14437	230	2998	69	[VASH2 - vasohibin 2, FLT4 - fms-related tyrosine kinase 4, NME2 - nme/nm23 nucleoside diphosphate kinase 2, CXCL12 - chemokine (c-x-c motif) ligand 12, PTPRN - protein tyrosine phosphatase, receptor type, n, WNT10B - wingless-type mmtv integration site family, member 10b, PLXNB3 - plexin b3, KDR - kinase insert domain receptor (a type iii receptor tyrosine kinase), ESRP2 - epithelial splicing re…
GO:0006270	DNA replication initiation	0.000551	0.0334	2.33	14437	31	2998	15	[CDC6 - cell division cycle 6, POLA2 - polymerase (dna directed), alpha 2, accessory subunit, CCNE2 - cyclin e2, ORC1 - origin recognition complex, subunit 1, CCNE1 - cyclin e1, PRIM1 - primase, dna, polypeptide 1 (49kda), MCM4 - minichromosome maintenance complex component 4, MCM3 - minichromosome maintenance complex component 3, MCM10 - minichromosome maintenance complex component 10, ORC6 - or…
GO:0019233	sensory perception of pain	0.000551	0.0332	2.33	14437	31	2998	15	[OPRL1 - opiate receptor-like 1, KCNA2 - potassium voltage-gated channel, shaker-related subfamily, member 2, BDKRB1 - bradykinin receptor b1, PROK2 - prokineticin 2, P2RX7 - purinergic receptor p2x, ligand-gated ion channel, 7, CHRNB2 - cholinergic receptor, nicotinic, beta 2 (neuronal), MME - membrane metallo-endopeptidase, PENK - proenkephalin, NLGN2 - neuroligin 2, SCN3B - sodium channel, vol…
GO:0098771	inorganic ion homeostasis	0.000553	0.0332	1.31	14437	461	2998	125	[OPRL1 - opiate receptor-like 1, SLC4A10 - solute carrier family 4, sodium bicarbonate transporter, member 10, BNIP3 - bcl2/adenovirus e1b 19kda interacting protein 3, SYPL2 - synaptophysin-like 2, GALR2 - galanin receptor 2, TMTC2 - transmembrane and tetratricopeptide repeat containing 2, TRIM24 - tripartite motif containing 24, GPR55 - g protein-coupled receptor 55, DDIT3 - dna-damage-inducible…
GO:1900371	regulation of purine nucleotide biosynthetic process	0.000571	0.0342	1.73	14437	92	2998	33	[OPRL1 - opiate receptor-like 1, GALR2 - galanin receptor 2, LTB4R2 - leukotriene b4 receptor 2, NOS2 - nitric oxide synthase 2, inducible, MRAP2 - melanocortin 2 receptor accessory protein 2, GALR1 - galanin receptor 1, PPARGC1A - peroxisome proliferator-activated receptor gamma, coactivator 1 alpha, AVPR2 - arginine vasopressin receptor 2, HTR1B - 5-hydroxytryptamine (serotonin) receptor 1b, g …
GO:0006814	sodium ion transport	0.000571	0.034	1.73	14437	92	2998	33	[FXYD2 - fxyd domain containing ion transport regulator 2, SLC4A10 - solute carrier family 4, sodium bicarbonate transporter, member 10, FGF13 - fibroblast growth factor 13, KLHL3 - kelch-like family member 3, SCN1B - sodium channel, voltage-gated, type i, beta subunit, WNK4 - wnk lysine deficient protein kinase 4, ATP1A2 - atpase, na+/k+ transporting, alpha 2 polypeptide, SLC8A1 - solute carrier…
GO:0006950	response to stress	0.000587	0.0348	1.12	14437	2288	2998	534	[GFAP - glial fibrillary acidic protein, WDR76 - wd repeat domain 76, ABAT - 4-aminobutyrate aminotransferase, SH2D1B - sh2 domain containing 1b, CHAF1B - chromatin assembly factor 1, subunit b (p60), PMAIP1 - phorbol-12-myristate-13-acetate-induced protein 1, PML - promyelocytic leukemia, SPARC - secreted protein, acidic, cysteine-rich (osteonectin), TLR8 - toll-like receptor 8, IFI44L - interfe…
GO:0045740	positive regulation of DNA replication	0.000587	0.0347	2.05	14437	47	2998	20	[SHC1 - shc (src homology 2 domain containing) transforming protein 1, IGF1R - insulin-like growth factor 1 receptor, CDK1 - cyclin-dependent kinase 1, EREG - epiregulin, IGF1 - insulin-like growth factor 1 (somatomedin c), FGF10 - fibroblast growth factor 10, JUN - jun proto-oncogene, AREG - amphiregulin, MAS1 - mas1 oncogene, E2F8 - e2f transcription factor 8, NPM2 - nucleophosmin/nucleoplasmin…
GO:0030574	collagen catabolic process	0.000656	0.0386	1.96	14437	54	2998	22	[CTSL - cathepsin l, CTSK - cathepsin k, MMP1 - matrix metallopeptidase 1 (interstitial collagenase), MMP7 - matrix metallopeptidase 7 (matrilysin, uterine), ADAMTS3 - adam metallopeptidase with thrombospondin type 1 motif, 3, COL6A2 - collagen, type vi, alpha 2, COL6A3 - collagen, type vi, alpha 3, MMP3 - matrix metallopeptidase 3 (stromelysin 1, progelatinase), COL4A2 - collagen, type iv, alpha…
GO:0044767	single-organism developmental process	0.000658	0.0386	1.1	14437	3286	2998	749	[GFAP - glial fibrillary acidic protein, MDGA1 - mam domain containing glycosylphosphatidylinositol anchor 1, LHB - luteinizing hormone beta polypeptide, SPTA1 - spectrin, alpha, erythrocytic 1 (elliptocytosis 2), GFI1 - growth factor independent 1 transcription repressor, NPAS4 - neuronal pas domain protein 4, KIF20B - kinesin family member 20b, TNFRSF12A - tumor necrosis factor receptor superfa…
- platelet derived growth factor d, BCAR3 - breast cancer anti-estrogen resistance 3, CLU - clusterin, NFIA - nuclear factor i/a, FOXD3 - forkhead box d3, SLC39A5 - solute carrier family 39 (zinc transporter), member 5, TGFBR1 - transforming growth factor, beta receptor 1, FFAR4 - free fatty acid receptor 4, NPHP3 - nephronophthisis 3 (adolescent), SCUBE1 - signal peptide, cub domain, egf-like 1,…
GO:0002385	mucosal immune response	0.000672	0.0392	2.83	14437	17	2998	10	[FFAR2 - free fatty acid receptor 2, HIST1H2BC - histone cluster 1, h2bc, IFNLR1 - interferon, lambda receptor 1, HIST2H2BE - histone cluster 2, h2be, NOS2 - nitric oxide synthase 2, inducible, HIST1H2BJ - histone cluster 1, h2bj, HIST1H2BF - histone cluster 1, h2bf, CAMP - cathelicidin antimicrobial peptide, HIST1H2BG - histone cluster 1, h2bg, LTF - lactotransferrin]
GO:0014059	regulation of dopamine secretion	0.000672	0.0391	2.83	14437	17	2998	10	[KCNA2 - potassium voltage-gated channel, shaker-related subfamily, member 2, PINK1 - pten induced putative kinase 1, CHRNB2 - cholinergic receptor, nicotinic, beta 2 (neuronal), HTR1B - 5-hydroxytryptamine (serotonin) receptor 1b, g protein-coupled, ABAT - 4-aminobutyrate aminotransferase, FGF20 - fibroblast growth factor 20, CHRNA6 - cholinergic receptor, nicotinic, alpha 6 (neuronal), CXCL12 -…
GO:0097305	response to alcohol	0.000692	0.04	1.63	14437	115	2998	39	[CYP7A1 - cytochrome p450, family 7, subfamily a, polypeptide 1, CCR5 - chemokine (c-c motif) receptor 5 (gene/pseudogene), CDK1 - cyclin-dependent kinase 1, CHRNB2 - cholinergic receptor, nicotinic, beta 2 (neuronal), STAR - steroidogenic acute regulatory protein, TJP1 - tight junction protein 1, TNC - tenascin c, CYP2E1 - cytochrome p450, family 2, subfamily e, polypeptide 1, BRCA1 - breast can…
GO:1903524	positive regulation of blood circulation	0.000696	0.0401	1.89	14437	61	2998	24	[SLC1A1 - solute carrier family 1 (neuronal/epithelial high affinity glutamate transporter, system xag), member 1, CD38 - cd38 molecule, TGFB2 - transforming growth factor, beta 2, CPS1 - carbamoyl-phosphate synthase 1, mitochondrial, NOS2 - nitric oxide synthase 2, inducible, RNF207 - ring finger protein 207, ADRA2C - adrenoceptor alpha 2c, SCN3B - sodium channel, voltage-gated, type iii, beta s…
GO:0031644	regulation of neurological system process	0.000697	0.04	2.11	14437	41	2998	18	[OPRL1 - opiate receptor-like 1, MGLL - monoglyceride lipase, MYRF - myelin regulatory factor, ADRA2C - adrenoceptor alpha 2c, GRM1 - glutamate receptor, metabotropic 1, ITGA2 - integrin, alpha 2 (cd49b, alpha 2 subunit of vla-2 receptor), CCL3 - chemokine (c-c motif) ligand 3, TNFRSF21 - tumor necrosis factor receptor superfamily, member 21, HGF - hepatocyte growth factor (hepapoietin a; scatter…
GO:0044259	multicellular organismal macromolecule metabolic process	0.00071	0.0406	1.84	14437	68	2998	26	[AKR1C3 - aldo-keto reductase family 1, member c3, ADAMTS3 - adam metallopeptidase with thrombospondin type 1 motif, 3, PRTN3 - proteinase 3, ACE - angiotensin i converting enzyme, COL4A1 - collagen, type iv, alpha 1, CTSL - cathepsin l, MMP1 - matrix metallopeptidase 1 (interstitial collagenase), CTSK - cathepsin k, MMP7 - matrix metallopeptidase 7 (matrilysin, uterine), COL6A2 - collagen, type …
GO:0030808	regulation of nucleotide biosynthetic process	0.000711	0.0405	1.71	14437	93	2998	33	[OPRL1 - opiate receptor-like 1, GALR2 - galanin receptor 2, LTB4R2 - leukotriene b4 receptor 2, NOS2 - nitric oxide synthase 2, inducible, MRAP2 - melanocortin 2 receptor accessory protein 2, GALR1 - galanin receptor 1, PPARGC1A - peroxisome proliferator-activated receptor gamma, coactivator 1 alpha, AVPR2 - arginine vasopressin receptor 2, ADCY6 - adenylate cyclase 6, HTR1B - 5-hydroxytryptamin…
GO:0007155	cell adhesion	0.000713	0.0405	1.19	14437	1025	2998	254	[CD93 - cd93 molecule, EMP2 - epithelial membrane protein 2, LILRB2 - leukocyte immunoglobulin-like receptor, subfamily b (with tm and itim domains), member 2, CLDN23 - claudin 23, SVEP1 - sushi, von willebrand factor type a, egf and pentraxin domain containing 1, TNFRSF12A - tumor necrosis factor receptor superfamily, member 12a, SPOCK1 - sparc/osteonectin, cwcv and kazal-like domains proteoglyc…
GO:0065007	biological regulation	0.000723	0.0408	1.04	14437	8910	2998	1926	[BMP2K - bmp2 inducible kinase, AANAT - aralkylamine n-acetyltransferase, ABAT - 4-aminobutyrate aminotransferase, CATSPER2 - cation channel, sperm associated 2, ANKRD10 - ankyrin repeat domain 10, SEPT4 - septin 4, PODXL - podocalyxin-like, SH2D1B - sh2 domain containing 1b, PLXNB3 - plexin b3, WFIKKN1 - wap, follistatin/kazal, immunoglobulin, kunitz and netrin domain containing 1, PMCH - pro-me…
- zinc finger protein 286b, TENM4 - teneurin transmembrane protein 4, TICRR - topbp1-interacting checkpoint and replication regulator, RNF144B - ring finger protein 144b, SCNN1A - sodium channel, non-voltage-gated 1 alpha subunit, S100A12 - s100 calcium binding protein a12, S100B - s100 calcium binding protein b, CASKIN2 - cask interacting protein 2, GPR158 - g protein-coupled receptor 158, DAZL …
nteracting protein 3, IRF5 - interferon regulatory factor 5, PPAP2B - phosphatidic acid phosphatase type 2b, TNFSF11 - tumor necrosis factor (ligand) superfamily, member 11, ARHGAP9 - rho gtpase activating protein 9, NXN - nucleoredoxin, SP110 - sp110 nuclear body protein, HIST1H3D - histone cluster 1, h3d, IFIT2 - interferon-induced protein with tetratricopeptide repeats 2, GRID2IP - glutamate r…
GO:0048878	chemical homeostasis	0.000731	0.0411	1.24	14437	709	2998	182	[OPRL1 - opiate receptor-like 1, BNIP3 - bcl2/adenovirus e1b 19kda interacting protein 3, SYPL2 - synaptophysin-like 2, SLC4A10 - solute carrier family 4, sodium bicarbonate transporter, member 10, GALR2 - galanin receptor 2, TMTC2 - transmembrane and tetratricopeptide repeat containing 2, TRIM24 - tripartite motif containing 24, GPR55 - g protein-coupled receptor 55, DDIT3 - dna-damage-inducible…
GO:0002718	regulation of cytokine production involved in immune response	0.000731	0.041	1.98	14437	51	2998	21	[RSAD2 - radical s-adenosyl methionine domain containing 2, SLAMF1 - signaling lymphocytic activation molecule family member 1, FFAR2 - free fatty acid receptor 2, SASH3 - sam and sh3 domain containing 3, TGFB2 - transforming growth factor, beta 2, FZD5 - frizzled family receptor 5, GATA3 - gata binding protein 3, WNT5A - wingless-type mmtv integration site family, member 5a, CD96 - cd96 molecule…
GO:0010646	regulation of cell communication	0.000758	0.0423	1.11	14437	2506	2998	580	[GFAP - glial fibrillary acidic protein, GFI1 - growth factor independent 1 transcription repressor, NPAS4 - neuronal pas domain protein 4, GFRA2 - gdnf family receptor alpha 2, TNFRSF12A - tumor necrosis factor receptor superfamily, member 12a, ABAT - 4-aminobutyrate aminotransferase, GATSL3 - gats protein-like 3, ANKRD10 - ankyrin repeat domain 10, SEPT4 - septin 4, GDNF - glial cell derived ne…
GO:0035725	sodium ion transmembrane transport	0.000784	0.0436	1.91	14437	58	2998	23	[FXYD2 - fxyd domain containing ion transport regulator 2, SLC24A4 - solute carrier family 24 (sodium/potassium/calcium exchanger), member 4, SLC9A9 - solute carrier family 9, subfamily a (nhe9, cation proton antiporter 9), member 9, ASIC1 - acid-sensing (proton-gated) ion channel 1, SCN1B - sodium channel, voltage-gated, type i, beta subunit, HCN2 - hyperpolarization activated cyclic nucleotide-…
GO:0006333	chromatin assembly or disassembly	0.000784	0.0434	1.77	14437	79	2998	29	[HIST1H3D - histone cluster 1, h3d, HIST1H3C - histone cluster 1, h3c, CENPA - centromere protein a, ITGB3BP - integrin beta 3 binding protein (beta3-endonexin), CENPM - centromere protein m, HIST1H4D - histone cluster 1, h4d, HIST1H1E - histone cluster 1, h1e, HIST1H1D - histone cluster 1, h1d, HIST1H4K - histone cluster 1, h4k, HIST1H1C - histone cluster 1, h1c, CENPK - centromere protein k, HI…
GO:0051174	regulation of phosphorus metabolic process	0.000793	0.0438	1.17	14437	1335	2998	323	[EMP2 - epithelial membrane protein 2, FAM83D - family with sequence similarity 83, member d, GALR2 - galanin receptor 2, GFRA2 - gdnf family receptor alpha 2, SEMA4C - sema domain, immunoglobulin domain (ig), transmembrane domain (tm) and short cytoplasmic domain, (semaphorin) 4c, CARD14 - caspase recruitment domain family, member 14, SPINK1 - serine peptidase inhibitor, kazal type 1, PROK1 - pr…
GO:0022610	biological adhesion	0.000804	0.0442	1.19	14437	1027	2998	254	[CD93 - cd93 molecule, EMP2 - epithelial membrane protein 2, LILRB2 - leukocyte immunoglobulin-like receptor, subfamily b (with tm and itim domains), member 2, CLDN23 - claudin 23, SVEP1 - sushi, von willebrand factor type a, egf and pentraxin domain containing 1, TNFRSF12A - tumor necrosis factor receptor superfamily, member 12a, SPOCK1 - sparc/osteonectin, cwcv and kazal-like domains proteoglyc…
GO:0098754	detoxification	0.000804	0.044	1.81	14437	72	2998	27	[GSTM2 - glutathione s-transferase mu 2 (muscle), CYGB - cytoglobin, GSR - glutathione reductase, GPX3 - glutathione peroxidase 3 (plasma), IPCEF1 - interaction protein for cytohesin exchange factors 1, EPX - eosinophil peroxidase, UBIAD1 - ubia prenyltransferase domain containing 1, TXNDC2 - thioredoxin domain containing 2 (spermatozoa), TXNRD1 - thioredoxin reductase 1, LTC4S - leukotriene c4 s…
GO:0050793	regulation of developmental process	0.000812	0.0443	1.14	14437	1838	2998	434	[GFAP - glial fibrillary acidic protein, BMP2K - bmp2 inducible kinase, SPTA1 - spectrin, alpha, erythrocytic 1 (elliptocytosis 2), GFI1 - growth factor independent 1 transcription repressor, KIF20B - kinesin family member 20b, TNFRSF12A - tumor necrosis factor receptor superfamily, member 12a, SPOCK1 - sparc/osteonectin, cwcv and kazal-like domains proteoglycan (testican) 1, GDNF - glial cell de…
GO:0044702	single organism reproductive process	0.000816	0.0444	1.22	14437	776	2998	197	[LHB - luteinizing hormone beta polypeptide, EMP2 - epithelial membrane protein 2, SIX5 - six homeobox 5, HSF2 - heat shock transcription factor 2, CATSPER2 - cation channel, sperm associated 2, PLD6 - phospholipase d family, member 6, SEPT4 - septin 4, FOXL2 - forkhead box l2, DIAPH3 - diaphanous-related formin 3, PMCH - pro-melanin-concentrating hormone, TRPC3 - transient receptor potential cat…
GO:0002275	myeloid cell activation involved in immune response	0.000839	0.0454	2.26	14437	32	2998	15	[SLAMF1 - signaling lymphocytic activation molecule family member 1, IL33 - interleukin 33, LBP - lipopolysaccharide binding protein, CCL3 - chemokine (c-c motif) ligand 3, HAVCR2 - hepatitis a virus cellular receptor 2, ANXA3 - annexin a3, RASGRP1 - ras guanyl releasing protein 1 (calcium and dag-regulated), PIK3CD - phosphatidylinositol-4,5-bisphosphate 3-kinase, catalytic subunit delta, PRKCE …
GO:0048584	positive regulation of response to stimulus	0.000842	0.0454	1.15	14437	1607	2998	383	[TOB1 - transducer of erbb2, 1, EMP2 - epithelial membrane protein 2, GFI1 - growth factor independent 1 transcription repressor, BNIP3 - bcl2/adenovirus e1b 19kda interacting protein 3, DHX58 - dexh (asp-glu-x-his) box polypeptide 58, PLA2R1 - phospholipase a2 receptor 1, 180kda, TNFRSF12A - tumor necrosis factor receptor superfamily, member 12a, SEMA4C - sema domain, immunoglobulin domain (ig),…
GO:0007588	excretion	0.000845	0.0454	2.51	14437	23	2998	12	[KCNK5 - potassium channel, subfamily k, member 5, AVPR2 - arginine vasopressin receptor 2, AMN - amnion associated transmembrane protein, CLCNKA - chloride channel, voltage-sensitive ka, NEDD4L - neural precursor cell expressed, developmentally down-regulated 4-like, e3 ubiquitin protein ligase, AQP7 - aquaporin 7, NPHP1 - nephronophthisis 1 (juvenile), MDK - midkine (neurite growth-promoting fa…
GO:0071396	cellular response to lipid	0.000851	0.0455	1.39	14437	278	2998	80	[AKR1C3 - aldo-keto reductase family 1, member c3, LILRB2 - leukocyte immunoglobulin-like receptor, subfamily b (with tm and itim domains), member 2, GFI1 - growth factor independent 1 transcription repressor, NPAS4 - neuronal pas domain protein 4, NOS2 - nitric oxide synthase 2, inducible, SLC6A4 - solute carrier family 6 (neurotransmitter transporter), member 4, ATP1A2 - atpase, na+/k+ transpor…
GO:0006937	regulation of muscle contraction	0.000869	0.0463	1.65	14437	105	2998	36	[ARHGAP42 - rho gtpase activating protein 42, GSTM2 - glutathione s-transferase mu 2 (muscle), ATP2A1 - atpase, ca++ transporting, cardiac muscle, fast twitch 1, PROK2 - prokineticin 2, RNF207 - ring finger protein 207, CHRNA3 - cholinergic receptor, nicotinic, alpha 3 (neuronal), ADRA2C - adrenoceptor alpha 2c, ATP1A2 - atpase, na+/k+ transporting, alpha 2 polypeptide, SLC8A1 - solute carrier fa…
GO:0071312	cellular response to alkaloid	0.00087	0.0462	2.41	14437	26	2998	13	[GSTM2 - glutathione s-transferase mu 2 (muscle), RYR3 - ryanodine receptor 3, STAR - steroidogenic acute regulatory protein, BLM - bloom syndrome, recq helicase-like, SLC8A1 - solute carrier family 8 (sodium/calcium exchanger), member 1, NFKB1 - nuclear factor of kappa light polypeptide gene enhancer in b-cells 1, NTRK1 - neurotrophic tyrosine kinase, receptor, type 1, RYR1 - ryanodine receptor …
GO:0002687	positive regulation of leukocyte migration	0.000881	0.0466	1.69	14437	94	2998	33	[TRPV4 - transient receptor potential cation channel, subfamily v, member 4, ITGA4 - integrin, alpha 4 (antigen cd49d, alpha 4 subunit of vla-4 receptor), CMKLR1 - chemokine-like receptor 1, CXCL9 - chemokine (c-x-c motif) ligand 9, ITGA2 - integrin, alpha 2 (cd49b, alpha 2 subunit of vla-2 receptor), CXCL12 - chemokine (c-x-c motif) ligand 12, CCR1 - chemokine (c-c motif) receptor 1, IL12A - int…
GO:0035239	tube morphogenesis	0.000885	0.0467	1.49	14437	174	2998	54	[DCHS1 - dachsous 1 (drosophila), WNK4 - wnk lysine deficient protein kinase 4, GDNF - glial cell derived neurotrophic factor, SEMA3E - sema domain, immunoglobulin domain (ig), short basic domain, secreted, (semaphorin) 3e, ESRP2 - epithelial splicing regulatory protein 2, NOTCH4 - notch 4, PBX1 - pre-b-cell leukemia homeobox 1, STRA6 - stimulated by retinoic acid 6, CCDC40 - coiled-coil domain c…
GO:0001837	epithelial to mesenchymal transition	0.000897	0.0471	2.03	14437	45	2998	19	[TGFBR1 - transforming growth factor, beta receptor 1, FAM83D - family with sequence similarity 83, member d, TGFB2 - transforming growth factor, beta 2, EPB41L5 - erythrocyte membrane protein band 4.1 like 5, FOXF2 - forkhead box f2, WNT5A - wingless-type mmtv integration site family, member 5a, TGFBR3 - transforming growth factor, beta receptor iii, ERG - v-ets avian erythroblastosis virus e26 …
GO:0050890	cognition	0.000911	0.0476	1.48	14437	186	2998	57	[AFF2 - af4/fmr2 family, member 2, GPR155 - g protein-coupled receptor 155, NPAS4 - neuronal pas domain protein 4, GALR2 - galanin receptor 2, CHRNA7 - cholinergic receptor, nicotinic, alpha 7 (neuronal), GPR52 - g protein-coupled receptor 52, CHRNB2 - cholinergic receptor, nicotinic, beta 2 (neuronal), SLC6A4 - solute carrier family 6 (neurotransmitter transporter), member 4, ATP1A2 - atpase, na…
GO:0051048	negative regulation of secretion	0.000939	0.0489	1.53	14437	151	2998	48	[RHBDF1 - rhomboid 5 homolog 1 (drosophila), FN1 - fibronectin 1, PLA2R1 - phospholipase a2 receptor 1, 180kda, IL1R2 - interleukin 1 receptor, type ii, WNK4 - wnk lysine deficient protein kinase 4, ADRA2C - adrenoceptor alpha 2c, ABAT - 4-aminobutyrate aminotransferase, SYT4 - synaptotagmin iv, TNFRSF21 - tumor necrosis factor receptor superfamily, member 21, RGCC - regulator of cell cycle, INHB…
GO:0050878	regulation of body fluid levels	0.000955	0.0496	1.38	14437	279	2998	80	[HIST1H3D - histone cluster 1, h3d, OPRL1 - opiate receptor-like 1, HIST1H3C - histone cluster 1, h3c, TRPV4 - transient receptor potential cation channel, subfamily v, member 4, PHF21A - phd finger protein 21a, F12 - coagulation factor xii (hageman factor), WNK4 - wnk lysine deficient protein kinase 4, PRTN3 - proteinase 3, CHRM3 - cholinergic receptor, muscarinic 3, ABAT - 4-aminobutyrate amino…
GO:0071219	cellular response to molecule of bacterial origin	0.000964	0.0499	1.62	14437	113	2998	38	[CCR5 - chemokine (c-c motif) receptor 5 (gene/pseudogene), LILRB2 - leukocyte immunoglobulin-like receptor, subfamily b (with tm and itim domains), member 2, GFI1 - growth factor independent 1 transcription repressor, FZD5 - frizzled family receptor 5, STAR - steroidogenic acute regulatory protein, NOS2 - nitric oxide synthase 2, inducible, ADAMTS13 - adam metallopeptidase with thrombospondin ty…
GO:0045595	regulation of cell differentiation	0.000994	0.0512	1.17	14437	1245	2998	302	[TOB1 - transducer of erbb2, 1, GFAP - glial fibrillary acidic protein, EMP2 - epithelial membrane protein 2, LILRB2 - leukocyte immunoglobulin-like receptor, subfamily b (with tm and itim domains), member 2, GFI1 - growth factor independent 1 transcription repressor, CASZ1 - castor zinc finger 1, HSF4 - heat shock transcription factor 4, KIF20B - kinesin family member 20b, SEMA4C - sema domain, …

## Sheet: H37Ra 48 hours
GO Term	Description	P-value	FDR q-value	Enrichment	N	B	n	b	Genes
GO:0006952	defense response	2.02e-15	2.85e-11	1.5	14437	785	3508	287	[LGALS9 - lectin, galactoside-binding, soluble, 9, LILRB2 - leukocyte immunoglobulin-like receptor, subfamily b (with tm and itim domains), member 2, BNIP3 - bcl2/adenovirus e1b 19kda interacting protein 3, PXK - px domain containing serine/threonine kinase, DHX58 - dexh (asp-glu-x-his) box polypeptide 58, BNIP3L - bcl2/adenovirus e1b 19kda interacting protein 3-like, APOBEC3B - apolipoprotein b …
GO:0023052	signaling	5.03e-15	3.55e-11	1.66	14437	472	3508	190	[OPRL1 - opiate receptor-like 1, LILRB2 - leukocyte immunoglobulin-like receptor, subfamily b (with tm and itim domains), member 2, GPR52 - g protein-coupled receptor 52, CXCL9 - chemokine (c-x-c motif) ligand 9, SPTBN4 - spectrin, beta, non-erythrocytic 4, INHBA - inhibin, beta a, BST2 - bone marrow stromal cell antigen 2, PNOC - prepronociceptin, ATXN3 - ataxin 3, PTGDR2 - prostaglandin d2 rece…
GO:0044700	single organism signaling	5.24e-15	2.47e-11	1.66	14437	469	3508	189	[OPRL1 - opiate receptor-like 1, LILRB2 - leukocyte immunoglobulin-like receptor, subfamily b (with tm and itim domains), member 2, GPR52 - g protein-coupled receptor 52, CXCL9 - chemokine (c-x-c motif) ligand 9, SPTBN4 - spectrin, beta, non-erythrocytic 4, INHBA - inhibin, beta a, BST2 - bone marrow stromal cell antigen 2, PNOC - prepronociceptin, PTGDR2 - prostaglandin d2 receptor 2, ATXN3 - at…
GO:0032501	multicellular organismal process	1.4e-14	4.93e-11	1.26	14437	2308	3508	708	[LGALS9 - lectin, galactoside-binding, soluble, 9, NPAS4 - neuronal pas domain protein 4, PHF21A - phd finger protein 21a, SPTBN4 - spectrin, beta, non-erythrocytic 4, CATSPER2 - cation channel, sperm associated 2, GDNF - glial cell derived neurotrophic factor, ESRP2 - epithelial splicing regulatory protein 2, GCNT2 - glucosaminyl (n-acetyl) transferase 2, i-branching enzyme (i blood group), PNOC…
GO:0007267	cell-cell signaling	6.06e-14	1.71e-10	1.67	14437	422	3508	171	[OPRL1 - opiate receptor-like 1, LILRB2 - leukocyte immunoglobulin-like receptor, subfamily b (with tm and itim domains), member 2, GPR52 - g protein-coupled receptor 52, CXCL9 - chemokine (c-x-c motif) ligand 9, INHBA - inhibin, beta a, BST2 - bone marrow stromal cell antigen 2, PNOC - prepronociceptin, PTGDR2 - prostaglandin d2 receptor 2, ATXN3 - ataxin 3, CEACAM6 - carcinoembryonic antigen-re…
GO:0006955	immune response	3.7e-13	8.71e-10	1.5	14437	682	3508	248	[LAX1 - lymphocyte transmembrane adaptor 1, LILRB2 - leukocyte immunoglobulin-like receptor, subfamily b (with tm and itim domains), member 2, EMP2 - epithelial membrane protein 2, DHX58 - dexh (asp-glu-x-his) box polypeptide 58, APOBEC3B - apolipoprotein b mrna editing enzyme, catalytic polypeptide-like 3b, DDX60 - dead (asp-glu-ala-asp) box polypeptide 60, UNC93B1 - unc-93 homolog b1 (c. elegan…
GO:0098542	defense response to other organism	3.56e-12	7.18e-09	1.79	14437	267	3508	116	[IFITM1 - interferon induced transmembrane protein 1, BNIP3 - bcl2/adenovirus e1b 19kda interacting protein 3, BNIP3L - bcl2/adenovirus e1b 19kda interacting protein 3-like, DHX58 - dexh (asp-glu-x-his) box polypeptide 58, APOBEC3B - apolipoprotein b mrna editing enzyme, catalytic polypeptide-like 3b, DDX60 - dead (asp-glu-ala-asp) box polypeptide 60, UNC93B1 - unc-93 homolog b1 (c. elegans), CXC…
GO:0003008	system process	5.61e-12	9.91e-09	1.41	14437	859	3508	295	[EMP2 - epithelial membrane protein 2, NPAS4 - neuronal pas domain protein 4, HSD11B2 - hydroxysteroid (11-beta) dehydrogenase 2, SPTBN4 - spectrin, beta, non-erythrocytic 4, GDNF - glial cell derived neurotrophic factor, BTC - betacellulin, AMN - amnion associated transmembrane protein, PNOC - prepronociceptin, KCNE1L - kcne1-like, HRH1 - histamine receptor h1, GCH1 - gtp cyclohydrolase 1, CHRNA…
GO:0043207	response to external biotic stimulus	1.36e-11	2.13e-08	1.52	14437	544	3508	201	[LGALS9 - lectin, galactoside-binding, soluble, 9, LILRB2 - leukocyte immunoglobulin-like receptor, subfamily b (with tm and itim domains), member 2, BNIP3 - bcl2/adenovirus e1b 19kda interacting protein 3, BNIP3L - bcl2/adenovirus e1b 19kda interacting protein 3-like, DHX58 - dexh (asp-glu-x-his) box polypeptide 58, APOBEC3B - apolipoprotein b mrna editing enzyme, catalytic polypeptide-like 3b, …
GO:0051707	response to other organism	1.73e-11	2.44e-08	1.64	14437	366	3508	146	[LGALS9 - lectin, galactoside-binding, soluble, 9, IFITM1 - interferon induced transmembrane protein 1, BNIP3 - bcl2/adenovirus e1b 19kda interacting protein 3, BNIP3L - bcl2/adenovirus e1b 19kda interacting protein 3-like, DHX58 - dexh (asp-glu-x-his) box polypeptide 58, APOBEC3B - apolipoprotein b mrna editing enzyme, catalytic polypeptide-like 3b, DDX60 - dead (asp-glu-ala-asp) box polypeptide…
GO:0009607	response to biotic stimulus	3.67e-11	4.71e-08	1.5	14437	566	3508	206	[LGALS9 - lectin, galactoside-binding, soluble, 9, LILRB2 - leukocyte immunoglobulin-like receptor, subfamily b (with tm and itim domains), member 2, BNIP3 - bcl2/adenovirus e1b 19kda interacting protein 3, BNIP3L - bcl2/adenovirus e1b 19kda interacting protein 3-like, DHX58 - dexh (asp-glu-x-his) box polypeptide 58, APOBEC3B - apolipoprotein b mrna editing enzyme, catalytic polypeptide-like 3b, …
GO:0006954	inflammatory response	6.42e-11	7.55e-08	1.63	14437	362	3508	143	[LGALS9 - lectin, galactoside-binding, soluble, 9, PXK - px domain containing serine/threonine kinase, FN1 - fibronectin 1, F11R - f11 receptor, CXCL9 - chemokine (c-x-c motif) ligand 9, MIF - macrophage migration inhibitory factor (glycosylation-inhibiting factor), BLNK - b-cell linker, ORM1 - orosomucoid 1, ABCF1 - atp-binding cassette, sub-family f (gcn20), member 1, ORM2 - orosomucoid 2, AOX1…
GO:0002376	immune system process	1.59e-10	1.73e-07	1.29	14437	1378	3508	433	[LGALS9 - lectin, galactoside-binding, soluble, 9, SPTA1 - spectrin, alpha, erythrocytic 1 (elliptocytosis 2), APOBEC3B - apolipoprotein b mrna editing enzyme, catalytic polypeptide-like 3b, DDX60 - dead (asp-glu-ala-asp) box polypeptide 60, MADCAM1 - mucosal vascular addressin cell adhesion molecule 1, SH2D1B - sh2 domain containing 1b, CARD11 - caspase recruitment domain family, member 11, LCP2…
GO:0044707	single-multicellular organism process	3.42e-10	3.45e-07	1.24	14437	1837	3508	555	[NPAS4 - neuronal pas domain protein 4, PHF21A - phd finger protein 21a, SPTBN4 - spectrin, beta, non-erythrocytic 4, CATSPER2 - cation channel, sperm associated 2, GDNF - glial cell derived neurotrophic factor, ESRP2 - epithelial splicing regulatory protein 2, GCNT2 - glucosaminyl (n-acetyl) transferase 2, i-branching enzyme (i blood group), PML - promyelocytic leukemia, KCNE1L - kcne1-like, SPA…
GO:0008283	cell proliferation	3.73e-10	3.51e-07	1.48	14437	552	3508	198	[FAM83D - family with sequence similarity 83, member d, MIA - melanoma inhibitory activity, BRCA2 - breast cancer 2, early onset, TRAIP - traf interacting protein, EML1 - echinoderm microtubule associated protein like 1, RACGAP1 - rac gtpase activating protein 1, CARD11 - caspase recruitment domain family, member 11, BST2 - bone marrow stromal cell antigen 2, NCAPG2 - non-smc condensin ii complex…
GO:0051607	defense response to virus	6.13e-10	5.41e-07	2.01	14437	133	3508	65	[IFITM1 - interferon induced transmembrane protein 1, IFIT2 - interferon-induced protein with tetratricopeptide repeats 2, BNIP3 - bcl2/adenovirus e1b 19kda interacting protein 3, IFIT1 - interferon-induced protein with tetratricopeptide repeats 1, DHX58 - dexh (asp-glu-x-his) box polypeptide 58, BNIP3L - bcl2/adenovirus e1b 19kda interacting protein 3-like, IFIT3 - interferon-induced protein wit…
GO:0007154	cell communication	6.71e-10	5.57e-07	1.45	14437	586	3508	207	[LILRB2 - leukocyte immunoglobulin-like receptor, subfamily b (with tm and itim domains), member 2, BST2 - bone marrow stromal cell antigen 2, PNOC - prepronociceptin, CEACAM6 - carcinoembryonic antigen-related cell adhesion molecule 6 (non-specific cross reacting antigen), CHRNA9 - cholinergic receptor, nicotinic, alpha 9 (neuronal), FGF18 - fibroblast growth factor 18, WISP1 - wnt1 inducible si…
GO:0051239	regulation of multicellular organismal process	8.7e-10	6.83e-07	1.22	14437	2126	3508	629	[LGALS9 - lectin, galactoside-binding, soluble, 9, GFAP - glial fibrillary acidic protein, BMP2K - bmp2 inducible kinase, KIF20B - kinesin family member 20b, TNFRSF12A - tumor necrosis factor receptor superfamily, member 12a, DDX60 - dead (asp-glu-ala-asp) box polypeptide 60, SPTBN4 - spectrin, beta, non-erythrocytic 4, SPOCK1 - sparc/osteonectin, cwcv and kazal-like domains proteoglycan (testica…
GO:0009605	response to external stimulus	1.22e-09	9.04e-07	1.34	14437	954	3508	311	[LGALS9 - lectin, galactoside-binding, soluble, 9, LILRB2 - leukocyte immunoglobulin-like receptor, subfamily b (with tm and itim domains), member 2, BNIP3 - bcl2/adenovirus e1b 19kda interacting protein 3, DHX58 - dexh (asp-glu-x-his) box polypeptide 58, BNIP3L - bcl2/adenovirus e1b 19kda interacting protein 3-like, APOBEC3B - apolipoprotein b mrna editing enzyme, catalytic polypeptide-like 3b, …
GO:0007186	G-protein coupled receptor signaling pathway	1.94e-09	1.37e-06	1.48	14437	504	3508	181	[OPRL1 - opiate receptor-like 1, RGS19 - regulator of g-protein signaling 19, GPR124 - g protein-coupled receptor 124, OR1F1 - olfactory receptor, family 1, subfamily f, member 1, GPR52 - g protein-coupled receptor 52, OR2C1 - olfactory receptor, family 2, subfamily c, member 1, TAS2R10 - taste receptor, type 2, member 10, GPR55 - g protein-coupled receptor 55, CXCL9 - chemokine (c-x-c motif) lig…
GO:0042127	regulation of cell proliferation	4.94e-09	3.32e-06	1.29	14437	1212	3508	379	[TOB1 - transducer of erbb2, 1, LGALS9 - lectin, galactoside-binding, soluble, 9, GFAP - glial fibrillary acidic protein, EMP2 - epithelial membrane protein 2, LILRB2 - leukocyte immunoglobulin-like receptor, subfamily b (with tm and itim domains), member 2, SPTA1 - spectrin, alpha, erythrocytic 1 (elliptocytosis 2), SIX5 - six homeobox 5, EMP3 - epithelial membrane protein 3, TRIM24 - tripartite…
GO:0006270	DNA replication initiation	6.72e-09	4.32e-06	3.05	14437	31	3508	23	[CDC6 - cell division cycle 6, POLA2 - polymerase (dna directed), alpha 2, accessory subunit, CCNE2 - cyclin e2, ORC1 - origin recognition complex, subunit 1, CCNE1 - cyclin e1, PRIM1 - primase, dna, polypeptide 1 (49kda), GINS4 - gins complex subunit 4 (sld5 homolog), MCM4 - minichromosome maintenance complex component 4, MCM3 - minichromosome maintenance complex component 3, POLE2 - polymerase …
GO:0009615	response to virus	6.88e-09	4.22e-06	1.74	14437	208	3508	88	[LGALS9 - lectin, galactoside-binding, soluble, 9, IFITM1 - interferon induced transmembrane protein 1, IFIT2 - interferon-induced protein with tetratricopeptide repeats 2, IFIT1 - interferon-induced protein with tetratricopeptide repeats 1, BNIP3 - bcl2/adenovirus e1b 19kda interacting protein 3, IFIT3 - interferon-induced protein with tetratricopeptide repeats 3, DHX58 - dexh (asp-glu-x-his) bo…
GO:0007165	signal transduction	8.63e-09	5.08e-06	1.15	14437	3454	3508	965	[ARAP2 - arfgap with rhogap domain, ankyrin repeat and ph domain 2, GFRA2 - gdnf family receptor alpha 2, MADCAM1 - mucosal vascular addressin cell adhesion molecule 1, GDNF - glial cell derived neurotrophic factor, PLXNB3 - plexin b3, ESRP2 - epithelial splicing regulatory protein 2, GCNT2 - glucosaminyl (n-acetyl) transferase 2, i-branching enzyme (i blood group), PNOC - prepronociceptin, PML -…
tripartite motif containing 5, DUSP9 - dual specificity phosphatase 9, MESP2 - mesoderm posterior 2 homolog (mouse), SLAMF1 - signaling lymphocytic activation molecule family member 1, DIXDC1 - dix domain containing 1, DUSP5 - dual specificity phosphatase 5, DUSP6 - dual specificity phosphatase 6, DISP2 - dispatched homolog 2 (drosophila), DUSP7 - dual specificity phosphatase 7, MAS1 - mas1 oncog…
GO:0070098	chemokine-mediated signaling pathway	1.33e-08	7.49e-06	2.45	14437	57	3508	34	[CCR5 - chemokine (c-c motif) receptor 5 (gene/pseudogene), CCL3L3 - chemokine (c-c motif) ligand 3-like 3, CCR7 - chemokine (c-c motif) receptor 7, CMKLR1 - chemokine-like receptor 1, CXCL9 - chemokine (c-x-c motif) ligand 9, CXCL12 - chemokine (c-x-c motif) ligand 12, CCR1 - chemokine (c-c motif) receptor 1, CCR3 - chemokine (c-c motif) receptor 3, CCR2 - chemokine (c-c motif) receptor 2, ACKR4…
GO:0043901	negative regulation of multi-organism process	1.92e-08	1.05e-05	2.02	14437	108	3508	53	[IFITM1 - interferon induced transmembrane protein 1, IFIT1 - interferon-induced protein with tetratricopeptide repeats 1, TIMP1 - timp metallopeptidase inhibitor 1, IFI16 - interferon, gamma-inducible protein 16, OASL - 2'-5'-oligoadenylate synthetase-like, PTX3 - pentraxin 3, long, IL12B - interleukin 12b (natural killer cell stimulatory factor 2, cytotoxic lymphocyte maturation factor 2, p40),…
GO:0050896	response to stimulus	2.5e-08	1.31e-05	1.14	14437	3616	3508	1002	[GFAP - glial fibrillary acidic protein, DDX60 - dead (asp-glu-ala-asp) box polypeptide 60, WDR76 - wd repeat domain 76, AANAT - aralkylamine n-acetyltransferase, GATSL3 - gats protein-like 3, CATSPER2 - cation channel, sperm associated 2, MADCAM1 - mucosal vascular addressin cell adhesion molecule 1, ABCA2 - atp-binding cassette, sub-family a (abc1), member 2, SH2D1B - sh2 domain containing 1b, …
DA - myeloid cell nuclear differentiation antigen, IMMP2L - imp2 inner mitochondrial membrane peptidase-like (s. cerevisiae), CXCL11 - chemokine (c-x-c motif) ligand 11, EYS - eyes shut homolog (drosophila), DEFB1 - defensin, beta 1, RAB23 - rab23, member ras oncogene family, CXCL6 - chemokine (c-x-c motif) ligand 6, FCAMR - fc receptor, iga, igm, high affinity, MSRB3 - methionine sulfoxide reduc…
GO:0051240	positive regulation of multicellular organismal process	5.13e-08	2.59e-05	1.28	14437	1139	3508	353	[GFAP - glial fibrillary acidic protein, LGALS9 - lectin, galactoside-binding, soluble, 9, LILRB2 - leukocyte immunoglobulin-like receptor, subfamily b (with tm and itim domains), member 2, DHX58 - dexh (asp-glu-x-his) box polypeptide 58, KIF20B - kinesin family member 20b, TNFRSF12A - tumor necrosis factor receptor superfamily, member 12a, BRCA1 - breast cancer 1, early onset, SPTBN4 - spectrin,…
GO:0007166	cell surface receptor signaling pathway	6.25e-08	3.04e-05	1.22	14437	1666	3508	494	[GFRA2 - gdnf family receptor alpha 2, TNFRSF12A - tumor necrosis factor receptor superfamily, member 12a, MADCAM1 - mucosal vascular addressin cell adhesion molecule 1, PLXNB3 - plexin b3, CARD11 - caspase recruitment domain family, member 11, ESRP2 - epithelial splicing regulatory protein 2, GCNT2 - glucosaminyl (n-acetyl) transferase 2, i-branching enzyme (i blood group), LCP2 - lymphocyte cyt…
GO:0030198	extracellular matrix organization	1.12e-07	5.29e-05	1.65	14437	225	3508	90	[GFAP - glial fibrillary acidic protein, TIMP1 - timp metallopeptidase inhibitor 1, ITGA10 - integrin, alpha 10, FN1 - fibronectin 1, NOXO1 - nadph oxidase organizer 1, F11R - f11 receptor, ADAMTS5 - adam metallopeptidase with thrombospondin type 1 motif, 5, MADCAM1 - mucosal vascular addressin cell adhesion molecule 1, KDR - kinase insert domain receptor (a type iii receptor tyrosine kinase), CC…
GO:0043062	extracellular structure organization	1.43e-07	6.5e-05	1.64	14437	226	3508	90	[GFAP - glial fibrillary acidic protein, TIMP1 - timp metallopeptidase inhibitor 1, ITGA10 - integrin, alpha 10, FN1 - fibronectin 1, NOXO1 - nadph oxidase organizer 1, F11R - f11 receptor, ADAMTS5 - adam metallopeptidase with thrombospondin type 1 motif, 5, MADCAM1 - mucosal vascular addressin cell adhesion molecule 1, KDR - kinase insert domain receptor (a type iii receptor tyrosine kinase), CC…
GO:0008284	positive regulation of cell proliferation	1.56e-07	6.89e-05	1.36	14437	654	3508	216	[LGALS9 - lectin, galactoside-binding, soluble, 9, GFAP - glial fibrillary acidic protein, LILRB2 - leukocyte immunoglobulin-like receptor, subfamily b (with tm and itim domains), member 2, EMP2 - epithelial membrane protein 2, SPTA1 - spectrin, alpha, erythrocytic 1 (elliptocytosis 2), KIF20B - kinesin family member 20b, CD274 - cd274 molecule, GDNF - glial cell derived neurotrophic factor, CARD…
GO:0010562	positive regulation of phosphorus metabolic process	1.71e-07	7.33e-05	1.31	14437	837	3508	267	[LGALS9 - lectin, galactoside-binding, soluble, 9, EMP2 - epithelial membrane protein 2, GFRA2 - gdnf family receptor alpha 2, SEMA4C - sema domain, immunoglobulin domain (ig), transmembrane domain (tm) and short cytoplasmic domain, (semaphorin) 4c, CARD14 - caspase recruitment domain family, member 14, AKAP12 - a kinase (prka) anchor protein 12, GCNT2 - glucosaminyl (n-acetyl) transferase 2, i-b…
GO:0045937	positive regulation of phosphate metabolic process	1.71e-07	7.11e-05	1.31	14437	837	3508	267	[LGALS9 - lectin, galactoside-binding, soluble, 9, EMP2 - epithelial membrane protein 2, GFRA2 - gdnf family receptor alpha 2, SEMA4C - sema domain, immunoglobulin domain (ig), transmembrane domain (tm) and short cytoplasmic domain, (semaphorin) 4c, CARD14 - caspase recruitment domain family, member 14, AKAP12 - a kinase (prka) anchor protein 12, GCNT2 - glucosaminyl (n-acetyl) transferase 2, i-b…
GO:0050729	positive regulation of inflammatory response	1.96e-07	7.92e-05	1.99	14437	97	3508	47	[TRPV4 - transient receptor potential cation channel, subfamily v, member 4, FFAR2 - free fatty acid receptor 2, CCR7 - chemokine (c-c motif) receptor 7, CCL3L3 - chemokine (c-c motif) ligand 3-like 3, LTA - lymphotoxin alpha, F12 - coagulation factor xii (hageman factor), FABP4 - fatty acid binding protein 4, adipocyte, ITGA2 - integrin, alpha 2 (cd49b, alpha 2 subunit of vla-2 receptor), IL12B …
GO:1903046	meiotic cell cycle process	2.18e-07	8.57e-05	1.81	14437	141	3508	62	[DSN1 - dsn1, mis12 kinetochore complex component, C17orf104 - chromosome 17 open reading frame 104, HFM1 - hfm1, atp-dependent dna helicase homolog (s. cerevisiae), CCNE2 - cyclin e2, SYCP1 - synaptonemal complex protein 1, BRCA2 - breast cancer 2, early onset, SGOL1 - shugoshin-like 1 (s. pombe), ANKLE1 - ankyrin repeat and lem domain containing 1, PLD6 - phospholipase d family, member 6, CDC25…
GO:0042330	taxis	2.44e-07	9.31e-05	1.59	14437	254	3508	98	[LGALS9 - lectin, galactoside-binding, soluble, 9, SEMA4C - sema domain, immunoglobulin domain (ig), transmembrane domain (tm) and short cytoplasmic domain, (semaphorin) 4c, CXCL9 - chemokine (c-x-c motif) ligand 9, MIF - macrophage migration inhibitory factor (glycosylation-inhibiting factor), CXCL12 - chemokine (c-x-c motif) ligand 12, PLXNB3 - plexin b3, PTGDR2 - prostaglandin d2 receptor 2, H…
GO:0045071	negative regulation of viral genome replication	2.64e-07	9.8e-05	2.45	14437	47	3508	28	[IFITM1 - interferon induced transmembrane protein 1, IFIT1 - interferon-induced protein with tetratricopeptide repeats 1, IFI16 - interferon, gamma-inducible protein 16, OASL - 2'-5'-oligoadenylate synthetase-like, ISG20 - interferon stimulated exonuclease gene 20kda, ADAR - adenosine deaminase, rna-specific, BST2 - bone marrow stromal cell antigen 2, ISG15 - isg15 ubiquitin-like modifier, MX1 -…
GO:0006935	chemotaxis	3.95e-07	0.000143	1.58	14437	253	3508	97	[LGALS9 - lectin, galactoside-binding, soluble, 9, SEMA4C - sema domain, immunoglobulin domain (ig), transmembrane domain (tm) and short cytoplasmic domain, (semaphorin) 4c, CXCL9 - chemokine (c-x-c motif) ligand 9, MIF - macrophage migration inhibitory factor (glycosylation-inhibiting factor), CXCL12 - chemokine (c-x-c motif) ligand 12, PLXNB3 - plexin b3, PTGDR2 - prostaglandin d2 receptor 2, H…
GO:0050900	leukocyte migration	8.16e-07	0.000288	1.6	14437	224	3508	87	[CCL3L3 - chemokine (c-c motif) ligand 3-like 3, FN1 - fibronectin 1, CD244 - cd244 molecule, natural killer cell receptor 2b4, F11R - f11 receptor, HMGB1 - high mobility group box 1, MIF - macrophage migration inhibitory factor (glycosylation-inhibiting factor), ATP1B1 - atpase, na+/k+ transporting, beta 1 polypeptide, TBX21 - t-box 21, HRH1 - histamine receptor h1, CEACAM6 - carcinoembryonic an…
GO:0022414	reproductive process	8.45e-07	0.000291	1.27	14437	961	3508	297	[LGALS9 - lectin, galactoside-binding, soluble, 9, EMP2 - epithelial membrane protein 2, DSN1 - dsn1, mis12 kinetochore complex component, SIX5 - six homeobox 5, HSF2 - heat shock transcription factor 2, HVCN1 - hydrogen voltage-gated channel 1, ACSBG2 - acyl-coa synthetase bubblegum family member 2, BRCA2 - breast cancer 2, early onset, HSD11B2 - hydroxysteroid (11-beta) dehydrogenase 2, SPTBN4 …
GO:1903522	regulation of blood circulation	9.88e-07	0.000332	1.61	14437	212	3508	83	[FXYD2 - fxyd domain containing ion transport regulator 2, GSTM2 - glutathione s-transferase mu 2 (muscle), ATP2A1 - atpase, ca++ transporting, cardiac muscle, fast twitch 1, ATP2B2 - atpase, ca++ transporting, plasma membrane 2, NOS2 - nitric oxide synthase 2, inducible, RNF207 - ring finger protein 207, ADRA2C - adrenoceptor alpha 2c, SPTBN4 - spectrin, beta, non-erythrocytic 4, CHRM3 - choline…
GO:0019221	cytokine-mediated signaling pathway	1.1e-06	0.000362	1.44	14437	382	3508	134	[IFITM1 - interferon induced transmembrane protein 1, SLC27A1 - solute carrier family 27 (fatty acid transporter), member 1, BIRC3 - baculoviral iap repeat containing 3, IL15RA - interleukin 15 receptor, alpha, TNFRSF12A - tumor necrosis factor receptor superfamily, member 12a, CXCL9 - chemokine (c-x-c motif) ligand 9, CARD14 - caspase recruitment domain family, member 14, IL11RA - interleukin 11…
GO:0032103	positive regulation of response to external stimulus	1.24e-06	0.000398	1.6	14437	213	3508	83	[LGALS9 - lectin, galactoside-binding, soluble, 9, TRPV4 - transient receptor potential cation channel, subfamily v, member 4, CCL3L3 - chemokine (c-c motif) ligand 3-like 3, DHX58 - dexh (asp-glu-x-his) box polypeptide 58, F12 - coagulation factor xii (hageman factor), DDX60 - dead (asp-glu-ala-asp) box polypeptide 60, FABP4 - fatty acid binding protein 4, adipocyte, CXCL9 - chemokine (c-x-c mot…
GO:0050877	neurological system process	1.89e-06	0.000594	1.37	14437	507	3508	169	[OPRL1 - opiate receptor-like 1, AFF2 - af4/fmr2 family, member 2, GPR155 - g protein-coupled receptor 155, NPAS4 - neuronal pas domain protein 4, GPR52 - g protein-coupled receptor 52, CDH3 - cadherin 3, type 1, p-cadherin (placental), MIP - major intrinsic protein of lens fiber, SPTBN4 - spectrin, beta, non-erythrocytic 4, CNTNAP1 - contactin associated protein 1, IL12B - interleukin 12b (natur…
GO:0060326	cell chemotaxis	2.19e-06	0.000672	1.71	14437	149	3508	62	[CCL3L3 - chemokine (c-c motif) ligand 3-like 3, CXCL9 - chemokine (c-x-c motif) ligand 9, HMGB2 - high mobility group box 2, HMGB1 - high mobility group box 1, CXCL12 - chemokine (c-x-c motif) ligand 12, PLXNB3 - plexin b3, HRH1 - histamine receptor h1, AMICA1 - adhesion molecule, interacts with cxadr antigen 1, CHGA - chromogranin a (parathyroid secretory protein 1), SLAMF1 - signaling lymphocy…
GO:0048856	anatomical structure development	2.72e-06	0.000817	1.15	14437	2439	3508	682	[GFAP - glial fibrillary acidic protein, MDGA1 - mam domain containing glycosylphosphatidylinositol anchor 1, SPTA1 - spectrin, alpha, erythrocytic 1 (elliptocytosis 2), GFRA2 - gdnf family receptor alpha 2, SPOCK1 - sparc/osteonectin, cwcv and kazal-like domains proteoglycan (testican) 1, CATSPER2 - cation channel, sperm associated 2, GDNF - glial cell derived neurotrophic factor, SEPT4 - septin…
GO:0002252	immune effector process	2.92e-06	0.00086	1.43	14437	371	3508	129	[IFITM1 - interferon induced transmembrane protein 1, EMP2 - epithelial membrane protein 2, BNIP3 - bcl2/adenovirus e1b 19kda interacting protein 3, BNIP3L - bcl2/adenovirus e1b 19kda interacting protein 3-like, DHX58 - dexh (asp-glu-x-his) box polypeptide 58, APOBEC3B - apolipoprotein b mrna editing enzyme, catalytic polypeptide-like 3b, CD244 - cd244 molecule, natural killer cell receptor 2b4, …
GO:0030278	regulation of ossification	2.93e-06	0.000845	1.71	14437	147	3508	61	[TOB1 - transducer of erbb2, 1, IFITM1 - interferon induced transmembrane protein 1, BMP2K - bmp2 inducible kinase, WNT10B - wingless-type mmtv integration site family, member 10b, PBX1 - pre-b-cell leukemia homeobox 1, ANKH - ankh inorganic pyrophosphate transport regulator, ID2 - inhibitor of dna binding 2, dominant negative helix-loop-helix protein, ID3 - inhibitor of dna binding 3, dominant n…
GO:0001934	positive regulation of protein phosphorylation	2.97e-06	0.00084	1.3	14437	725	3508	229	[LGALS9 - lectin, galactoside-binding, soluble, 9, EMP2 - epithelial membrane protein 2, GFRA2 - gdnf family receptor alpha 2, SEMA4C - sema domain, immunoglobulin domain (ig), transmembrane domain (tm) and short cytoplasmic domain, (semaphorin) 4c, CARD14 - caspase recruitment domain family, member 14, GCNT2 - glucosaminyl (n-acetyl) transferase 2, i-branching enzyme (i blood group), LCP2 - lymp…
GO:0044057	regulation of system process	3.35e-06	0.000927	1.43	14437	365	3508	127	[OPRL1 - opiate receptor-like 1, GSTM2 - glutathione s-transferase mu 2 (muscle), EMP2 - epithelial membrane protein 2, SPTBN4 - spectrin, beta, non-erythrocytic 4, INHBA - inhibin, beta a, TRPC3 - transient receptor potential cation channel, subfamily c, member 3, ANXA6 - annexin a6, ACE - angiotensin i converting enzyme, KCNE1L - kcne1-like, HRH1 - histamine receptor h1, GCH1 - gtp cyclohydrola…
GO:0051276	chromosome organization	3.49e-06	0.000947	1.42	14437	379	3508	131	[DSN1 - dsn1, mis12 kinetochore complex component, RFC4 - replication factor c (activator 1) 4, 37kda, RFC5 - replication factor c (activator 1) 5, 36.5kda, CDC20 - cell division cycle 20, HAT1 - histone acetyltransferase 1, RFC2 - replication factor c (activator 1) 2, 40kda, BIRC5 - baculoviral iap repeat containing 5, RFC3 - replication factor c (activator 1) 3, 38kda, CDK1 - cyclin-dependent k…
GO:0002685	regulation of leukocyte migration	4.32e-06	0.00115	1.73	14437	133	3508	56	[LGALS9 - lectin, galactoside-binding, soluble, 9, TRPV4 - transient receptor potential cation channel, subfamily v, member 4, CXCL9 - chemokine (c-x-c motif) ligand 9, HMGB1 - high mobility group box 1, CXCL12 - chemokine (c-x-c motif) ligand 12, MADCAM1 - mucosal vascular addressin cell adhesion molecule 1, IL12A - interleukin 12a (natural killer cell stimulatory factor 1, cytotoxic lymphocyte …
GO:0003013	circulatory system process	5.1e-06	0.00134	1.69	14437	146	3508	60	[TRPV4 - transient receptor potential cation channel, subfamily v, member 4, TJP1 - tight junction protein 1, NOS2 - nitric oxide synthase 2, inducible, SLC6A4 - solute carrier family 6 (neurotransmitter transporter), member 4, RCAN1 - regulator of calcineurin 1, ADRA2C - adrenoceptor alpha 2c, CHRM3 - cholinergic receptor, muscarinic 3, CXCL12 - chemokine (c-x-c motif) ligand 12, ACE - angiotens…
GO:0048525	negative regulation of viral process	5.18e-06	0.00133	1.95	14437	80	3508	38	[IFITM1 - interferon induced transmembrane protein 1, IFIT1 - interferon-induced protein with tetratricopeptide repeats 1, IFI16 - interferon, gamma-inducible protein 16, OASL - 2'-5'-oligoadenylate synthetase-like, PTX3 - pentraxin 3, long, JUN - jun proto-oncogene, ISG20 - interferon stimulated exonuclease gene 20kda, STAT1 - signal transducer and activator of transcription 1, 91kda, TRIM62 - t…
GO:0043269	regulation of ion transport	5.78e-06	0.00146	1.38	14437	431	3508	145	[OPRL1 - opiate receptor-like 1, GSTM2 - glutathione s-transferase mu 2 (muscle), LILRB2 - leukocyte immunoglobulin-like receptor, subfamily b (with tm and itim domains), member 2, PXK - px domain containing serine/threonine kinase, HVCN1 - hydrogen voltage-gated channel 1, CXCL9 - chemokine (c-x-c motif) ligand 9, SPTBN4 - spectrin, beta, non-erythrocytic 4, MIF - macrophage migration inhibitory…
GO:0016477	cell migration	6.77e-06	0.00168	1.31	14437	624	3508	199	[MDGA1 - mam domain containing glycosylphosphatidylinositol anchor 1, EMP2 - epithelial membrane protein 2, FAM83D - family with sequence similarity 83, member d, SEMA4C - sema domain, immunoglobulin domain (ig), transmembrane domain (tm) and short cytoplasmic domain, (semaphorin) 4c, SPOCK1 - sparc/osteonectin, cwcv and kazal-like domains proteoglycan (testican) 1, GDNF - glial cell derived neur…
GO:1903901	negative regulation of viral life cycle	7.14e-06	0.00174	1.95	14437	78	3508	37	[IFITM1 - interferon induced transmembrane protein 1, IFIT1 - interferon-induced protein with tetratricopeptide repeats 1, IFI16 - interferon, gamma-inducible protein 16, OASL - 2'-5'-oligoadenylate synthetase-like, PTX3 - pentraxin 3, long, JUN - jun proto-oncogene, ISG20 - interferon stimulated exonuclease gene 20kda, TRIM62 - tripartite motif containing 62, ADAR - adenosine deaminase, rna-spec…
GO:0042312	regulation of vasodilation	7.15e-06	0.00171	2.47	14437	35	3508	21	[UTS2B - urotensin 2b, UCN - urocortin, CPS1 - carbamoyl-phosphate synthase 1, mitochondrial, PTAFR - platelet-activating factor receptor, NOS2 - nitric oxide synthase 2, inducible, NPR1 - natriuretic peptide receptor a/guanylate cyclase a (atrionatriuretic peptide receptor a), ALOX12 - arachidonate 12-lipoxygenase, NPPC - natriuretic peptide c, EGFR - epidermal growth factor receptor, GJA1 - gap…
GO:0034341	response to interferon-gamma	8.08e-06	0.0019	2.03	14437	67	3508	33	[IFITM1 - interferon induced transmembrane protein 1, LGALS9 - lectin, galactoside-binding, soluble, 9, CCL3L3 - chemokine (c-c motif) ligand 3-like 3, STAR - steroidogenic acute regulatory protein, NOS2 - nitric oxide synthase 2, inducible, ADAMTS13 - adam metallopeptidase with thrombospondin type 1 motif, 13, IL12B - interleukin 12b (natural killer cell stimulatory factor 2, cytotoxic lymphocyt…
GO:0003018	vascular process in circulatory system	8.6e-06	0.00199	1.78	14437	111	3508	48	[ARHGAP42 - rho gtpase activating protein 42, TEK - tek tyrosine kinase, endothelial, TRPV4 - transient receptor potential cation channel, subfamily v, member 4, PTAFR - platelet-activating factor receptor, TJP1 - tight junction protein 1, SLC6A4 - solute carrier family 6 (neurotransmitter transporter), member 4, NOS2 - nitric oxide synthase 2, inducible, ADRA2C - adrenoceptor alpha 2c, ALOX12 - …
GO:0030595	leukocyte chemotaxis	8.67e-06	0.00198	1.8	14437	105	3508	46	[CCR5 - chemokine (c-c motif) receptor 5 (gene/pseudogene), FFAR2 - free fatty acid receptor 2, ITGA9 - integrin, alpha 9, CCR7 - chemokine (c-c motif) receptor 7, CCL3L3 - chemokine (c-c motif) ligand 3-like 3, SCG2 - secretogranin ii, HMGB1 - high mobility group box 1, ITGA1 - integrin, alpha 1, CCR1 - chemokine (c-c motif) receptor 1, AZU1 - azurocidin 1, PDGFB - platelet-derived growth factor…
GO:0009653	anatomical structure morphogenesis	1.04e-05	0.00234	1.24	14437	995	3508	299	[KIF20B - kinesin family member 20b, SPTBN4 - spectrin, beta, non-erythrocytic 4, GDNF - glial cell derived neurotrophic factor, GCNT1 - glucosaminyl (n-acetyl) transferase 1, core 2, ESRP2 - epithelial splicing regulatory protein 2, FARP1 - ferm, rhogef (arhgef) and pleckstrin domain protein 1 (chondrocyte-derived), PML - promyelocytic leukemia, GCNT4 - glucosaminyl (n-acetyl) transferase 4, cor…
GO:0050880	regulation of blood vessel size	1.15e-05	0.00254	1.85	14437	91	3508	41	[ARHGAP42 - rho gtpase activating protein 42, PTAFR - platelet-activating factor receptor, NOS2 - nitric oxide synthase 2, inducible, SLC6A4 - solute carrier family 6 (neurotransmitter transporter), member 4, ADRA2C - adrenoceptor alpha 2c, ALOX12 - arachidonate 12-lipoxygenase, CHRM3 - cholinergic receptor, muscarinic 3, ITGA1 - integrin, alpha 1, EGFR - epidermal growth factor receptor, ACE - a…
GO:0035150	regulation of tube size	1.15e-05	0.0025	1.85	14437	91	3508	41	[ARHGAP42 - rho gtpase activating protein 42, PTAFR - platelet-activating factor receptor, NOS2 - nitric oxide synthase 2, inducible, SLC6A4 - solute carrier family 6 (neurotransmitter transporter), member 4, ADRA2C - adrenoceptor alpha 2c, ALOX12 - arachidonate 12-lipoxygenase, CHRM3 - cholinergic receptor, muscarinic 3, ITGA1 - integrin, alpha 1, EGFR - epidermal growth factor receptor, ACE - a…
GO:0002687	positive regulation of leukocyte migration	1.17e-05	0.0025	1.84	14437	94	3508	42	[LGALS9 - lectin, galactoside-binding, soluble, 9, TRPV4 - transient receptor potential cation channel, subfamily v, member 4, ITGA4 - integrin, alpha 4 (antigen cd49d, alpha 4 subunit of vla-4 receptor), CCR7 - chemokine (c-c motif) receptor 7, PTAFR - platelet-activating factor receptor, CMKLR1 - chemokine-like receptor 1, CXCL9 - chemokine (c-x-c motif) ligand 9, ITGA2 - integrin, alpha 2 (cd4…
GO:0044243	multicellular organismal catabolic process	1.27e-05	0.00269	2.09	14437	57	3508	29	[ADAMTS3 - adam metallopeptidase with thrombospondin type 1 motif, 3, PRTN3 - proteinase 3, ACE - angiotensin i converting enzyme, COL3A1 - collagen, type iii, alpha 1, COL4A1 - collagen, type iv, alpha 1, CTSL - cathepsin l, MMP1 - matrix metallopeptidase 1 (interstitial collagenase), CTSK - cathepsin k, COL8A1 - collagen, type viii, alpha 1, MMP7 - matrix metallopeptidase 7 (matrilysin, uterine…
GO:0006950	response to stress	1.47e-05	0.00305	1.14	14437	2288	3508	636	[LGALS9 - lectin, galactoside-binding, soluble, 9, GFAP - glial fibrillary acidic protein, APOBEC3B - apolipoprotein b mrna editing enzyme, catalytic polypeptide-like 3b, DDX60 - dead (asp-glu-ala-asp) box polypeptide 60, WDR76 - wd repeat domain 76, SH2D1B - sh2 domain containing 1b, ABCF1 - atp-binding cassette, sub-family f (gcn20), member 1, CHAF1B - chromatin assembly factor 1, subunit b (p6…
GO:0032502	developmental process	1.5e-05	0.00307	1.11	14437	3620	3508	974	[GFAP - glial fibrillary acidic protein, GFRA2 - gdnf family receptor alpha 2, CATSPER2 - cation channel, sperm associated 2, MADCAM1 - mucosal vascular addressin cell adhesion molecule 1, GDNF - glial cell derived neurotrophic factor, SEPT4 - septin 4, GCNT1 - glucosaminyl (n-acetyl) transferase 1, core 2, ESRP2 - epithelial splicing regulatory protein 2, GCNT2 - glucosaminyl (n-acetyl) transfer…
huntingtin-associated protein 1, RILPL1 - rab interacting lysosomal protein-like 1, SFTPB - surfactant protein b, DMD - dystrophin, DMP1 - dentin matrix acidic phosphoprotein 1, SGK1 - serum/glucocorticoid regulated kinase 1, C6orf58 - chromosome 6 open reading frame 58, NAV2 - neuron navigator 2, LSR - lipolysis stimulated lipoprotein receptor, MAF - v-maf avian musculoaponeurotic fibrosarcoma o…
GO:0007187	G-protein coupled receptor signaling pathway, coupled to cyclic nucleotide second messenger	1.58e-05	0.00319	1.77	14437	107	3508	46	[GRK5 - g protein-coupled receptor kinase 5, OPRL1 - opiate receptor-like 1, PRKACB - protein kinase, camp-dependent, catalytic, beta, GPR52 - g protein-coupled receptor 52, SLC9A3R1 - solute carrier family 9, subfamily a (nhe3, cation proton antiporter 3), member 3 regulator 1, ADRA2C - adrenoceptor alpha 2c, GALR1 - galanin receptor 1, CHRM3 - cholinergic receptor, muscarinic 3, CHRM4 - choline…
GO:0032101	regulation of response to external stimulus	1.84e-05	0.00367	1.32	14437	550	3508	176	[LGALS9 - lectin, galactoside-binding, soluble, 9, GPR124 - g protein-coupled receptor 124, PHLDB2 - pleckstrin homology-like domain, family b, member 2, DHX58 - dexh (asp-glu-x-his) box polypeptide 58, TRIM24 - tripartite motif containing 24, BIRC3 - baculoviral iap repeat containing 3, SEMA4C - sema domain, immunoglobulin domain (ig), transmembrane domain (tm) and short cytoplasmic domain, (sem…
GO:0033993	response to lipid	1.93e-05	0.00379	1.31	14437	572	3508	182	[OPRL1 - opiate receptor-like 1, LGALS9 - lectin, galactoside-binding, soluble, 9, LILRB2 - leukocyte immunoglobulin-like receptor, subfamily b (with tm and itim domains), member 2, NPAS4 - neuronal pas domain protein 4, AANAT - aralkylamine n-acetyltransferase, PAQR9 - progestin and adipoq receptor family member ix, HSD11B2 - hydroxysteroid (11-beta) dehydrogenase 2, CXCL9 - chemokine (c-x-c mot…
GO:0034097	response to cytokine	1.98e-05	0.00384	1.42	14437	318	3508	110	[LGALS9 - lectin, galactoside-binding, soluble, 9, IFITM1 - interferon induced transmembrane protein 1, AANAT - aralkylamine n-acetyltransferase, BRCA1 - breast cancer 1, early onset, CD274 - cd274 molecule, IL12B - interleukin 12b (natural killer cell stimulatory factor 2, cytotoxic lymphocyte maturation factor 2, p40), BST2 - bone marrow stromal cell antigen 2, TMEM173 - transmembrane protein 1…
GO:0042327	positive regulation of phosphorylation	2.22e-05	0.00423	1.26	14437	759	3508	233	[LGALS9 - lectin, galactoside-binding, soluble, 9, EMP2 - epithelial membrane protein 2, GFRA2 - gdnf family receptor alpha 2, SEMA4C - sema domain, immunoglobulin domain (ig), transmembrane domain (tm) and short cytoplasmic domain, (semaphorin) 4c, CARD14 - caspase recruitment domain family, member 14, GCNT2 - glucosaminyl (n-acetyl) transferase 2, i-branching enzyme (i blood group), LCP2 - lymp…
GO:0035455	response to interferon-alpha	2.44e-05	0.00459	2.97	14437	18	3508	13	[IFITM1 - interferon induced transmembrane protein 1, IFIT2 - interferon-induced protein with tetratricopeptide repeats 2, IFITM3 - interferon induced transmembrane protein 3, IFIT3 - interferon-induced protein with tetratricopeptide repeats 3, GATA3 - gata binding protein 3, STAR - steroidogenic acute regulatory protein, IFITM2 - interferon induced transmembrane protein 2, ADAR - adenosine deami…
GO:0003014	renal system process	2.45e-05	0.00456	1.97	14437	67	3508	32	[OPRL1 - opiate receptor-like 1, AKR1C3 - aldo-keto reductase family 1, member c3, EMP2 - epithelial membrane protein 2, PRKACB - protein kinase, camp-dependent, catalytic, beta, SLC9A3R1 - solute carrier family 9, subfamily a (nhe3, cation proton antiporter 3), member 3 regulator 1, HSD11B2 - hydroxysteroid (11-beta) dehydrogenase 2, ITGA3 - integrin, alpha 3 (antigen cd49c, alpha 3 subunit of v…
GO:0045087	innate immune response	2.52e-05	0.00462	1.41	14437	323	3508	111	[DHX58 - dexh (asp-glu-x-his) box polypeptide 58, APOBEC3B - apolipoprotein b mrna editing enzyme, catalytic polypeptide-like 3b, CD244 - cd244 molecule, natural killer cell receptor 2b4, UNC93B1 - unc-93 homolog b1 (c. elegans), DDX60 - dead (asp-glu-ala-asp) box polypeptide 60, MIF - macrophage migration inhibitory factor (glycosylation-inhibiting factor), SH2D1B - sh2 domain containing 1b, BST…
GO:0072507	divalent inorganic cation homeostasis	2.66e-05	0.00482	1.44	14437	289	3508	101	[OPRL1 - opiate receptor-like 1, BNIP3 - bcl2/adenovirus e1b 19kda interacting protein 3, SYPL2 - synaptophysin-like 2, TMTC2 - transmembrane and tetratricopeptide repeat containing 2, TRIM24 - tripartite motif containing 24, GPR55 - g protein-coupled receptor 55, DDIT3 - dna-damage-inducible transcript 3, CXCL12 - chemokine (c-x-c motif) ligand 12, ANXA6 - annexin a6, PML - promyelocytic leukemi…
GO:0002688	regulation of leukocyte chemotaxis	2.91e-05	0.0052	1.86	14437	82	3508	37	[LGALS9 - lectin, galactoside-binding, soluble, 9, TRPV4 - transient receptor potential cation channel, subfamily v, member 4, CCR7 - chemokine (c-c motif) receptor 7, CMKLR1 - chemokine-like receptor 1, CXCL9 - chemokine (c-x-c motif) ligand 9, SLIT2 - slit homolog 2 (drosophila), HMGB1 - high mobility group box 1, CXCL12 - chemokine (c-x-c motif) ligand 12, CCR1 - chemokine (c-c motif) receptor…
GO:0097746	regulation of blood vessel diameter	2.95e-05	0.0052	1.84	14437	85	3508	38	[ARHGAP42 - rho gtpase activating protein 42, PTAFR - platelet-activating factor receptor, NOS2 - nitric oxide synthase 2, inducible, SLC6A4 - solute carrier family 6 (neurotransmitter transporter), member 4, ADRA2C - adrenoceptor alpha 2c, ALOX12 - arachidonate 12-lipoxygenase, CHRM3 - cholinergic receptor, muscarinic 3, ITGA1 - integrin, alpha 1, EGFR - epidermal growth factor receptor, ACE - a…
GO:0035296	regulation of tube diameter	2.95e-05	0.00514	1.84	14437	85	3508	38	[ARHGAP42 - rho gtpase activating protein 42, PTAFR - platelet-activating factor receptor, NOS2 - nitric oxide synthase 2, inducible, SLC6A4 - solute carrier family 6 (neurotransmitter transporter), member 4, ADRA2C - adrenoceptor alpha 2c, ALOX12 - arachidonate 12-lipoxygenase, CHRM3 - cholinergic receptor, muscarinic 3, ITGA1 - integrin, alpha 1, EGFR - epidermal growth factor receptor, ACE - a…
GO:0006312	mitotic recombination	2.96e-05	0.00509	2.26	14437	40	3508	22	[POLA2 - polymerase (dna directed), alpha 2, accessory subunit, PCNA - proliferating cell nuclear antigen, RFC4 - replication factor c (activator 1) 4, 37kda, RFC5 - replication factor c (activator 1) 5, 36.5kda, RFC2 - replication factor c (activator 1) 2, 40kda, RFC3 - replication factor c (activator 1) 3, 38kda, RFC1 - replication factor c (activator 1) 1, 145kda, BRCA2 - breast cancer 2, earl…
GO:0030593	neutrophil chemotaxis	3.39e-05	0.00577	2.1	14437	51	3508	26	[ITGA9 - integrin, alpha 9, CCL3L3 - chemokine (c-c motif) ligand 3-like 3, ITGA1 - integrin, alpha 1, AMICA1 - adhesion molecule, interacts with cxadr antigen 1, PPBP - pro-platelet basic protein (chemokine (c-x-c motif) ligand 7), CCL4L2 - chemokine (c-c motif) ligand 4-like 2, S100A12 - s100 calcium binding protein a12, CCL13 - chemokine (c-c motif) ligand 13, TGFB2 - transforming growth facto…
GO:0044259	multicellular organismal macromolecule metabolic process	3.56e-05	0.00599	1.94	14437	68	3508	32	[AKR1C3 - aldo-keto reductase family 1, member c3, ADAMTS3 - adam metallopeptidase with thrombospondin type 1 motif, 3, PRTN3 - proteinase 3, ACE - angiotensin i converting enzyme, COL3A1 - collagen, type iii, alpha 1, COL4A1 - collagen, type iv, alpha 1, TNXB - tenascin xb, CTSL - cathepsin l, MMP1 - matrix metallopeptidase 1 (interstitial collagenase), CTSK - cathepsin k, COL8A1 - collagen, typ…
GO:0048878	chemical homeostasis	3.64e-05	0.00606	1.27	14437	709	3508	218	[BNIP3 - bcl2/adenovirus e1b 19kda interacting protein 3, SYPL2 - synaptophysin-like 2, PQLC2 - pq loop repeat containing 2, TMTC2 - transmembrane and tetratricopeptide repeat containing 2, TRIM24 - tripartite motif containing 24, ABCA2 - atp-binding cassette, sub-family a (abc1), member 2, CP - ceruloplasmin (ferroxidase), SLC9C2 - solute carrier family 9, member c2 (putative), PML - promyelocyt…
GO:0030574	collagen catabolic process	3.77e-05	0.00618	2.06	14437	54	3508	27	[ADAMTS3 - adam metallopeptidase with thrombospondin type 1 motif, 3, PRTN3 - proteinase 3, COL3A1 - collagen, type iii, alpha 1, COL4A1 - collagen, type iv, alpha 1, CTSL - cathepsin l, MMP1 - matrix metallopeptidase 1 (interstitial collagenase), CTSK - cathepsin k, COL8A1 - collagen, type viii, alpha 1, MMP7 - matrix metallopeptidase 7 (matrilysin, uterine), COL6A2 - collagen, type vi, alpha 2,…
GO:0006334	nucleosome assembly	3.77e-05	0.00613	1.73	14437	107	3508	45	[HIST1H3D - histone cluster 1, h3d, HIST1H2BD - histone cluster 1, h2bd, CENPA - centromere protein a, HAT1 - histone acetyltransferase 1, HIST2H2BF - histone cluster 2, h2bf, H2AFX - h2a histone family, member x, HIST1H4I - histone cluster 1, h4i, HIST1H2BC - histone cluster 1, h2bc, ITGB3BP - integrin beta 3 binding protein (beta3-endonexin), HIST1H2BO - histone cluster 1, h2bo, HIST2H2BE - his…
GO:0050801	ion homeostasis	3.85e-05	0.00618	1.33	14437	481	3508	155	[OPRL1 - opiate receptor-like 1, BNIP3 - bcl2/adenovirus e1b 19kda interacting protein 3, SYPL2 - synaptophysin-like 2, PQLC2 - pq loop repeat containing 2, TMTC2 - transmembrane and tetratricopeptide repeat containing 2, TRIM24 - tripartite motif containing 24, GPR55 - g protein-coupled receptor 55, DDIT3 - dna-damage-inducible transcript 3, CXCL12 - chemokine (c-x-c motif) ligand 12, SLC34A3 - …
GO:0030799	regulation of cyclic nucleotide metabolic process	3.92e-05	0.00622	1.75	14437	101	3508	43	[OPRL1 - opiate receptor-like 1, LTB4R2 - leukotriene b4 receptor 2, NOS2 - nitric oxide synthase 2, inducible, MRAP2 - melanocortin 2 receptor accessory protein 2, CXCL9 - chemokine (c-x-c motif) ligand 9, GALR1 - galanin receptor 1, AKAP12 - a kinase (prka) anchor protein 12, CCR2 - chemokine (c-c motif) receptor 2, ADCY6 - adenylate cyclase 6, HTR1B - 5-hydroxytryptamine (serotonin) receptor 1…
GO:0032649	regulation of interferon-gamma production	3.92e-05	0.00615	1.87	14437	77	3508	35	[LGALS9 - lectin, galactoside-binding, soluble, 9, SASH3 - sam and sh3 domain containing 3, CCR7 - chemokine (c-c motif) receptor 7, FZD5 - frizzled family receptor 5, IL20RB - interleukin 20 receptor beta, CD244 - cd244 molecule, natural killer cell receptor 2b4, LTA - lymphotoxin alpha, HMGB1 - high mobility group box 1, IL12B - interleukin 12b (natural killer cell stimulatory factor 2, cytotox…
GO:0043270	positive regulation of ion transport	3.99e-05	0.00619	1.56	14437	174	3508	66	[GSTM2 - glutathione s-transferase mu 2 (muscle), ATP2B2 - atpase, ca++ transporting, plasma membrane 2, CHRNB2 - cholinergic receptor, nicotinic, beta 2 (neuronal), RNF207 - ring finger protein 207, SLC6A4 - solute carrier family 6 (neurotransmitter transporter), member 4, CXCL9 - chemokine (c-x-c motif) ligand 9, MIF - macrophage migration inhibitory factor (glycosylation-inhibiting factor), CX…
GO:0071621	granulocyte chemotaxis	4.11e-05	0.00631	2.02	14437	57	3508	28	[ITGA9 - integrin, alpha 9, CCL3L3 - chemokine (c-c motif) ligand 3-like 3, SCG2 - secretogranin ii, ITGA1 - integrin, alpha 1, HRH1 - histamine receptor h1, AMICA1 - adhesion molecule, interacts with cxadr antigen 1, PPBP - pro-platelet basic protein (chemokine (c-x-c motif) ligand 7), CCL4L2 - chemokine (c-c motif) ligand 4-like 2, S100A12 - s100 calcium binding protein a12, CCL13 - chemokine (…
GO:0006260	DNA replication	4.2e-05	0.00638	1.59	14437	158	3508	61	[CDC6 - cell division cycle 6, DONSON - downstream neighbor of son, RFC4 - replication factor c (activator 1) 4, 37kda, CDC25A - cell division cycle 25a, RFC5 - replication factor c (activator 1) 5, 36.5kda, RFC2 - replication factor c (activator 1) 2, 40kda, RFC3 - replication factor c (activator 1) 3, 38kda, CDK1 - cyclin-dependent kinase 1, RFC1 - replication factor c (activator 1) 1, 145kda, …
GO:0042481	regulation of odontogenesis	4.78e-05	0.00718	2.74	14437	21	3508	14	[CSF1 - colony stimulating factor 1 (macrophage), SHH - sonic hedgehog, TFAP2A - transcription factor ap-2 alpha (activating enhancer binding protein 2 alpha), DMRT3 - doublesex and mab-3 related transcription factor 3, PAX9 - paired box 9, FGF8 - fibroblast growth factor 8 (androgen-induced), AMELX - amelogenin, x-linked, DMP1 - dentin matrix acidic phosphoprotein 1, BMP2 - bone morphogenetic pr…
GO:0055065	metal ion homeostasis	4.91e-05	0.0073	1.36	14437	380	3508	126	[OPRL1 - opiate receptor-like 1, BNIP3 - bcl2/adenovirus e1b 19kda interacting protein 3, SYPL2 - synaptophysin-like 2, TMTC2 - transmembrane and tetratricopeptide repeat containing 2, TRIM24 - tripartite motif containing 24, GPR55 - g protein-coupled receptor 55, DDIT3 - dna-damage-inducible transcript 3, CXCL12 - chemokine (c-x-c motif) ligand 12, CP - ceruloplasmin (ferroxidase), ANXA6 - annex…
GO:0050727	regulation of inflammatory response	5.19e-05	0.00763	1.46	14437	242	3508	86	[FAM132A - family with sequence similarity 132, member a, TRPV4 - transient receptor potential cation channel, subfamily v, member 4, CCL3L3 - chemokine (c-c motif) ligand 3-like 3, BIRC3 - baculoviral iap repeat containing 3, NOS2 - nitric oxide synthase 2, inducible, F12 - coagulation factor xii (hageman factor), FABP4 - fatty acid binding protein 4, adipocyte, IL12B - interleukin 12b (natural …
GO:0006959	humoral immune response	5.45e-05	0.00794	1.77	14437	93	3508	40	[HIST1H2BC - histone cluster 1, h2bc, HIST2H2BE - histone cluster 2, h2be, LTA - lymphotoxin alpha, PAX5 - paired box 5, BLNK - b-cell linker, AZU1 - azurocidin 1, TNFRSF21 - tumor necrosis factor receptor superfamily, member 21, BST2 - bone marrow stromal cell antigen 2, HLA-DQB1 - major histocompatibility complex, class ii, dq beta 1, CLU - clusterin, HIST1H2BF - histone cluster 1, h2bf, SEMG1 …
GO:0097529	myeloid leukocyte migration	5.53e-05	0.00797	1.81	14437	84	3508	37	[ITGA9 - integrin, alpha 9, CCL3L3 - chemokine (c-c motif) ligand 3-like 3, CCR7 - chemokine (c-c motif) receptor 7, SCG2 - secretogranin ii, ROR2 - receptor tyrosine kinase-like orphan receptor 2, ITGA1 - integrin, alpha 1, AZU1 - azurocidin 1, PDGFB - platelet-derived growth factor beta polypeptide, HRH1 - histamine receptor h1, AMICA1 - adhesion molecule, interacts with cxadr antigen 1, PPBP -…
GO:0002684	positive regulation of immune system process	5.86e-05	0.00837	1.25	14437	725	3508	221	[LGALS9 - lectin, galactoside-binding, soluble, 9, LAX1 - lymphocyte transmembrane adaptor 1, LILRB2 - leukocyte immunoglobulin-like receptor, subfamily b (with tm and itim domains), member 2, SPTA1 - spectrin, alpha, erythrocytic 1 (elliptocytosis 2), DHX58 - dexh (asp-glu-x-his) box polypeptide 58, DDX60 - dead (asp-glu-ala-asp) box polypeptide 60, UNC93B1 - unc-93 homolog b1 (c. elegans), MADC…
GO:0040011	locomotion	5.9e-05	0.00834	1.25	14437	762	3508	231	[LGALS9 - lectin, galactoside-binding, soluble, 9, MDGA1 - mam domain containing glycosylphosphatidylinositol anchor 1, EMP2 - epithelial membrane protein 2, FAM83D - family with sequence similarity 83, member d, SEMA4C - sema domain, immunoglobulin domain (ig), transmembrane domain (tm) and short cytoplasmic domain, (semaphorin) 4c, SPOCK1 - sparc/osteonectin, cwcv and kazal-like domains proteog…
GO:0050918	positive chemotaxis	6.01e-05	0.0084	2.39	14437	31	3508	18	[SCG2 - secretogranin ii, VEGFA - vascular endothelial growth factor a, VEGFC - vascular endothelial growth factor c, CCL15 - chemokine (c-c motif) ligand 15, CCL5 - chemokine (c-c motif) ligand 5, FGF10 - fibroblast growth factor 10, MET - met proto-oncogene, HMGB2 - high mobility group box 2, HMGB1 - high mobility group box 1, MIF - macrophage migration inhibitory factor (glycosylation-inhibiti…
GO:0048731	system development	6.3e-05	0.00873	1.31	14437	514	3508	163	[GPR124 - g protein-coupled receptor 124, GFRA2 - gdnf family receptor alpha 2, ZEB1 - zinc finger e-box binding homeobox 1, FLT4 - fms-related tyrosine kinase 4, SPOCK1 - sparc/osteonectin, cwcv and kazal-like domains proteoglycan (testican) 1, GDNF - glial cell derived neurotrophic factor, BTD - biotinidase, INHBA - inhibin, beta a, PBX1 - pre-b-cell leukemia homeobox 1, GDA - guanine deaminase…
GO:0051924	regulation of calcium ion transport	6.46e-05	0.00886	1.57	14437	160	3508	61	[GSTM2 - glutathione s-transferase mu 2 (muscle), OPRL1 - opiate receptor-like 1, LILRB2 - leukocyte immunoglobulin-like receptor, subfamily b (with tm and itim domains), member 2, ATP2B2 - atpase, ca++ transporting, plasma membrane 2, CXCL9 - chemokine (c-x-c motif) ligand 9, CXCL12 - chemokine (c-x-c motif) ligand 12, CAMK2D - calcium/calmodulin-dependent protein kinase ii delta, NOS1AP - nitri…
GO:1903524	positive regulation of blood circulation	6.48e-05	0.0088	1.96	14437	61	3508	29	[PTAFR - platelet-activating factor receptor, NOS2 - nitric oxide synthase 2, inducible, RNF207 - ring finger protein 207, ADRA2C - adrenoceptor alpha 2c, ALOX12 - arachidonate 12-lipoxygenase, NOS1AP - nitric oxide synthase 1 (neuronal) adaptor protein, CTGF - connective tissue growth factor, EGFR - epidermal growth factor receptor, AGT - angiotensinogen (serpin peptidase inhibitor, clade a, mem…
GO:0007193	adenylate cyclase-inhibiting G-protein coupled receptor signaling pathway	7.25e-05	0.00975	2.06	14437	50	3508	25	[OPRL1 - opiate receptor-like 1, CHRM3 - cholinergic receptor, muscarinic 3, CHRM4 - cholinergic receptor, muscarinic 4, CHRM5 - cholinergic receptor, muscarinic 5, HTR2C - 5-hydroxytryptamine (serotonin) receptor 2c, g protein-coupled, SSTR2 - somatostatin receptor 2, PTGDR2 - prostaglandin d2 receptor 2, HTR1B - 5-hydroxytryptamine (serotonin) receptor 1b, g protein-coupled, ADCY6 - adenylate c…
GO:0060337	type I interferon signaling pathway	7.25e-05	0.00966	2.06	14437	50	3508	25	[IFITM1 - interferon induced transmembrane protein 1, IFIT2 - interferon-induced protein with tetratricopeptide repeats 2, IFIT1 - interferon-induced protein with tetratricopeptide repeats 1, IFIT3 - interferon-induced protein with tetratricopeptide repeats 3, IRF9 - interferon regulatory factor 9, OASL - 2'-5'-oligoadenylate synthetase-like, IFI27 - interferon, alpha-inducible protein 27, HLA-F …
GO:0070374	positive regulation of ERK1 and ERK2 cascade	7.41e-05	0.00978	1.61	14437	138	3508	54	[LGALS9 - lectin, galactoside-binding, soluble, 9, TRPV4 - transient receptor potential cation channel, subfamily v, member 4, CCL3L3 - chemokine (c-c motif) ligand 3-like 3, CYSLTR2 - cysteinyl leukotriene receptor 2, GPR55 - g protein-coupled receptor 55, FLT4 - fms-related tyrosine kinase 4, MIF - macrophage migration inhibitory factor (glycosylation-inhibiting factor), HMGB1 - high mobility g…
GO:0008016	regulation of heart contraction	7.53e-05	0.00985	1.56	14437	164	3508	62	[FXYD2 - fxyd domain containing ion transport regulator 2, GSTM2 - glutathione s-transferase mu 2 (muscle), ATP2A1 - atpase, ca++ transporting, cardiac muscle, fast twitch 1, ATP2B2 - atpase, ca++ transporting, plasma membrane 2, RNF207 - ring finger protein 207, SPTBN4 - spectrin, beta, non-erythrocytic 4, NOS1AP - nitric oxide synthase 1 (neuronal) adaptor protein, CAMK2D - calcium/calmodulin-d…
GO:0050920	regulation of chemotaxis	7.58e-05	0.00982	1.58	14437	151	3508	58	[LGALS9 - lectin, galactoside-binding, soluble, 9, GPR124 - g protein-coupled receptor 124, TRPV4 - transient receptor potential cation channel, subfamily v, member 4, SEMA4C - sema domain, immunoglobulin domain (ig), transmembrane domain (tm) and short cytoplasmic domain, (semaphorin) 4c, CXCL9 - chemokine (c-x-c motif) ligand 9, HMGB1 - high mobility group box 1, CXCL12 - chemokine (c-x-c motif…
GO:0035456	response to interferon-beta	7.74e-05	0.00995	2.57	14437	24	3508	15	[IFITM1 - interferon induced transmembrane protein 1, IFITM3 - interferon induced transmembrane protein 3, PNPT1 - polyribonucleotide nucleotidyltransferase 1, STAT1 - signal transducer and activator of transcription 1, 91kda, IRGM - immunity-related gtpase family, m, IFITM2 - interferon induced transmembrane protein 2, TRIM6 - tripartite motif containing 6, PLSCR1 - phospholipid scramblase 1, XA…
GO:0009617	response to bacterium	8.4e-05	0.0107	1.59	14437	145	3508	56	[HIST1H2BC - histone cluster 1, h2bc, HIST2H2BE - histone cluster 2, h2be, NOS2 - nitric oxide synthase 2, inducible, PRG2 - proteoglycan 2, bone marrow (natural killer cell activator, eosinophil granule major basic protein), HMGB2 - high mobility group box 2, ADAMTS5 - adam metallopeptidase with thrombospondin type 1 motif, 5, IL12B - interleukin 12b (natural killer cell stimulatory factor 2, cy…
GO:0042742	defense response to bacterium	8.89e-05	0.0112	1.63	14437	126	3508	50	[HIST1H2BC - histone cluster 1, h2bc, HIST2H2BE - histone cluster 2, h2be, NOS2 - nitric oxide synthase 2, inducible, PRG2 - proteoglycan 2, bone marrow (natural killer cell activator, eosinophil granule major basic protein), HMGB2 - high mobility group box 2, ADAMTS5 - adam metallopeptidase with thrombospondin type 1 motif, 5, IL12B - interleukin 12b (natural killer cell stimulatory factor 2, cy…
GO:0070372	regulation of ERK1 and ERK2 cascade	9e-05	0.0112	1.5	14437	198	3508	72	[LGALS9 - lectin, galactoside-binding, soluble, 9, TRPV4 - transient receptor potential cation channel, subfamily v, member 4, FAM83D - family with sequence similarity 83, member d, CYSLTR2 - cysteinyl leukotriene receptor 2, CCL3L3 - chemokine (c-c motif) ligand 3-like 3, TIMP3 - timp metallopeptidase inhibitor 3, FN1 - fibronectin 1, GPR55 - g protein-coupled receptor 55, PTPRR - protein tyrosi…
GO:0070192	chromosome organization involved in meiotic cell cycle	9.07e-05	0.0112	2.1	14437	45	3508	23	[MSH4 - muts homolog 4 (e. coli), SYCE1L - synaptonemal complex central element protein 1-like, C17orf104 - chromosome 17 open reading frame 104, TRIP13 - thyroid hormone receptor interactor 13, SYCE2 - synaptonemal complex central element protein 2, CCNE2 - cyclin e2, NCAPD3 - non-smc condensin ii complex, subunit d3, SYCP1 - synaptonemal complex protein 1, CCNE1 - cyclin e1, NCAPD2 - non-smc co…
GO:0070167	regulation of biomineral tissue development	9.36e-05	0.0115	1.92	14437	62	3508	29	[BMP2K - bmp2 inducible kinase, PHOSPHO1 - phosphatase, orphan 1, KL - klotho, ACVR2A - activin a receptor, type iia, TFAP2A - transcription factor ap-2 alpha (activating enhancer binding protein 2 alpha), DDR2 - discoidin domain receptor tyrosine kinase 2, CCR1 - chemokine (c-c motif) receptor 1, WNT10B - wingless-type mmtv integration site family, member 10b, AMELX - amelogenin, x-linked, ISG15…
GO:0010463	mesenchymal cell proliferation	9.65e-05	0.0117	3.17	14437	13	3508	10	[BMP2 - bone morphogenetic protein 2, DCHS1 - dachsous 1 (drosophila), GPC3 - glypican 3, MSX1 - msh homeobox 1, SHH - sonic hedgehog, STAT1 - signal transducer and activator of transcription 1, 91kda, BMP4 - bone morphogenetic protein 4, BMP7 - bone morphogenetic protein 7, SIX2 - six homeobox 2, FGF7 - fibroblast growth factor 7]
GO:0032963	collagen metabolic process	9.69e-05	0.0117	1.9	14437	65	3508	30	[ADAMTS3 - adam metallopeptidase with thrombospondin type 1 motif, 3, PRTN3 - proteinase 3, COL3A1 - collagen, type iii, alpha 1, COL4A1 - collagen, type iv, alpha 1, TNXB - tenascin xb, CTSL - cathepsin l, MMP1 - matrix metallopeptidase 1 (interstitial collagenase), CTSK - cathepsin k, COL8A1 - collagen, type viii, alpha 1, MMP7 - matrix metallopeptidase 7 (matrilysin, uterine), COL6A2 - collage…
GO:0044699	single-organism process	9.83e-05	0.0118	1.05	14437	8350	3508	2124	[A1BG - alpha-1-b glycoprotein, CATSPER2 - cation channel, sperm associated 2, SEPT5 - septin 5, ABCA2 - atp-binding cassette, sub-family a (abc1), member 2, SEPT4 - septin 4, SH2D1B - sh2 domain containing 1b, PLXNB3 - plexin b3, PNOC - prepronociceptin, PML - promyelocytic leukemia, PMM2 - phosphomannomutase 2, NAGK - n-acetylglucosamine kinase, ACACB - acetyl-coa carboxylase beta, CHRNA9 - cho…
polypeptide-like 3g, CTSL - cathepsin l, CTSK - cathepsin k, STXBP1 - syntaxin binding protein 1, PSRC1 - proline/serine-rich coiled-coil 1, CTSG - cathepsin g, CTSE - cathepsin e, SYCE2 - synaptonemal complex central element protein 2, COL6A5 - collagen, type vi, alpha 5, BACH2 - btb and cnc homology 1, basic leucine zipper transcription factor 2, FLRT1 - fibronectin leucine rich transmembrane p…
hway protein 1, GGH - gamma-glutamyl hydrolase (conjugase, folylpolygammaglutamyl hydrolase), TRPM8 - transient receptor potential cation channel, subfamily m, member 8, KCTD15 - potassium channel tetramerization domain containing 15, SECISBP2 - secis binding protein 2, HPD - 4-hydroxyphenylpyruvate dioxygenase, HOXD11 - homeobox d11, MLPH - melanophilin, HOXD8 - homeobox d8, APOBEC3F - apolipopr…
m23 nucleoside diphosphate kinase 4, NOTCH4 - notch 4, HERPUD1 - homocysteine-inducible, endoplasmic reticulum stress-inducible, ubiquitin-like domain member 1, TBX21 - t-box 21, CNOT2 - ccr4-not transcription complex, subunit 2, NOS3 - nitric oxide synthase 3 (endothelial cell), AMOTL1 - angiomotin like 1, NOTCH2 - notch 2, KCNIP3 - kv channel interacting protein 3, calsenilin, ERVW-1 - endogeno…
GO:0001503	ossification	9.85e-05	0.0117	1.74	14437	92	3508	39	[IFITM1 - interferon induced transmembrane protein 1, TEK - tek tyrosine kinase, endothelial, DCHS1 - dachsous 1 (drosophila), ALOX15 - arachidonate 15-lipoxygenase, PHOSPHO1 - phosphatase, orphan 1, FGFR3 - fibroblast growth factor receptor 3, DDR2 - discoidin domain receptor tyrosine kinase 2, PAM16 - presequence translocase-associated motor 16 homolog (s. cerevisiae), CTGF - connective tissue …
GO:0048562	embryonic organ morphogenesis	0.0001	0.0118	1.76	14437	89	3508	38	[NEUROD1 - neuronal differentiation 1, PITX2 - paired-like homeodomain 2, HOXA11 - homeobox a11, FZD5 - frizzled family receptor 5, HOXB3 - homeobox b3, SHH - sonic hedgehog, FGF10 - fibroblast growth factor 10, ZEB1 - zinc finger e-box binding homeobox 1, PAX5 - paired box 5, TFAP2A - transcription factor ap-2 alpha (activating enhancer binding protein 2 alpha), HOXB6 - homeobox b6, ROR2 - recep…
GO:0009187	cyclic nucleotide metabolic process	0.000101	0.0117	2.06	14437	48	3508	24	[ADCY10 - adenylate cyclase 10 (soluble), PDE9A - phosphodiesterase 9a, RORA - rar-related orphan receptor a, ATP2B2 - atpase, ca++ transporting, plasma membrane 2, ADCY9 - adenylate cyclase 9, GUCY1A3 - guanylate cyclase 1, soluble, alpha 3, NPR1 - natriuretic peptide receptor a/guanylate cyclase a (atrionatriuretic peptide receptor a), PDE7B - phosphodiesterase 7b, NPPC - natriuretic peptide c,…
GO:0007610	behavior	0.000103	0.0119	1.35	14437	368	3508	121	[OPRL1 - opiate receptor-like 1, AFF2 - af4/fmr2 family, member 2, NPAS4 - neuronal pas domain protein 4, GPR52 - g protein-coupled receptor 52, PAX5 - paired box 5, SPTBN4 - spectrin, beta, non-erythrocytic 4, CXCL12 - chemokine (c-x-c motif) ligand 12, GDNF - glial cell derived neurotrophic factor, ATXN3 - ataxin 3, GCNT4 - glucosaminyl (n-acetyl) transferase 4, core 2, HRH1 - histamine recepto…
GO:0098771	inorganic ion homeostasis	0.000106	0.0122	1.31	14437	461	3508	147	[OPRL1 - opiate receptor-like 1, BNIP3 - bcl2/adenovirus e1b 19kda interacting protein 3, SYPL2 - synaptophysin-like 2, TMTC2 - transmembrane and tetratricopeptide repeat containing 2, TRIM24 - tripartite motif containing 24, GPR55 - g protein-coupled receptor 55, DDIT3 - dna-damage-inducible transcript 3, CXCL12 - chemokine (c-x-c motif) ligand 12, SLC34A3 - solute carrier family 34 (type ii sod…
GO:0055074	calcium ion homeostasis	0.000107	0.0122	1.42	14437	267	3508	92	[OPRL1 - opiate receptor-like 1, ATP2A1 - atpase, ca++ transporting, cardiac muscle, fast twitch 1, TRPV4 - transient receptor potential cation channel, subfamily v, member 4, SYPL2 - synaptophysin-like 2, BNIP3 - bcl2/adenovirus e1b 19kda interacting protein 3, CHRNA7 - cholinergic receptor, nicotinic, alpha 7 (neuronal), ATP2B2 - atpase, ca++ transporting, plasma membrane 2, TMTC2 - transmembra…
GO:0050678	regulation of epithelial cell proliferation	0.000119	0.0135	1.45	14437	230	3508	81	[BRCA2 - breast cancer 2, early onset, FLT4 - fms-related tyrosine kinase 4, CDH3 - cadherin 3, type 1, p-cadherin (placental), HMGB2 - high mobility group box 2, NME2 - nme/nm23 nucleoside diphosphate kinase 2, CXCL12 - chemokine (c-x-c motif) ligand 12, PTPRN - protein tyrosine phosphatase, receptor type, n, WNT10B - wingless-type mmtv integration site family, member 10b, PLXNB3 - plexin b3, ES…
GO:0070887	cellular response to chemical stimulus	0.00012	0.0134	1.2	14437	1074	3508	312	[RGS19 - regulator of g-protein signaling 19, LGALS9 - lectin, galactoside-binding, soluble, 9, LILRB2 - leukocyte immunoglobulin-like receptor, subfamily b (with tm and itim domains), member 2, BNIP3 - bcl2/adenovirus e1b 19kda interacting protein 3, BNIP3L - bcl2/adenovirus e1b 19kda interacting protein 3-like, NPAS4 - neuronal pas domain protein 4, HVCN1 - hydrogen voltage-gated channel 1, TRI…
GO:0006875	cellular metal ion homeostasis	0.000121	0.0135	1.37	14437	334	3508	111	[OPRL1 - opiate receptor-like 1, BNIP3 - bcl2/adenovirus e1b 19kda interacting protein 3, SYPL2 - synaptophysin-like 2, GPR55 - g protein-coupled receptor 55, DDIT3 - dna-damage-inducible transcript 3, CXCL12 - chemokine (c-x-c motif) ligand 12, CP - ceruloplasmin (ferroxidase), ANXA6 - annexin a6, PML - promyelocytic leukemia, CHRNA9 - cholinergic receptor, nicotinic, alpha 9 (neuronal), TRPC1 -…
GO:0001819	positive regulation of cytokine production	0.000122	0.0135	1.38	14437	313	3508	105	[LGALS9 - lectin, galactoside-binding, soluble, 9, LILRB2 - leukocyte immunoglobulin-like receptor, subfamily b (with tm and itim domains), member 2, DHX58 - dexh (asp-glu-x-his) box polypeptide 58, SASH3 - sam and sh3 domain containing 3, CD244 - cd244 molecule, natural killer cell receptor 2b4, DDIT3 - dna-damage-inducible transcript 3, BRCA1 - breast cancer 1, early onset, FLT4 - fms-related t…
GO:0050921	positive regulation of chemotaxis	0.000124	0.0135	1.7	14437	99	3508	41	[LGALS9 - lectin, galactoside-binding, soluble, 9, TRPV4 - transient receptor potential cation channel, subfamily v, member 4, CCR7 - chemokine (c-c motif) receptor 7, SCG2 - secretogranin ii, CMKLR1 - chemokine-like receptor 1, FGF10 - fibroblast growth factor 10, SLIT2 - slit homolog 2 (drosophila), CXCL9 - chemokine (c-x-c motif) ligand 9, ITGA2 - integrin, alpha 2 (cd49b, alpha 2 subunit of v…
GO:0007188	adenylate cyclase-modulating G-protein coupled receptor signaling pathway	0.000127	0.0138	1.71	14437	96	3508	40	[GRK5 - g protein-coupled receptor kinase 5, OPRL1 - opiate receptor-like 1, PRKACB - protein kinase, camp-dependent, catalytic, beta, GPR52 - g protein-coupled receptor 52, SLC9A3R1 - solute carrier family 9, subfamily a (nhe3, cation proton antiporter 3), member 3 regulator 1, ADRA2C - adrenoceptor alpha 2c, CHRM3 - cholinergic receptor, muscarinic 3, GALR1 - galanin receptor 1, CHRM4 - choline…
GO:0098813	nuclear chromosome segregation	0.00013	0.0141	2.23	14437	35	3508	19	[DSN1 - dsn1, mis12 kinetochore complex component, CENPA - centromere protein a, PLK1 - polo-like kinase 1, NEK2 - nima-related kinase 2, MAD2L1 - mad2 mitotic arrest deficient-like 1 (yeast), SGOL1 - shugoshin-like 1 (s. pombe), NUSAP1 - nucleolar and spindle associated protein 1, NDC80 - ndc80 kinetochore complex component, TTK - ttk protein kinase, SPAG5 - sperm associated antigen 5, KIFC1 - k…
GO:0051781	positive regulation of cell division	0.000134	0.0143	1.89	14437	63	3508	29	[CDC6 - cell division cycle 6, KIF14 - kinesin family member 14, EREG - epiregulin, KIF20B - kinesin family member 20b, SHH - sonic hedgehog, MDK - midkine (neurite growth-promoting factor 2), AURKB - aurora kinase b, CDC25B - cell division cycle 25b, FGF5 - fibroblast growth factor 5, FGF8 - fibroblast growth factor 8 (androgen-induced), RACGAP1 - rac gtpase activating protein 1, FGF7 - fibrobla…
GO:0009887	animal organ morphogenesis	0.000136	0.0144	1.35	14437	356	3508	117	[PAX5 - paired box 5, ZEB1 - zinc finger e-box binding homeobox 1, PAX9 - paired box 9, GCNT1 - glucosaminyl (n-acetyl) transferase 1, core 2, INHBA - inhibin, beta a, GCNT4 - glucosaminyl (n-acetyl) transferase 4, core 2, PCGF2 - polycomb group ring finger 2, ERRFI1 - erbb receptor feedback inhibitor 1, AQP3 - aquaporin 3 (gill blood group), P2RX7 - purinergic receptor p2x, ligand-gated ion chan…
GO:0051174	regulation of phosphorus metabolic process	0.000138	0.0145	1.17	14437	1335	3508	380	[LGALS9 - lectin, galactoside-binding, soluble, 9, LAX1 - lymphocyte transmembrane adaptor 1, EMP2 - epithelial membrane protein 2, FAM83D - family with sequence similarity 83, member d, GFRA2 - gdnf family receptor alpha 2, SEMA4C - sema domain, immunoglobulin domain (ig), transmembrane domain (tm) and short cytoplasmic domain, (semaphorin) 4c, SPTBN4 - spectrin, beta, non-erythrocytic 4, AKAP12…
GO:0071346	cellular response to interferon-gamma	0.00014	0.0146	2.06	14437	46	3508	23	[LGALS9 - lectin, galactoside-binding, soluble, 9, CCL3L3 - chemokine (c-c motif) ligand 3-like 3, CCL13 - chemokine (c-c motif) ligand 13, CCL15 - chemokine (c-c motif) ligand 15, STAR - steroidogenic acute regulatory protein, NOS2 - nitric oxide synthase 2, inducible, CCL5 - chemokine (c-c motif) ligand 5, CCL4 - chemokine (c-c motif) ligand 4, CCL8 - chemokine (c-c motif) ligand 8, CCL7 - chem…
GO:0044236	multicellular organism metabolic process	0.00014	0.0146	1.79	14437	78	3508	34	[AKR1C3 - aldo-keto reductase family 1, member c3, TRPV4 - transient receptor potential cation channel, subfamily v, member 4, ADAMTS3 - adam metallopeptidase with thrombospondin type 1 motif, 3, PRTN3 - proteinase 3, ACE - angiotensin i converting enzyme, COL3A1 - collagen, type iii, alpha 1, COL4A1 - collagen, type iv, alpha 1, TNXB - tenascin xb, CTSL - cathepsin l, MMP1 - matrix metallopeptid…
GO:0002682	regulation of immune system process	0.000141	0.0145	1.19	14437	1099	3508	318	[LAX1 - lymphocyte transmembrane adaptor 1, LGALS9 - lectin, galactoside-binding, soluble, 9, LILRB2 - leukocyte immunoglobulin-like receptor, subfamily b (with tm and itim domains), member 2, SPTA1 - spectrin, alpha, erythrocytic 1 (elliptocytosis 2), DHX58 - dexh (asp-glu-x-his) box polypeptide 58, UNC93B1 - unc-93 homolog b1 (c. elegans), DDX60 - dead (asp-glu-ala-asp) box polypeptide 60, CD27…
GO:0010959	regulation of metal ion transport	0.000141	0.0144	1.42	14437	255	3508	88	[FXYD2 - fxyd domain containing ion transport regulator 2, OPRL1 - opiate receptor-like 1, GSTM2 - glutathione s-transferase mu 2 (muscle), LILRB2 - leukocyte immunoglobulin-like receptor, subfamily b (with tm and itim domains), member 2, ATP2B2 - atpase, ca++ transporting, plasma membrane 2, RNF207 - ring finger protein 207, SPTBN4 - spectrin, beta, non-erythrocytic 4, CXCL9 - chemokine (c-x-c m…
GO:0001932	regulation of protein phosphorylation	0.000149	0.0151	1.19	14437	1077	3508	312	[LAX1 - lymphocyte transmembrane adaptor 1, LGALS9 - lectin, galactoside-binding, soluble, 9, EMP2 - epithelial membrane protein 2, FAM83D - family with sequence similarity 83, member d, GFRA2 - gdnf family receptor alpha 2, SEMA4C - sema domain, immunoglobulin domain (ig), transmembrane domain (tm) and short cytoplasmic domain, (semaphorin) 4c, SPTBN4 - spectrin, beta, non-erythrocytic 4, CARD14…
GO:0008217	regulation of blood pressure	0.000161	0.0162	1.69	14437	100	3508	41	[ARHGAP42 - rho gtpase activating protein 42, OPRL1 - opiate receptor-like 1, PTAFR - platelet-activating factor receptor, NOS2 - nitric oxide synthase 2, inducible, F11R - f11 receptor, HSD11B2 - hydroxysteroid (11-beta) dehydrogenase 2, DLL1 - delta-like 1 (drosophila), ACE - angiotensin i converting enzyme, NTSR1 - neurotensin receptor 1 (high affinity), AGT - angiotensinogen (serpin peptidase…
GO:0048584	positive regulation of response to stimulus	0.000162	0.0163	1.15	14437	1607	3508	450	[LGALS9 - lectin, galactoside-binding, soluble, 9, DDX60 - dead (asp-glu-ala-asp) box polypeptide 60, TNFRSF12A - tumor necrosis factor receptor superfamily, member 12a, AKAP12 - a kinase (prka) anchor protein 12, SEPT4 - septin 4, SH2D1B - sh2 domain containing 1b, CARD11 - caspase recruitment domain family, member 11, GCNT2 - glucosaminyl (n-acetyl) transferase 2, i-branching enzyme (i blood gr…
GO:0006271	DNA strand elongation involved in DNA replication	0.000171	0.017	2.74	14437	18	3508	12	[POLA2 - polymerase (dna directed), alpha 2, accessory subunit, PARP2 - poly (adp-ribose) polymerase 2, PCNA - proliferating cell nuclear antigen, RFC4 - replication factor c (activator 1) 4, 37kda, POLE - polymerase (dna directed), epsilon, catalytic subunit, POLD1 - polymerase (dna directed), delta 1, catalytic subunit, RFC3 - replication factor c (activator 1) 3, 38kda, POLA1 - polymerase (dna…
GO:0031109	microtubule polymerization or depolymerization	0.000171	0.0169	2.74	14437	18	3508	12	[KIF24 - kinesin family member 24, TRPV4 - transient receptor potential cation channel, subfamily v, member 4, CCSAP - centriole, cilia and spindle-associated protein, FBXO5 - f-box protein 5, STMN1 - stathmin 1, FGF13 - fibroblast growth factor 13, HDGFRP3 - hepatoma-derived growth factor, related protein 3, KIF18B - kinesin family member 18b, KIF2C - kinesin family member 2c, KIF18A - kinesin f…
GO:1990266	neutrophil migration	0.000171	0.0168	1.95	14437	55	3508	26	[ITGA9 - integrin, alpha 9, CCL3L3 - chemokine (c-c motif) ligand 3-like 3, ITGA1 - integrin, alpha 1, AMICA1 - adhesion molecule, interacts with cxadr antigen 1, PPBP - pro-platelet basic protein (chemokine (c-x-c motif) ligand 7), CCL4L2 - chemokine (c-c motif) ligand 4-like 2, S100A12 - s100 calcium binding protein a12, CCL13 - chemokine (c-c motif) ligand 13, TGFB2 - transforming growth facto…
GO:0030500	regulation of bone mineralization	0.000179	0.0174	1.92	14437	58	3508	27	[BMP2K - bmp2 inducible kinase, PHOSPHO1 - phosphatase, orphan 1, KL - klotho, ACVR2A - activin a receptor, type iia, TFAP2A - transcription factor ap-2 alpha (activating enhancer binding protein 2 alpha), DDR2 - discoidin domain receptor tyrosine kinase 2, CCR1 - chemokine (c-c motif) receptor 1, WNT10B - wingless-type mmtv integration site family, member 10b, ISG15 - isg15 ubiquitin-like modifi…
GO:0071674	mononuclear cell migration	0.000181	0.0175	2.24	14437	33	3508	18	[S100A12 - s100 calcium binding protein a12, CCL3L3 - chemokine (c-c motif) ligand 3-like 3, CCL13 - chemokine (c-c motif) ligand 13, CCL15 - chemokine (c-c motif) ligand 15, CCL5 - chemokine (c-c motif) ligand 5, CCL4 - chemokine (c-c motif) ligand 4, CCL8 - chemokine (c-c motif) ligand 8, CCL7 - chemokine (c-c motif) ligand 7, CCL2 - chemokine (c-c motif) ligand 2, CCL3L1 - chemokine (c-c motif…
GO:0001763	morphogenesis of a branching structure	0.000186	0.0179	1.6	14437	126	3508	49	[DCHS1 - dachsous 1 (drosophila), GDNF - glial cell derived neurotrophic factor, ESRP2 - epithelial splicing regulatory protein 2, NOTCH4 - notch 4, PBX1 - pre-b-cell leukemia homeobox 1, PML - promyelocytic leukemia, RERE - arginine-glutamic acid dipeptide (re) repeats, VEGFA - vascular endothelial growth factor a, GPC3 - glypican 3, PLXND1 - plexin d1, NRARP - notch-regulated ankyrin repeat pro…
GO:0002690	positive regulation of leukocyte chemotaxis	0.000191	0.0182	1.84	14437	67	3508	30	[LGALS9 - lectin, galactoside-binding, soluble, 9, TRPV4 - transient receptor potential cation channel, subfamily v, member 4, CCR7 - chemokine (c-c motif) receptor 7, CMKLR1 - chemokine-like receptor 1, CXCL9 - chemokine (c-x-c motif) ligand 9, HMGB1 - high mobility group box 1, CXCL12 - chemokine (c-x-c motif) ligand 12, CCR1 - chemokine (c-c motif) receptor 1, IL12A - interleukin 12a (natural …
GO:0050715	positive regulation of cytokine secretion	0.000191	0.0181	1.79	14437	76	3508	33	[LGALS9 - lectin, galactoside-binding, soluble, 9, TRPV4 - transient receptor potential cation channel, subfamily v, member 4, FFAR2 - free fatty acid receptor 2, CD244 - cd244 molecule, natural killer cell receptor 2b4, HMGB1 - high mobility group box 1, MIF - macrophage migration inhibitory factor (glycosylation-inhibiting factor), CD274 - cd274 molecule, CD14 - cd14 molecule, NLRP2 - nlr famil…
GO:0050906	detection of stimulus involved in sensory perception	0.000192	0.0181	1.82	14437	70	3508	31	[TAS2R20 - taste receptor, type 2, member 20, PPEF1 - protein phosphatase, ef-hand calcium binding domain 1, OR1F1 - olfactory receptor, family 1, subfamily f, member 1, KIAA1045 - kiaa1045, ATP2B2 - atpase, ca++ transporting, plasma membrane 2, TAS2R10 - taste receptor, type 2, member 10, OR2C1 - olfactory receptor, family 2, subfamily c, member 1, OR9A4 - olfactory receptor, family 9, subfamily…
GO:0045909	positive regulation of vasodilation	0.000202	0.0189	2.51	14437	23	3508	14	[UCN - urocortin, CPS1 - carbamoyl-phosphate synthase 1, mitochondrial, PTAFR - platelet-activating factor receptor, NOS2 - nitric oxide synthase 2, inducible, ALOX12 - arachidonate 12-lipoxygenase, NPPC - natriuretic peptide c, EGFR - epidermal growth factor receptor, GJA1 - gap junction protein, alpha 1, 43kda, AGT - angiotensinogen (serpin peptidase inhibitor, clade a, member 8), APLN - apelin…
GO:0071345	cellular response to cytokine stimulus	0.000203	0.0189	1.46	14437	206	3508	73	[LGALS9 - lectin, galactoside-binding, soluble, 9, IFIT2 - interferon-induced protein with tetratricopeptide repeats 2, IFIT1 - interferon-induced protein with tetratricopeptide repeats 1, IFIT3 - interferon-induced protein with tetratricopeptide repeats 3, CCL3L3 - chemokine (c-c motif) ligand 3-like 3, NOS2 - nitric oxide synthase 2, inducible, BRCA1 - breast cancer 1, early onset, ADAMTS13 - a…
GO:1900264	positive regulation of DNA-directed DNA polymerase activity	0.000205	0.0189	4.12	14437	6	3508	6	[RFC4 - replication factor c (activator 1) 4, 37kda, RFC5 - replication factor c (activator 1) 5, 36.5kda, RFC2 - replication factor c (activator 1) 2, 40kda, RFC3 - replication factor c (activator 1) 3, 38kda, CHTF18 - ctf18, chromosome transmission fidelity factor 18 homolog (s. cerevisiae), DSCC1 - dna replication and sister chromatid cohesion 1]
GO:1900262	regulation of DNA-directed DNA polymerase activity	0.000205	0.0188	4.12	14437	6	3508	6	[RFC4 - replication factor c (activator 1) 4, 37kda, RFC5 - replication factor c (activator 1) 5, 36.5kda, RFC2 - replication factor c (activator 1) 2, 40kda, RFC3 - replication factor c (activator 1) 3, 38kda, DSCC1 - dna replication and sister chromatid cohesion 1, CHTF18 - ctf18, chromosome transmission fidelity factor 18 homolog (s. cerevisiae)]
GO:0019220	regulation of phosphate metabolic process	0.000205	0.0187	1.17	14437	1322	3508	375	[LAX1 - lymphocyte transmembrane adaptor 1, LGALS9 - lectin, galactoside-binding, soluble, 9, EMP2 - epithelial membrane protein 2, FAM83D - family with sequence similarity 83, member d, GFRA2 - gdnf family receptor alpha 2, SEMA4C - sema domain, immunoglobulin domain (ig), transmembrane domain (tm) and short cytoplasmic domain, (semaphorin) 4c, SPTBN4 - spectrin, beta, non-erythrocytic 4, CARD14…
GO:2000026	regulation of multicellular organismal development	0.000206	0.0186	1.16	14437	1395	3508	394	[GFAP - glial fibrillary acidic protein, LGALS9 - lectin, galactoside-binding, soluble, 9, BMP2K - bmp2 inducible kinase, KIF20B - kinesin family member 20b, TNFRSF12A - tumor necrosis factor receptor superfamily, member 12a, SPOCK1 - sparc/osteonectin, cwcv and kazal-like domains proteoglycan (testican) 1, GDNF - glial cell derived neurotrophic factor, PLXNB3 - plexin b3, CARD11 - caspase recrui…
GO:0050707	regulation of cytokine secretion	0.000215	0.0194	1.62	14437	117	3508	46	[LGALS9 - lectin, galactoside-binding, soluble, 9, TRPV4 - transient receptor potential cation channel, subfamily v, member 4, FFAR2 - free fatty acid receptor 2, CCR7 - chemokine (c-c motif) receptor 7, FN1 - fibronectin 1, CD244 - cd244 molecule, natural killer cell receptor 2b4, IL1R2 - interleukin 1 receptor, type ii, MIF - macrophage migration inhibitory factor (glycosylation-inhibiting fact…
GO:0010033	response to organic substance	0.000225	0.0201	1.16	14437	1458	3508	410	[LGALS9 - lectin, galactoside-binding, soluble, 9, NPAS4 - neuronal pas domain protein 4, AANAT - aralkylamine n-acetyltransferase, CATSPER2 - cation channel, sperm associated 2, GATSL3 - gats protein-like 3, ABCA2 - atp-binding cassette, sub-family a (abc1), member 2, GCNT1 - glucosaminyl (n-acetyl) transferase 1, core 2, PML - promyelocytic leukemia, SPARC - secreted protein, acidic, cysteine-r…
GO:0072503	cellular divalent inorganic cation homeostasis	0.000226	0.0201	1.39	14437	272	3508	92	[OPRL1 - opiate receptor-like 1, ATP2A1 - atpase, ca++ transporting, cardiac muscle, fast twitch 1, TRPV4 - transient receptor potential cation channel, subfamily v, member 4, SYPL2 - synaptophysin-like 2, BNIP3 - bcl2/adenovirus e1b 19kda interacting protein 3, CHRNA7 - cholinergic receptor, nicotinic, alpha 7 (neuronal), ATP2B2 - atpase, ca++ transporting, plasma membrane 2, GPR55 - g protein-c…
GO:0055080	cation homeostasis	0.000234	0.0206	1.3	14437	450	3508	142	[OPRL1 - opiate receptor-like 1, BNIP3 - bcl2/adenovirus e1b 19kda interacting protein 3, SYPL2 - synaptophysin-like 2, TMTC2 - transmembrane and tetratricopeptide repeat containing 2, TRIM24 - tripartite motif containing 24, GPR55 - g protein-coupled receptor 55, DDIT3 - dna-damage-inducible transcript 3, CXCL12 - chemokine (c-x-c motif) ligand 12, CP - ceruloplasmin (ferroxidase), ANXA6 - annex…
GO:0070665	positive regulation of leukocyte proliferation	0.000236	0.0207	1.63	14437	111	3508	44	[LGALS9 - lectin, galactoside-binding, soluble, 9, LILRB2 - leukocyte immunoglobulin-like receptor, subfamily b (with tm and itim domains), member 2, SPTA1 - spectrin, alpha, erythrocytic 1 (elliptocytosis 2), SASH3 - sam and sh3 domain containing 3, CD1D - cd1d molecule, CD244 - cd244 molecule, natural killer cell receptor 2b4, CHRNB2 - cholinergic receptor, nicotinic, beta 2 (neuronal), SHH - s…
GO:0090280	positive regulation of calcium ion import	0.000244	0.0213	2.11	14437	39	3508	20	[GSTM2 - glutathione s-transferase mu 2 (muscle), BDKRB1 - bradykinin receptor b1, UCN - urocortin, KIAA1199 - kiaa1199, CXCL9 - chemokine (c-x-c motif) ligand 9, CXCL10 - chemokine (c-x-c motif) ligand 10, CCL2 - chemokine (c-c motif) ligand 2, CXCL12 - chemokine (c-x-c motif) ligand 12, HAP1 - huntingtin-associated protein 1, F2RL3 - coagulation factor ii (thrombin) receptor-like 3, CCL3 - chem…
GO:0071310	cellular response to organic substance	0.000247	0.0214	1.21	14437	876	3508	257	[RGS19 - regulator of g-protein signaling 19, LGALS9 - lectin, galactoside-binding, soluble, 9, LILRB2 - leukocyte immunoglobulin-like receptor, subfamily b (with tm and itim domains), member 2, NPAS4 - neuronal pas domain protein 4, AANAT - aralkylamine n-acetyltransferase, BRCA1 - breast cancer 1, early onset, GATSL3 - gats protein-like 3, PML - promyelocytic leukemia, HRH1 - histamine receptor…
GO:0006873	cellular ion homeostasis	0.000252	0.0217	1.31	14437	411	3508	131	[OPRL1 - opiate receptor-like 1, BNIP3 - bcl2/adenovirus e1b 19kda interacting protein 3, SYPL2 - synaptophysin-like 2, GPR55 - g protein-coupled receptor 55, DDIT3 - dna-damage-inducible transcript 3, CXCL12 - chemokine (c-x-c motif) ligand 12, SLC34A3 - solute carrier family 34 (type ii sodium/phosphate contransporter), member 3, CP - ceruloplasmin (ferroxidase), ANXA6 - annexin a6, SLC9C2 - so…
GO:0097530	granulocyte migration	0.000259	0.0221	1.86	14437	62	3508	28	[ITGA9 - integrin, alpha 9, CCL3L3 - chemokine (c-c motif) ligand 3-like 3, SCG2 - secretogranin ii, ITGA1 - integrin, alpha 1, HRH1 - histamine receptor h1, AMICA1 - adhesion molecule, interacts with cxadr antigen 1, PPBP - pro-platelet basic protein (chemokine (c-x-c motif) ligand 7), CCL4L2 - chemokine (c-c motif) ligand 4-like 2, S100A12 - s100 calcium binding protein a12, CCL13 - chemokine (…
GO:0030825	positive regulation of cGMP metabolic process	0.000264	0.0224	2.94	14437	14	3508	10	[APOE - apolipoprotein e, OSTN - osteocrin, NOS2 - nitric oxide synthase 2, inducible, GUCY1A3 - guanylate cyclase 1, soluble, alpha 3, NOS3 - nitric oxide synthase 3 (endothelial cell), RUNDC3A - run domain containing 3a, NPR1 - natriuretic peptide receptor a/guanylate cyclase a (atrionatriuretic peptide receptor a), NPPC - natriuretic peptide c, WNT5A - wingless-type mmtv integration site famil…
GO:0007076	mitotic chromosome condensation	0.000264	0.0223	2.94	14437	14	3508	10	[CDCA5 - cell division cycle associated 5, NCAPG - non-smc condensin i complex, subunit g, NCAPH - non-smc condensin i complex, subunit h, SMC2 - structural maintenance of chromosomes 2, NCAPD3 - non-smc condensin ii complex, subunit d3, PHF13 - phd finger protein 13, NCAPD2 - non-smc condensin i complex, subunit d2, SMC4 - structural maintenance of chromosomes 4, NUSAP1 - nucleolar and spindle a…
GO:0048754	branching morphogenesis of an epithelial tube	0.000267	0.0225	1.65	14437	102	3508	41	[PITX2 - paired-like homeodomain 2, HOXA11 - homeobox a11, DCHS1 - dachsous 1 (drosophila), SHH - sonic hedgehog, FGF10 - fibroblast growth factor 10, SLIT2 - slit homolog 2 (drosophila), PTCH1 - patched 1, GDNF - glial cell derived neurotrophic factor, FGF8 - fibroblast growth factor 8 (androgen-induced), ESRP2 - epithelial splicing regulatory protein 2, NOTCH4 - notch 4, DLL4 - delta-like 4 (dr…
GO:0007611	learning or memory	0.000277	0.0231	1.51	14437	164	3508	60	[AFF2 - af4/fmr2 family, member 2, NPAS4 - neuronal pas domain protein 4, CHRNA7 - cholinergic receptor, nicotinic, alpha 7 (neuronal), GPR52 - g protein-coupled receptor 52, CHRNB2 - cholinergic receptor, nicotinic, beta 2 (neuronal), SLC6A4 - solute carrier family 6 (neurotransmitter transporter), member 4, SLC8A2 - solute carrier family 8 (sodium/calcium exchanger), member 2, SYT4 - synaptotag…
GO:0007155	cell adhesion	0.000278	0.0231	1.19	14437	1025	3508	296	[CD93 - cd93 molecule, EMP2 - epithelial membrane protein 2, LILRB2 - leukocyte immunoglobulin-like receptor, subfamily b (with tm and itim domains), member 2, CLDN23 - claudin 23, LGALS4 - lectin, galactoside-binding, soluble, 4, SVEP1 - sushi, von willebrand factor type a, egf and pentraxin domain containing 1, TNFRSF12A - tumor necrosis factor receptor superfamily, member 12a, PLXNC1 - plexin …
GO:0019935	cyclic-nucleotide-mediated signaling	0.000297	0.0245	2.18	14437	34	3508	18	[KSR1 - kinase suppressor of ras 1, PDE9A - phosphodiesterase 9a, ADCYAP1R1 - adenylate cyclase activating polypeptide 1 (pituitary) receptor type i, RAPGEF3 - rap guanine nucleotide exchange factor (gef) 3, SLC9A3R1 - solute carrier family 9, subfamily a (nhe3, cation proton antiporter 3), member 3 regulator 1, EIF4EBP2 - eukaryotic translation initiation factor 4e binding protein 2, ADCY9 - ade…
GO:0007019	microtubule depolymerization	0.000314	0.0258	3.6	14437	8	3508	7	[CCSAP - centriole, cilia and spindle-associated protein, KIF24 - kinesin family member 24, STMN1 - stathmin 1, KIF18B - kinesin family member 18b, KIF18A - kinesin family member 18a, KIF2C - kinesin family member 2c, NCKAP5L - nck-associated protein 5-like]
GO:0022610	biological adhesion	0.000321	0.0262	1.19	14437	1027	3508	296	[CD93 - cd93 molecule, EMP2 - epithelial membrane protein 2, LILRB2 - leukocyte immunoglobulin-like receptor, subfamily b (with tm and itim domains), member 2, CLDN23 - claudin 23, LGALS4 - lectin, galactoside-binding, soluble, 4, SVEP1 - sushi, von willebrand factor type a, egf and pentraxin domain containing 1, TNFRSF12A - tumor necrosis factor receptor superfamily, member 12a, PLXNC1 - plexin …
GO:0006268	DNA unwinding involved in DNA replication	0.000335	0.0272	3.29	14437	10	3508	8	[MCM4 - minichromosome maintenance complex component 4, RAD51 - rad51 recombinase, MCM6 - minichromosome maintenance complex component 6, TOP2B - topoisomerase (dna) ii beta 180kda, C10orf2 - chromosome 10 open reading frame 2, TOP2A - topoisomerase (dna) ii alpha 170kda, HMGA1 - high mobility group at-hook 1, MCM2 - minichromosome maintenance complex component 2]
GO:0042487	regulation of odontogenesis of dentin-containing tooth	0.000335	0.027	3.29	14437	10	3508	8	[CSF1 - colony stimulating factor 1 (macrophage), DMP1 - dentin matrix acidic phosphoprotein 1, BMP2 - bone morphogenetic protein 2, DMRT3 - doublesex and mab-3 related transcription factor 3, RSPO2 - r-spondin 2, BMP4 - bone morphogenetic protein 4, FGF8 - fibroblast growth factor 8 (androgen-induced), TNFRSF11B - tumor necrosis factor receptor superfamily, member 11b]
GO:0061138	morphogenesis of a branching epithelium	0.000339	0.0272	1.59	14437	119	3508	46	[PITX2 - paired-like homeodomain 2, HOXA11 - homeobox a11, DCHS1 - dachsous 1 (drosophila), FZD5 - frizzled family receptor 5, SHH - sonic hedgehog, FGF10 - fibroblast growth factor 10, SLIT2 - slit homolog 2 (drosophila), PTCH1 - patched 1, GDNF - glial cell derived neurotrophic factor, FGF8 - fibroblast growth factor 8 (androgen-induced), FGF7 - fibroblast growth factor 7, NOTCH4 - notch 4, ESR…
GO:0071675	regulation of mononuclear cell migration	0.000347	0.0277	2.27	14437	29	3508	16	[TRPV4 - transient receptor potential cation channel, subfamily v, member 4, CSF1 - colony stimulating factor 1 (macrophage), SLAMF1 - signaling lymphocytic activation molecule family member 1, CMKLR1 - chemokine-like receptor 1, CCL5 - chemokine (c-c motif) ligand 5, TNFSF18 - tumor necrosis factor (ligand) superfamily, member 18, CXCL10 - chemokine (c-x-c motif) ligand 10, SLIT2 - slit homolog …
GO:0055082	cellular chemical homeostasis	0.000353	0.028	1.28	14437	472	3508	147	[OPRL1 - opiate receptor-like 1, BNIP3 - bcl2/adenovirus e1b 19kda interacting protein 3, SYPL2 - synaptophysin-like 2, GPR55 - g protein-coupled receptor 55, DDIT3 - dna-damage-inducible transcript 3, MIP - major intrinsic protein of lens fiber, CXCL12 - chemokine (c-x-c motif) ligand 12, SLC34A3 - solute carrier family 34 (type ii sodium/phosphate contransporter), member 3, CP - ceruloplasmin (…
GO:0007126	meiotic nuclear division	0.000355	0.028	1.85	14437	60	3508	27	[C17orf104 - chromosome 17 open reading frame 104, EREG - epiregulin, BRCA2 - breast cancer 2, early onset, RAD54L - rad54-like (s. cerevisiae), TUBGCP5 - tubulin, gamma complex associated protein 5, KIF18A - kinesin family member 18a, PLD6 - phospholipase d family, member 6, CDC25B - cell division cycle 25b, CCNA1 - cyclin a1, SMC1B - structural maintenance of chromosomes 1b, MKI67 - antigen ide…
GO:0030801	positive regulation of cyclic nucleotide metabolic process	0.000359	0.0282	1.81	14437	66	3508	29	[NOS2 - nitric oxide synthase 2, inducible, MRAP2 - melanocortin 2 receptor accessory protein 2, CXCL9 - chemokine (c-x-c motif) ligand 9, AKAP12 - a kinase (prka) anchor protein 12, ADCY6 - adenylate cyclase 6, NOS3 - nitric oxide synthase 3 (endothelial cell), ADCY5 - adenylate cyclase 5, RUNDC3A - run domain containing 3a, PTHLH - parathyroid hormone-like hormone, ADCY8 - adenylate cyclase 8 (…
GO:0048870	cell motility	0.000376	0.0294	1.23	14437	679	3508	203	[MDGA1 - mam domain containing glycosylphosphatidylinositol anchor 1, EMP2 - epithelial membrane protein 2, FAM83D - family with sequence similarity 83, member d, SEMA4C - sema domain, immunoglobulin domain (ig), transmembrane domain (tm) and short cytoplasmic domain, (semaphorin) 4c, SPOCK1 - sparc/osteonectin, cwcv and kazal-like domains proteoglycan (testican) 1, CATSPER2 - cation channel, spe…
GO:0002250	adaptive immune response	0.000377	0.0292	1.52	14437	149	3508	55	[LAX1 - lymphocyte transmembrane adaptor 1, EMP2 - epithelial membrane protein 2, LILRB2 - leukocyte immunoglobulin-like receptor, subfamily b (with tm and itim domains), member 2, CD244 - cd244 molecule, natural killer cell receptor 2b4, UNC93B1 - unc-93 homolog b1 (c. elegans), IL12B - interleukin 12b (natural killer cell stimulatory factor 2, cytotoxic lymphocyte maturation factor 2, p40), SH2…
GO:0061351	neural precursor cell proliferation	0.000377	0.0291	2.06	14437	40	3508	20	[SLC39A5 - solute carrier family 39 (zinc transporter), member 5, KIF14 - kinesin family member 14, RORA - rar-related orphan receptor a, DAGLA - diacylglycerol lipase, alpha, SHH - sonic hedgehog, EPHB1 - eph receptor b1, HHIP - hedgehog interacting protein, EML1 - echinoderm microtubule associated protein like 1, MELK - maternal embryonic leucine zipper kinase, FGF8 - fibroblast growth factor 8…
GO:0050679	positive regulation of epithelial cell proliferation	0.000378	0.029	1.57	14437	126	3508	48	[TEK - tek tyrosine kinase, endothelial, SCG2 - secretogranin ii, PPP1R16B - protein phosphatase 1, regulatory subunit 16b, JUN - jun proto-oncogene, SHH - sonic hedgehog, FGF10 - fibroblast growth factor 10, CDH3 - cadherin 3, type 1, p-cadherin (placental), FLT4 - fms-related tyrosine kinase 4, HMGB2 - high mobility group box 2, NME2 - nme/nm23 nucleoside diphosphate kinase 2, CXCL12 - chemokin…
GO:0050890	cognition	0.000384	0.0293	1.46	14437	186	3508	66	[AFF2 - af4/fmr2 family, member 2, GPR155 - g protein-coupled receptor 155, NPAS4 - neuronal pas domain protein 4, CHRNA7 - cholinergic receptor, nicotinic, alpha 7 (neuronal), GPR52 - g protein-coupled receptor 52, CHRNB2 - cholinergic receptor, nicotinic, beta 2 (neuronal), SLC6A4 - solute carrier family 6 (neurotransmitter transporter), member 4, SLC8A2 - solute carrier family 8 (sodium/calciu…
GO:0001817	regulation of cytokine production	0.000394	0.0299	1.28	14437	484	3508	150	[LGALS9 - lectin, galactoside-binding, soluble, 9, LILRB2 - leukocyte immunoglobulin-like receptor, subfamily b (with tm and itim domains), member 2, SASH3 - sam and sh3 domain containing 3, DHX58 - dexh (asp-glu-x-his) box polypeptide 58, FN1 - fibronectin 1, CD244 - cd244 molecule, natural killer cell receptor 2b4, BIRC3 - baculoviral iap repeat containing 3, F11R - f11 receptor, DDX60 - dead (…
GO:0099536	synaptic signaling	0.0004	0.0302	1.42	14437	217	3508	75	[SYN1 - synapsin i, OPRL1 - opiate receptor-like 1, SLC6A12 - solute carrier family 6 (neurotransmitter transporter), member 12, SLC6A9 - solute carrier family 6 (neurotransmitter transporter, glycine), member 9, CHRNA7 - cholinergic receptor, nicotinic, alpha 7 (neuronal), GPR52 - g protein-coupled receptor 52, CHRNB2 - cholinergic receptor, nicotinic, beta 2 (neuronal), SLC6A4 - solute carrier …
GO:0099537	trans-synaptic signaling	0.0004	0.0301	1.42	14437	217	3508	75	[SYN1 - synapsin i, OPRL1 - opiate receptor-like 1, SLC6A12 - solute carrier family 6 (neurotransmitter transporter), member 12, SLC6A9 - solute carrier family 6 (neurotransmitter transporter, glycine), member 9, CHRNA7 - cholinergic receptor, nicotinic, alpha 7 (neuronal), GPR52 - g protein-coupled receptor 52, CHRNB2 - cholinergic receptor, nicotinic, beta 2 (neuronal), SLC6A4 - solute carrier …
GO:0031055	chromatin remodeling at centromere	0.000409	0.0306	2.01	14437	43	3508	21	[CENPA - centromere protein a, HIST1H4I - histone cluster 1, h4i, ITGB3BP - integrin beta 3 binding protein (beta3-endonexin), CENPM - centromere protein m, OIP5 - opa interacting protein 5, HIST1H4F - histone cluster 1, h4f, CENPK - centromere protein k, CASC5 - cancer susceptibility candidate 5, HELLS - helicase, lymphoid-specific, HIST1H4L - histone cluster 1, h4l, CENPQ - centromere protein q…
GO:0002548	monocyte chemotaxis	0.000414	0.0308	2.19	14437	32	3508	17	[S100A12 - s100 calcium binding protein a12, CCL3L3 - chemokine (c-c motif) ligand 3-like 3, CCL13 - chemokine (c-c motif) ligand 13, CCL15 - chemokine (c-c motif) ligand 15, CCL5 - chemokine (c-c motif) ligand 5, CCL4 - chemokine (c-c motif) ligand 4, CCL8 - chemokine (c-c motif) ligand 8, CCL7 - chemokine (c-c motif) ligand 7, CCL2 - chemokine (c-c motif) ligand 2, CCL3L1 - chemokine (c-c motif…
GO:0001501	skeletal system development	0.000421	0.0312	1.58	14437	120	3508	46	[HOXA13 - homeobox a13, ADAMTS4 - adam metallopeptidase with thrombospondin type 1 motif, 4, HOXA11 - homeobox a11, PAPSS2 - 3'-phosphoadenosine 5'-phosphosulfate synthase 2, CMKLR1 - chemokine-like receptor 1, FGFR3 - fibroblast growth factor receptor 3, SHH - sonic hedgehog, ACVR2A - activin a receptor, type iia, SHOX2 - short stature homeobox 2, PBX1 - pre-b-cell leukemia homeobox 1, COL3A1 - …
GO:0050793	regulation of developmental process	0.000428	0.0315	1.13	14437	1838	3508	505	[LGALS9 - lectin, galactoside-binding, soluble, 9, GFAP - glial fibrillary acidic protein, BMP2K - bmp2 inducible kinase, SPTA1 - spectrin, alpha, erythrocytic 1 (elliptocytosis 2), KIF20B - kinesin family member 20b, TNFRSF12A - tumor necrosis factor receptor superfamily, member 12a, SPTBN4 - spectrin, beta, non-erythrocytic 4, SPOCK1 - sparc/osteonectin, cwcv and kazal-like domains proteoglycan…
GO:0014066	regulation of phosphatidylinositol 3-kinase signaling	0.000444	0.0325	1.58	14437	117	3508	45	[TEK - tek tyrosine kinase, endothelial, PIK3IP1 - phosphoinositide-3-kinase interacting protein 1, KL - klotho, PPP1R16B - protein phosphatase 1, regulatory subunit 16b, SLC9A3R1 - solute carrier family 9, subfamily a (nhe3, cation proton antiporter 3), member 3 regulator 1, FGFR3 - fibroblast growth factor receptor 3, EREG - epiregulin, FGF10 - fibroblast growth factor 10, KLB - klotho beta, IR…
GO:0051094	positive regulation of developmental process	0.000454	0.033	1.19	14437	937	3508	271	[GFAP - glial fibrillary acidic protein, LGALS9 - lectin, galactoside-binding, soluble, 9, LILRB2 - leukocyte immunoglobulin-like receptor, subfamily b (with tm and itim domains), member 2, BNIP3 - bcl2/adenovirus e1b 19kda interacting protein 3, KIF20B - kinesin family member 20b, TNFRSF12A - tumor necrosis factor receptor superfamily, member 12a, BRCA1 - breast cancer 1, early onset, SPTBN4 - s…
GO:0030334	regulation of cell migration	0.000455	0.0329	1.25	14437	581	3508	176	[IFITM1 - interferon induced transmembrane protein 1, LGALS9 - lectin, galactoside-binding, soluble, 9, GPR124 - g protein-coupled receptor 124, EMP2 - epithelial membrane protein 2, MAGI2 - membrane associated guanylate kinase, ww and pdz domain containing 2, PHLDB2 - pleckstrin homology-like domain, family b, member 2, FN1 - fibronectin 1, KIF20B - kinesin family member 20b, SEMA4C - sema domai…
GO:0030003	cellular cation homeostasis	0.000463	0.0334	1.3	14437	402	3508	127	[OPRL1 - opiate receptor-like 1, BNIP3 - bcl2/adenovirus e1b 19kda interacting protein 3, SYPL2 - synaptophysin-like 2, GPR55 - g protein-coupled receptor 55, DDIT3 - dna-damage-inducible transcript 3, CXCL12 - chemokine (c-x-c motif) ligand 12, CP - ceruloplasmin (ferroxidase), ANXA6 - annexin a6, SLC9C2 - solute carrier family 9, member c2 (putative), PML - promyelocytic leukemia, SLC46A1 - sol…
GO:0035115	embryonic forelimb morphogenesis	0.000481	0.0345	2.29	14437	27	3508	15	[HOXA11 - homeobox a11, SHH - sonic hedgehog, ZNF358 - zinc finger protein 358, TFAP2A - transcription factor ap-2 alpha (activating enhancer binding protein 2 alpha), SHOX2 - short stature homeobox 2, RDH10 - retinol dehydrogenase 10 (all-trans), TBX3 - t-box 3, WNT9A - wingless-type mmtv integration site family, member 9a, ALX4 - alx homeobox 4, MSX1 - msh homeobox 1, ALDH1A2 - aldehyde dehydro…
GO:0009581	detection of external stimulus	0.000482	0.0344	1.76	14437	70	3508	30	[GNGT1 - guanine nucleotide binding protein (g protein), gamma transducing activity polypeptide 1, CNGA1 - cyclic nucleotide gated channel alpha 1, RRH - retinal pigment epithelium-derived rhodopsin homolog, KIAA1045 - kiaa1045, ATP2B2 - atpase, ca++ transporting, plasma membrane 2, PDE6B - phosphodiesterase 6b, cgmp-specific, rod, beta, NTRK1 - neurotrophic tyrosine kinase, receptor, type 1, ITG…
GO:0044843	cell cycle G1/S phase transition	0.000494	0.035	1.65	14437	95	3508	38	[CDC6 - cell division cycle 6, CDC25A - cell division cycle 25a, CDK1 - cyclin-dependent kinase 1, CCNE2 - cyclin e2, ORC1 - origin recognition complex, subunit 1, CCNE1 - cyclin e1, CDT1 - chromatin licensing and dna replication factor 1, CAMK2D - calcium/calmodulin-dependent protein kinase ii delta, PRIM1 - primase, dna, polypeptide 1 (49kda), CCNA1 - cyclin a1, INHBA - inhibin, beta a, MCM10 -…
GO:0000082	G1/S transition of mitotic cell cycle	0.000494	0.0349	1.65	14437	95	3508	38	[CDC6 - cell division cycle 6, CDC25A - cell division cycle 25a, CDK1 - cyclin-dependent kinase 1, CCNE2 - cyclin e2, ORC1 - origin recognition complex, subunit 1, CCNE1 - cyclin e1, CDT1 - chromatin licensing and dna replication factor 1, CAMK2D - calcium/calmodulin-dependent protein kinase ii delta, PRIM1 - primase, dna, polypeptide 1 (49kda), CCNA1 - cyclin a1, INHBA - inhibin, beta a, MCM10 -…
GO:0032946	positive regulation of mononuclear cell proliferation	0.000519	0.0365	1.6	14437	108	3508	42	[LGALS9 - lectin, galactoside-binding, soluble, 9, LILRB2 - leukocyte immunoglobulin-like receptor, subfamily b (with tm and itim domains), member 2, SPTA1 - spectrin, alpha, erythrocytic 1 (elliptocytosis 2), SASH3 - sam and sh3 domain containing 3, CD1D - cd1d molecule, CD244 - cd244 molecule, natural killer cell receptor 2b4, CHRNB2 - cholinergic receptor, nicotinic, beta 2 (neuronal), SHH - s…
GO:0031589	cell-substrate adhesion	0.000522	0.0365	1.56	14437	121	3508	46	[TEK - tek tyrosine kinase, endothelial, KIF14 - kinesin family member 14, ITGA4 - integrin, alpha 4 (antigen cd49d, alpha 4 subunit of vla-4 receptor), TMEM8B - transmembrane protein 8b, EMP2 - epithelial membrane protein 2, ITGA10 - integrin, alpha 10, FN1 - fibronectin 1, TECTA - tectorin alpha, TNFRSF12A - tumor necrosis factor receptor superfamily, member 12a, ANTXR1 - anthrax toxin receptor…
GO:0006874	cellular calcium ion homeostasis	0.000524	0.0364	1.38	14437	257	3508	86	[OPRL1 - opiate receptor-like 1, ATP2A1 - atpase, ca++ transporting, cardiac muscle, fast twitch 1, TRPV4 - transient receptor potential cation channel, subfamily v, member 4, SYPL2 - synaptophysin-like 2, BNIP3 - bcl2/adenovirus e1b 19kda interacting protein 3, CHRNA7 - cholinergic receptor, nicotinic, alpha 7 (neuronal), ATP2B2 - atpase, ca++ transporting, plasma membrane 2, GPR55 - g protein-c…
GO:1902105	regulation of leukocyte differentiation	0.000527	0.0365	1.43	14437	205	3508	71	[LGALS9 - lectin, galactoside-binding, soluble, 9, LILRB2 - leukocyte immunoglobulin-like receptor, subfamily b (with tm and itim domains), member 2, SASH3 - sam and sh3 domain containing 3, GPR55 - g protein-coupled receptor 55, ZEB1 - zinc finger e-box binding homeobox 1, HMGB1 - high mobility group box 1, IL12B - interleukin 12b (natural killer cell stimulatory factor 2, cytotoxic lymphocyte m…
GO:0044767	single-organism developmental process	0.000542	0.0373	1.09	14437	3286	3508	870	[GFAP - glial fibrillary acidic protein, CATSPER2 - cation channel, sperm associated 2, GDNF - glial cell derived neurotrophic factor, SEPT4 - septin 4, MADCAM1 - mucosal vascular addressin cell adhesion molecule 1, GCNT1 - glucosaminyl (n-acetyl) transferase 1, core 2, ESRP2 - epithelial splicing regulatory protein 2, GCNT2 - glucosaminyl (n-acetyl) transferase 2, i-branching enzyme (i blood gro…
RNP1 - tmf1-regulated nuclear protein 1, RPGRIP1 - retinitis pigmentosa gtpase regulator interacting protein 1, VEGFA - vascular endothelial growth factor a, VGF - vgf nerve growth factor inducible, PLXND1 - plexin d1, VEGFC - vascular endothelial growth factor c, EVPL - envoplakin, KDM6B - lysine (k)-specific demethylase 6b, CHRNA10 - cholinergic receptor, nicotinic, alpha 10 (neuronal), EPB41L3…
GO:0023051	regulation of signaling	0.00055	0.0377	1.11	14437	2543	3508	683	[LGALS9 - lectin, galactoside-binding, soluble, 9, GFAP - glial fibrillary acidic protein, ARAP2 - arfgap with rhogap domain, ankyrin repeat and ph domain 2, NPAS4 - neuronal pas domain protein 4, GFRA2 - gdnf family receptor alpha 2, TNFRSF12A - tumor necrosis factor receptor superfamily, member 12a, DDX60 - dead (asp-glu-ala-asp) box polypeptide 60, AKAP12 - a kinase (prka) anchor protein 12, G…
receptor, alpha, RHOF - ras homolog family member f (in filopodia), CISH - cytokine inducible sh2-containing protein]
[truncated: 72 more rows]

## Sheet: H37Rv 0 Hour
GO Term	Description	P-value	FDR q-value	Enrichment	N	B	n	b	Genes
[truncated: 51 more rows]

## Sheet: H37Rv 6 Hours
GO Term	Description	P-value	FDR q-value	Enrichment	N	B	n	b	Genes
[truncated: 85 more rows]

## Sheet: H37Rv 12 Hours
GO Term	Description	P-value	FDR q-value	Enrichment	N	B	n	b	Genes
[truncated: 104 more rows]

## Sheet: H37Rv 24 Hours
GO Term	Description	P-value	FDR q-value	Enrichment	N	B	n	b	Genes
[truncated: 120 more rows]

[truncated: 2 more sheets: H37Rv 36 Hours, H37Rv 48 Hours]
