# Supplementary material for: Alternate splicing of transcripts shape macrophage response to Mycobacterium tuberculosis infection
Source: PLoS Pathog. 2017 Mar 3;13(3):e1006236. doi: 10.1371/journal.ppat.1006236 (PMC5352146; doi:10.1371/journal.ppat.1006236)
Supplement: S10 Table — (XLSX) [file ppat.1006236.s017.xlsx]

## Sheet: AS Primers
S.No.	Gene/Transcript	5'-----Sequence----->3'	Length
1	FW_ACSL1	ATGGTCACTCACCGAAACATAG	22
2	RV_ACSL1	TAGCTCCATGACACAGCATTAC	22
3	FW_ATG13	CCATTACCGAAGCGGATGAA	20
4	RV_ATG13	GTGCTTCCCTCACTGGTTAAG	21
5	FW_IL1B	ATGACCTGAGCACCTTCTTTC	21
6	RV_IL1B	TGCACATAAGCCTCGTTATCC	21
7	FW_CORO1B	CTCAGCCTGGTGAGCTAATG	20
8	RV_CORO1B	GTGCCCACATTCCAGATGA	19
9	FW_PGK1	CTCAACAACATGGAGGTAGGAA	22
10	RV_PGK1	GGCTCCCTCTTCATCAAACA	20
11	FW_RAB8B	GATGGCGAAGACGTACGATTAT	22
12	RV_RAB8B	AGATGAAGGTGGTGTTGAAGG	21
13	FW_DNM1	TGTGCTGACTGCTGAGAATC	20
14	RV_DNM1	CTCGACATAAAGCCCTTCTCC	21
15	FW_BRI3	CTGCAGGCGAGGAGAAG	17
16	RV_BRI3	CACGATAGAGTTGGCAGGATAG	22
17	FW_COX7A2	GATTGGGCAGAGGACGATAAG	21
18	RV_COX7A2	CACTCCTGCTTCTTGGGAAA	20
19	FW_18S_rRNA	GCTTAATTTGACTCAACACGGGA	23
20	RV_18S_rRNA	AGCTATCAATCTGTCAATCCTGTC	24
21	FW_Actin	ACCTTCTACAATGAGCTGCG	21
22	RV_Actin	CCTGGATAGCAACGTACATGG	22
